# Supplementary material for: Nine new cytochalasan alkaloids from Chaetomium globosum TW1-1 (Ascomycota, Sordariales)
Source: PubMed Central journal article supplement (PMC4703973; doi:10.1038/srep18711), 2016-01-07

*Nine new cytochalasan alkaloids from Chaetomium globosum TW1-1 (Ascomycota, Sordariales)*

Chunmei Chen<sup>1</sup>, Qingyi Tong<sup>1</sup>, Hucheng Zhu<sup>1</sup>, Dongdong Tan<sup>1</sup>, Jinwen Zhang<sup>3</sup>, Yongbo Xue<sup>1</sup>, Guangmin Yao<sup>1</sup>, Zengwei Luo<sup>1</sup>, Jianping Wang<sup>1,\*</sup>, Yanyan Wang<sup>2,\*</sup> & Yonghui Zhang<sup>1,\*</sup>

<sup>1</sup> Hubei Key Laboratory of Natural Medicinal Chemistry and Resource Evaluation, School of Pharmacy, Tongji Medical College, Huazhong University of Science and Technology, Wuhan 430030, China

<sup>2</sup> First College of Clinical Medical Science, China Three Gorges University & Yichang Central People's Hospital, Yichang 443003, China

<sup>3</sup> Tongji Hospital Affiliated to Tongji Medical College, Huazhong University of Science and Technology, Wuhan 430030, China

# Content

|                                                         |    |
|---------------------------------------------------------|----|
| Cytotoxic activities of compounds <b>1–9</b> .....      | 1  |
| UV, IR, MS, and NMR spectrum of compound <b>1</b> ..... | 2  |
| UV, IR, MS, and NMR spectrum of compound <b>2</b> ..... | 5  |
| UV, IR, MS, and NMR spectrum of compound <b>3</b> ..... | 10 |
| UV, IR, MS, and NMR spectrum of compound <b>4</b> ..... | 14 |
| UV, IR, MS, and NMR spectrum of compound <b>5</b> ..... | 19 |
| UV, IR, MS, and NMR spectrum of compound <b>6</b> ..... | 23 |
| UV, IR, MS, and NMR spectrum of compound <b>7</b> ..... | 28 |
| UV, IR, MS, and NMR spectrum of compound <b>8</b> ..... | 32 |
| UV, IR, MS, and NMR spectrum of compound <b>9</b> ..... | 37 |

**Table S1. Cytotoxic activities of compounds 1–9 ( $\mu\text{M}$ )**

| Compound | HL-60 | SMMC-7721 | A-549 | MCF-7 | SW480 | BEAS-2B |
|----------|-------|-----------|-------|-------|-------|---------|
| <b>1</b> | >40   | >40       | >40   | >40   | >40   | >40     |
| <b>2</b> | >40   | >40       | >40   | >40   | >40   | >40     |
| <b>3</b> | >40   | >40       | >40   | >40   | >40   | >40     |
| <b>4</b> | >40   | >40       | >40   | >40   | >40   | >40     |
| <b>5</b> | >40   | >40       | >40   | >40   | >40   | >40     |
| <b>6</b> | >40   | >40       | >40   | >40   | >40   | >40     |
| <b>7</b> | >40   | >40       | >40   | >40   | >40   | >40     |
| <b>8</b> | 23.12 | 14.13     | 17.08 | >40   | 30.42 | 23.87   |
| <b>9</b> | 10.45 | >40       | 23.11 | >40   | >40   | 10.45   |
| DDP      | 1.93  | 10.21     | 6.59  | 8.20  | 12.16 | 9.07    |

# UV spectrum of compound 1

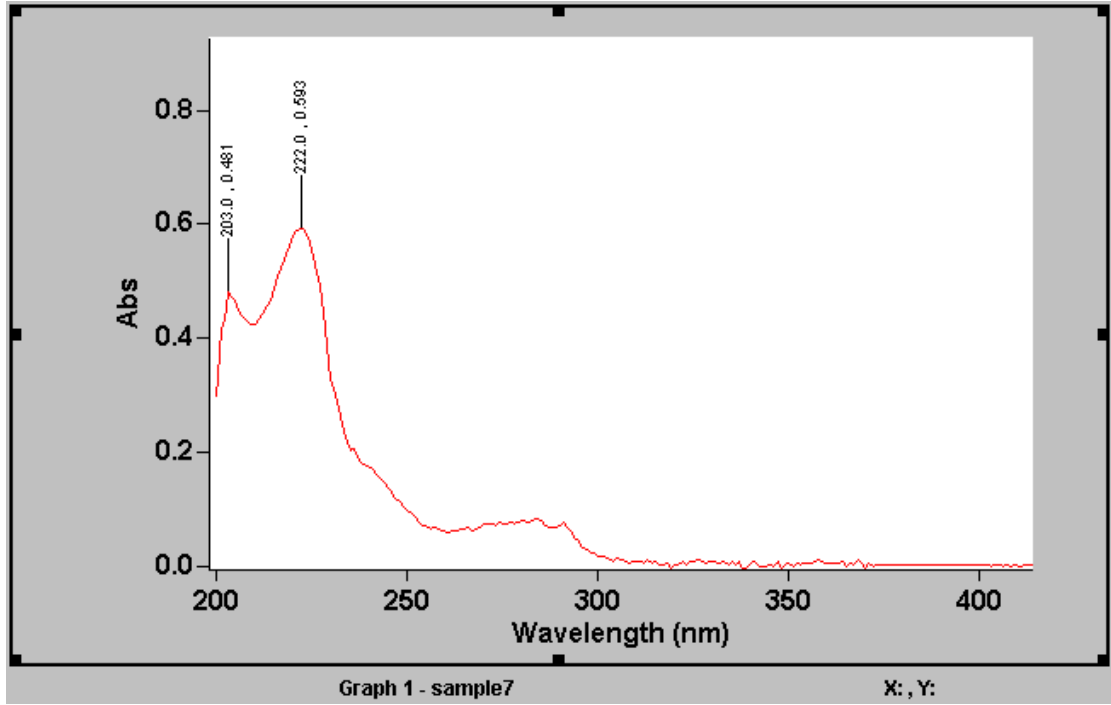

# IR spectrum of compound 1

E:\同济医学院\张勇慧\20140325\CG2-7-11.0

仪器型号: Bruker Vertex 70

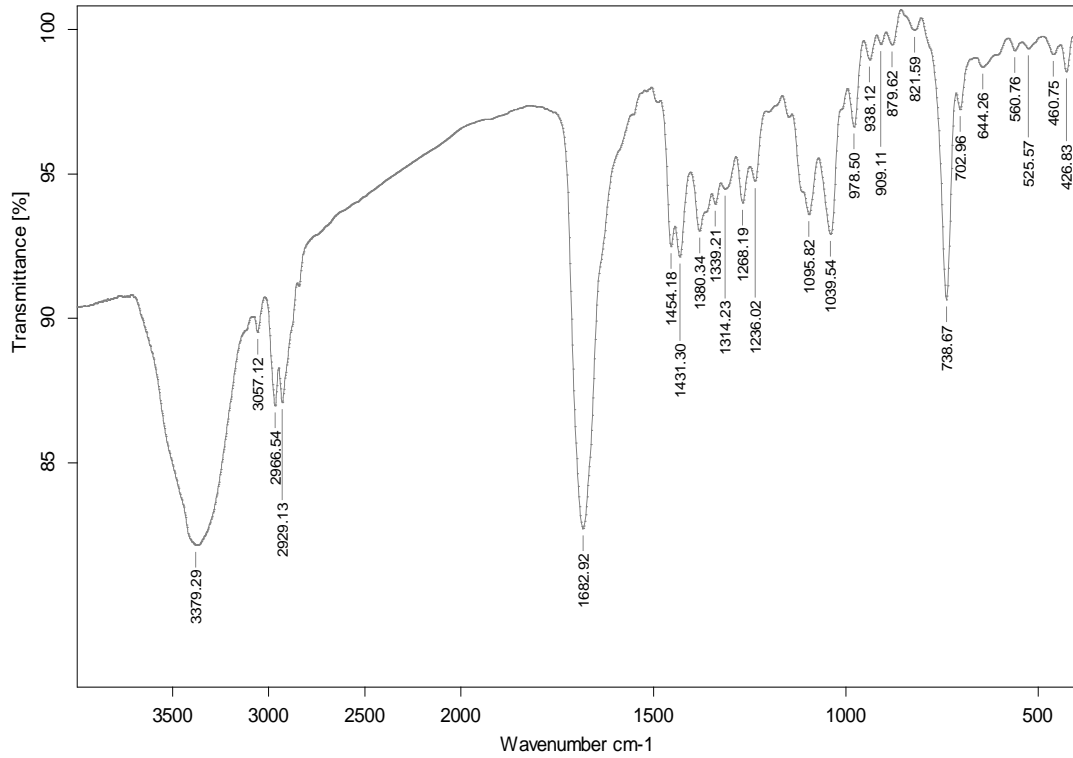

# HRESIMS spectrum of compound 1

CCM2-77-11 #43 RT: 0.61 AV: 1 NL: 6.62E5  
T: FTMS + p ESI Full ms [50.00-1500.00]

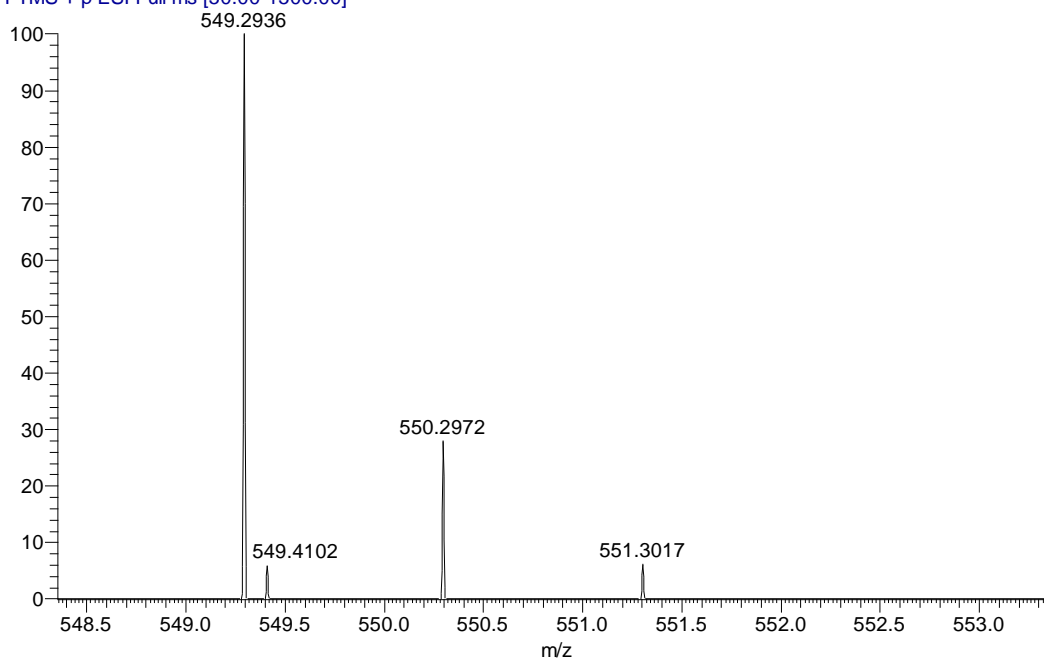

# <sup>1</sup>H NMR spectrum of compound 1

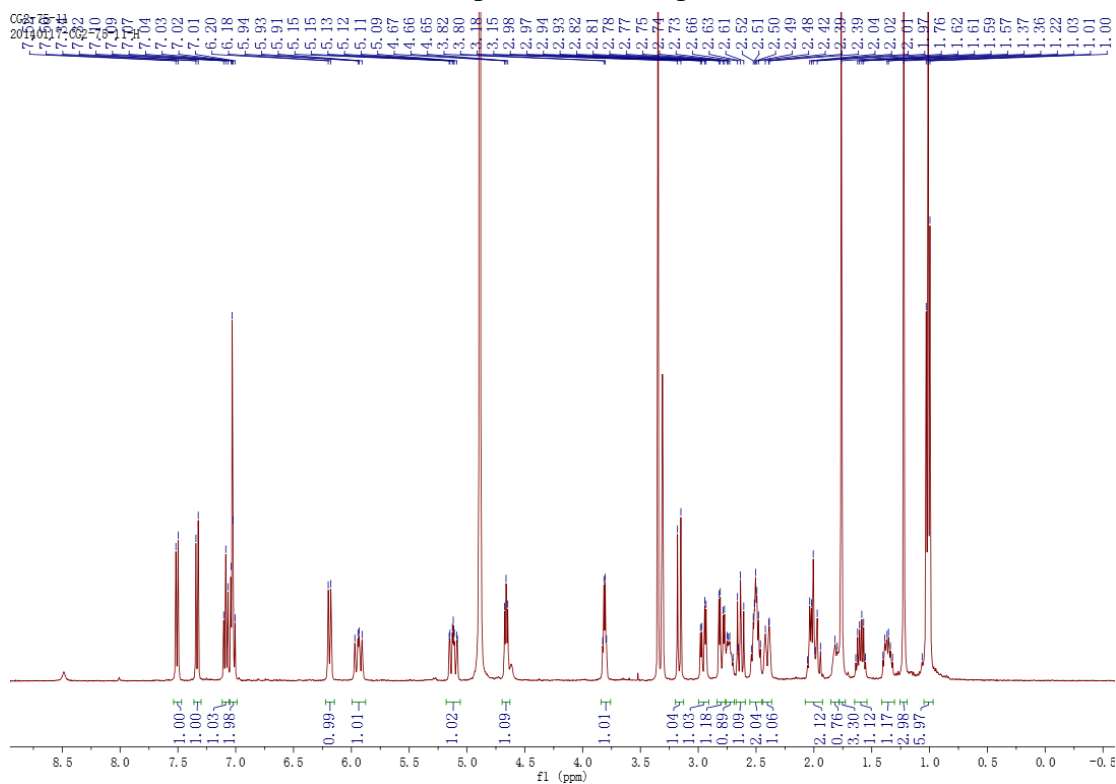

### <sup>13</sup>C NMR and DEPT spectra of compound 1

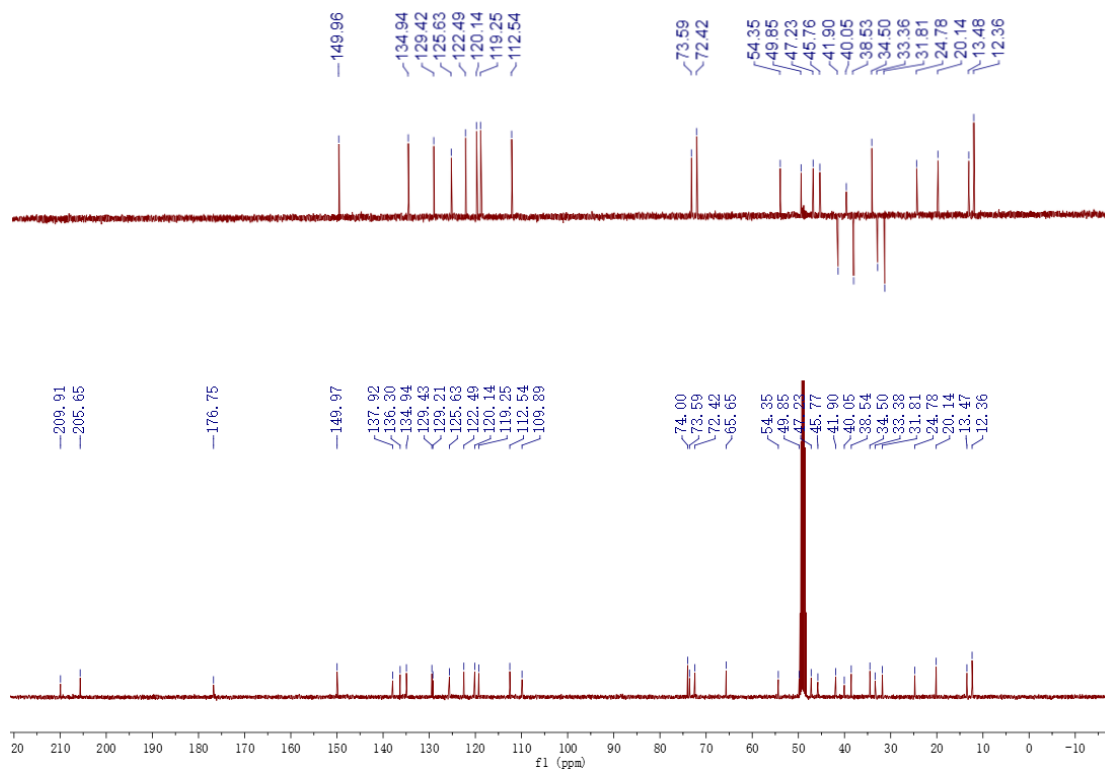

### HSQC spectrum of compound 1

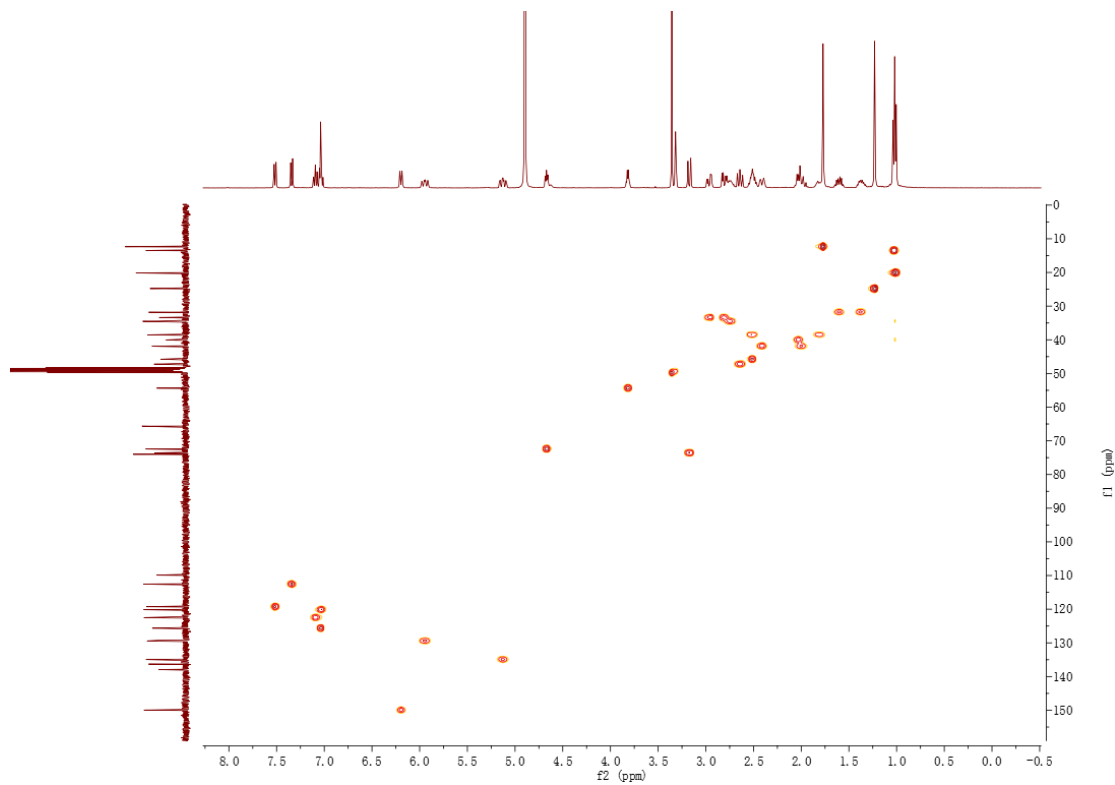

HMBC spectrum of compound 1

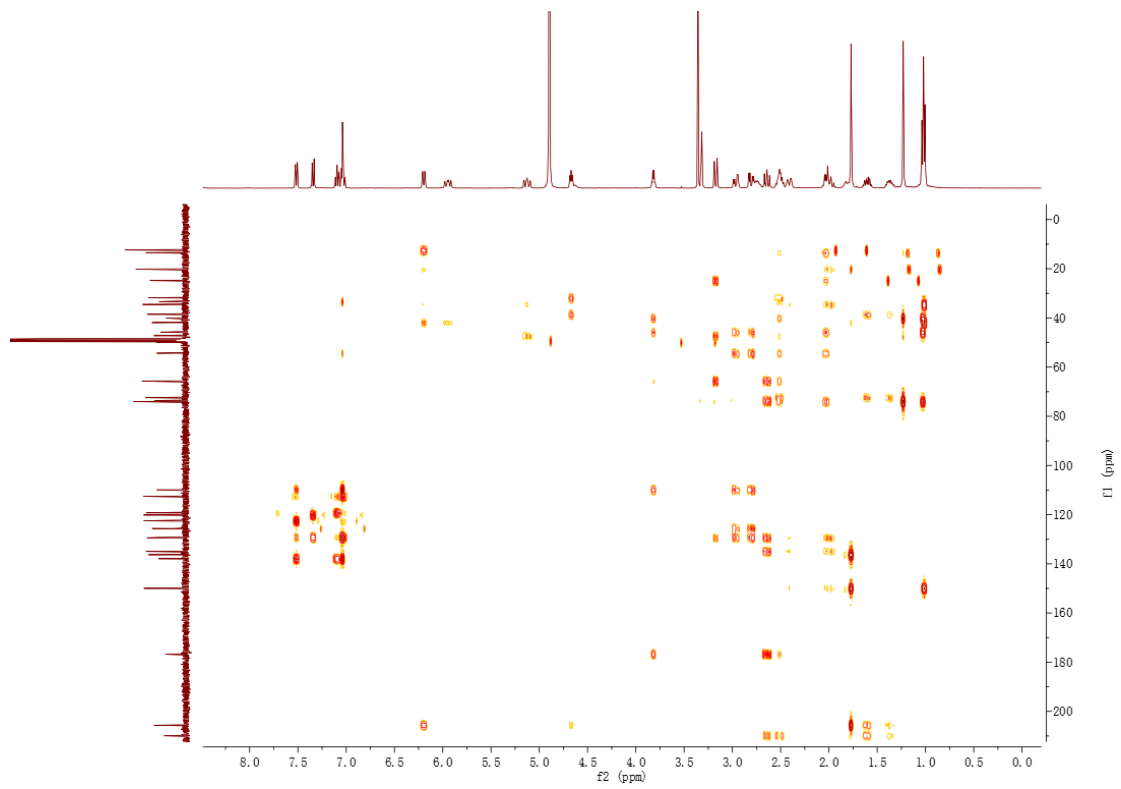

$^1\text{H}$ - $^1\text{H}$  COSY spectrum of compound 1

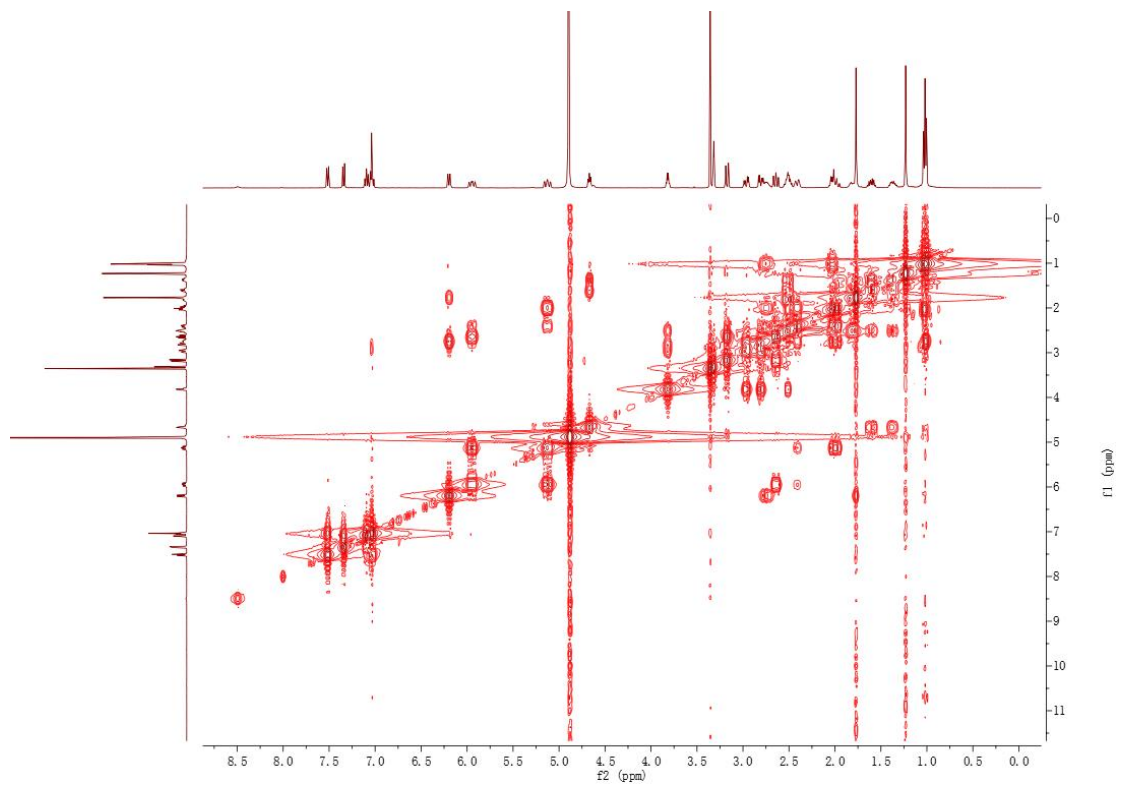

NOESY spectrum of compound 1

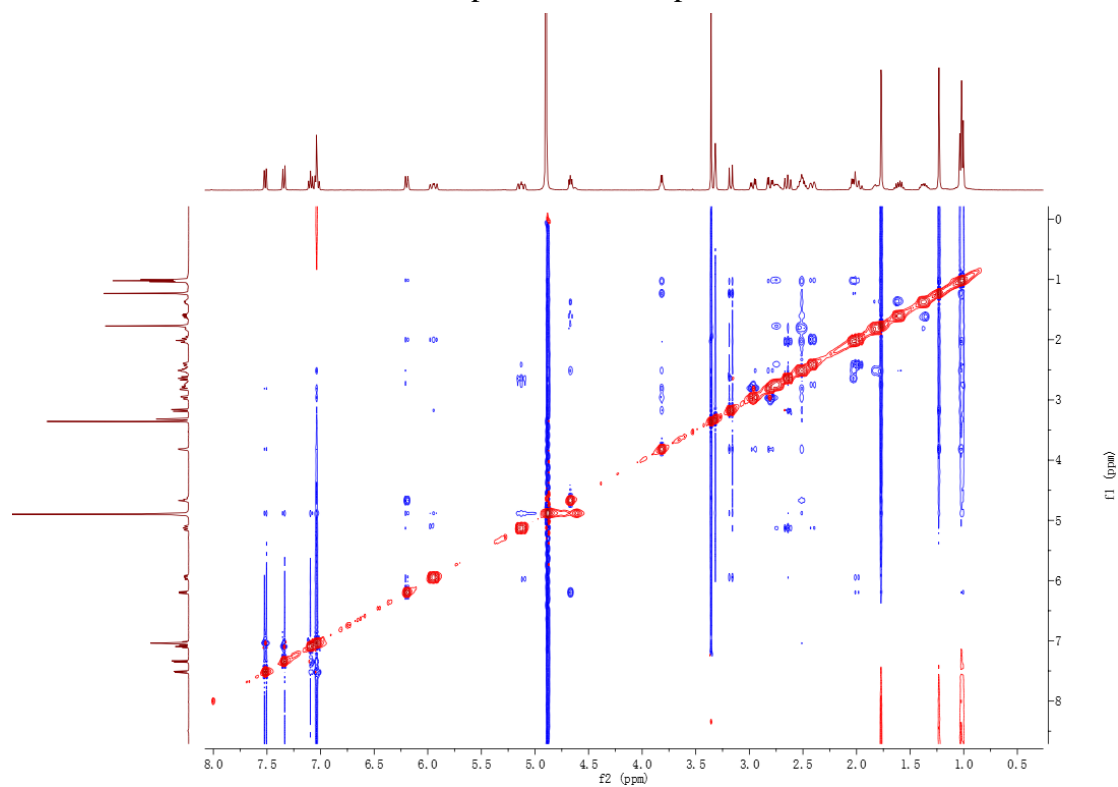

UV spectrum of compound 2

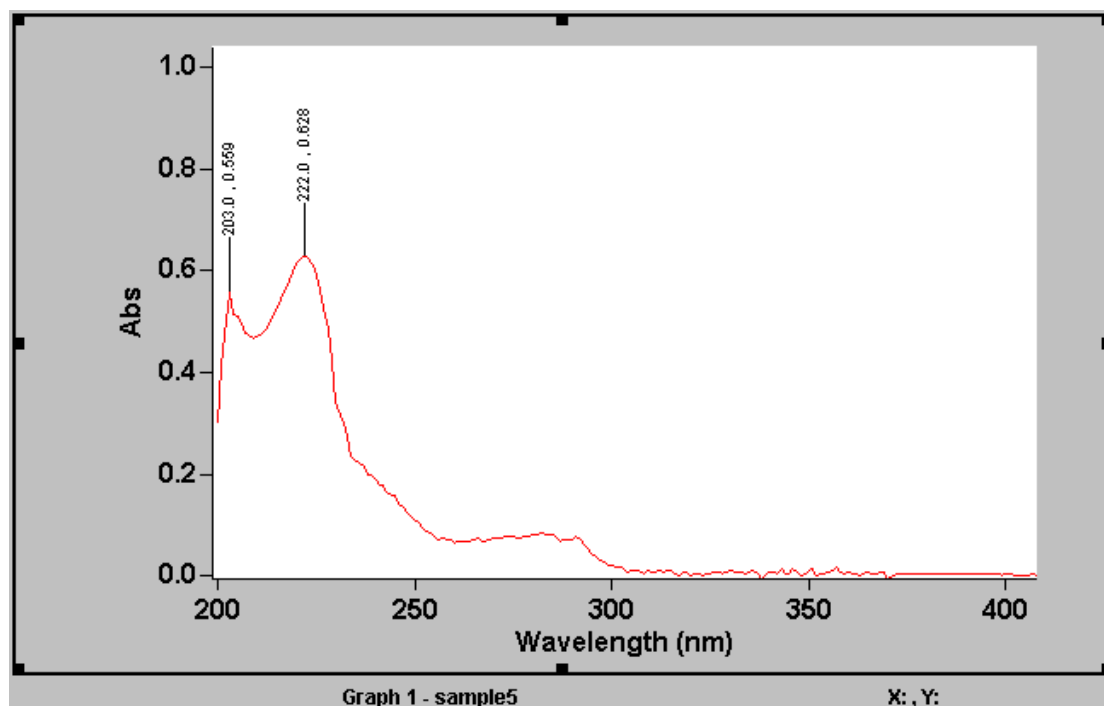



## IR spectrum of compound 2

E:\同济医学院\张勇慧\20140325\CG2-79-2.0

仪器型号: Bruker Vertex 70

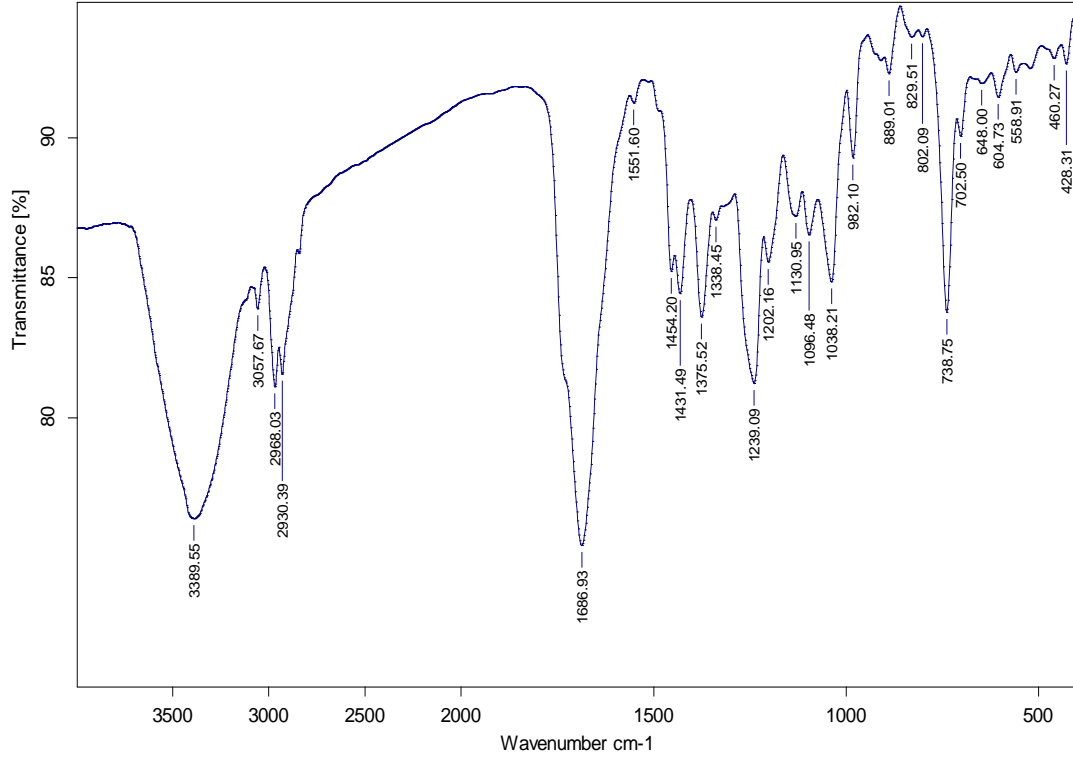

## HRESIMS spectrum of compound 2

CCM2-79-2 #22 RT: 0.31 AV: 1 NL: 1.65E7

T: FTMS + p ESI Full ms [50.00-1500.00]

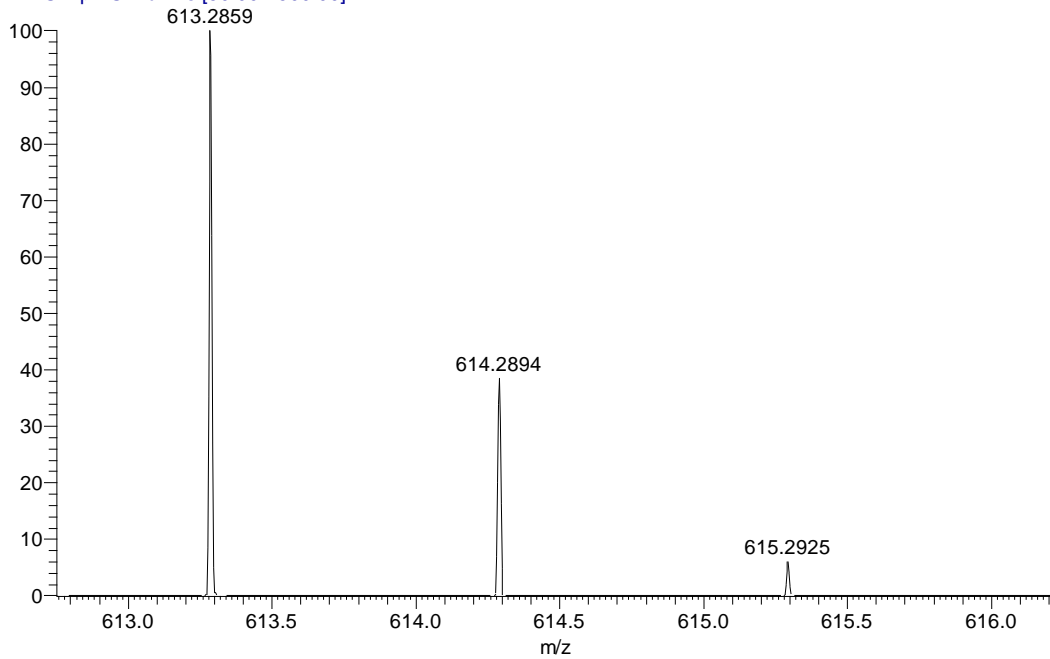

### <sup>1</sup>H NMR spectrum of compound 2

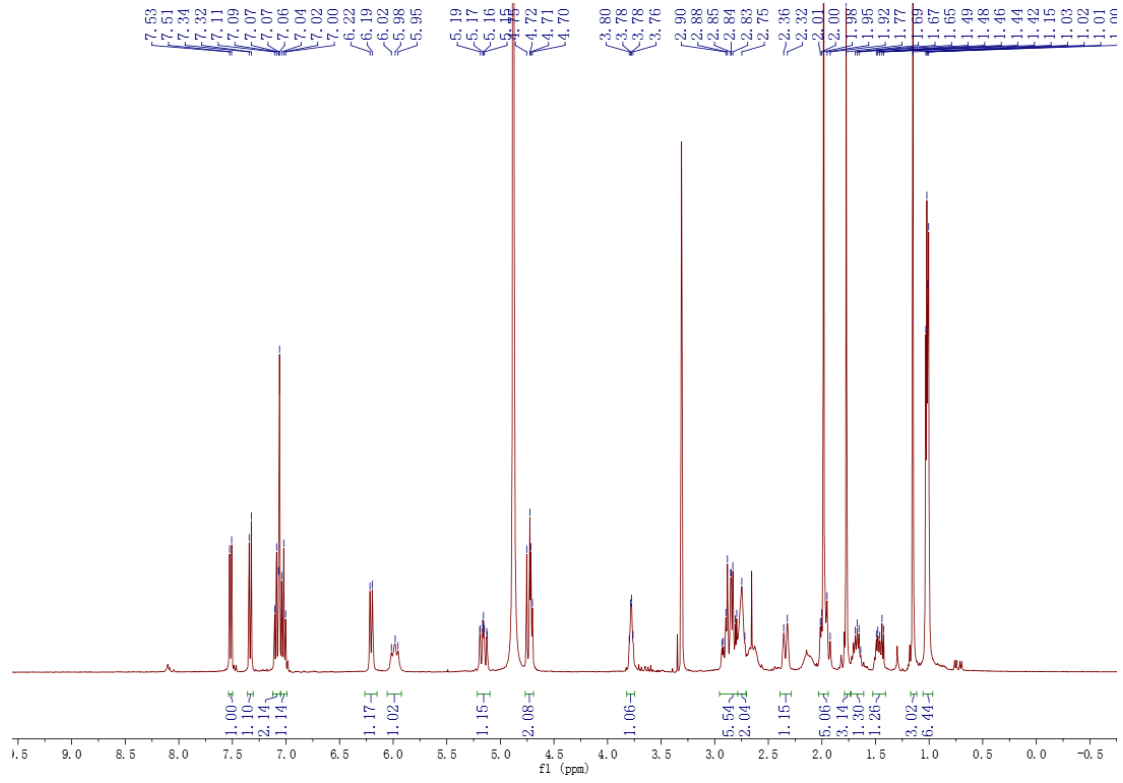

### <sup>13</sup>C NMR and DEPT spectra of compound 2

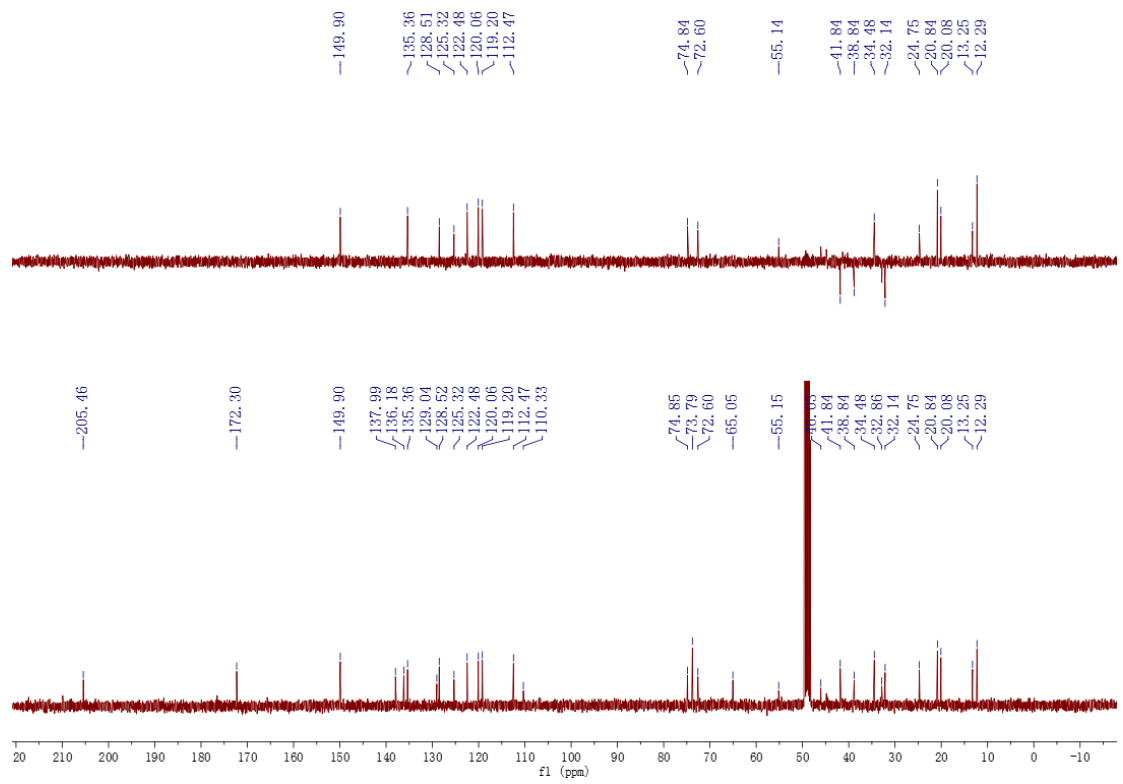

HSQC spectrum of compound 2

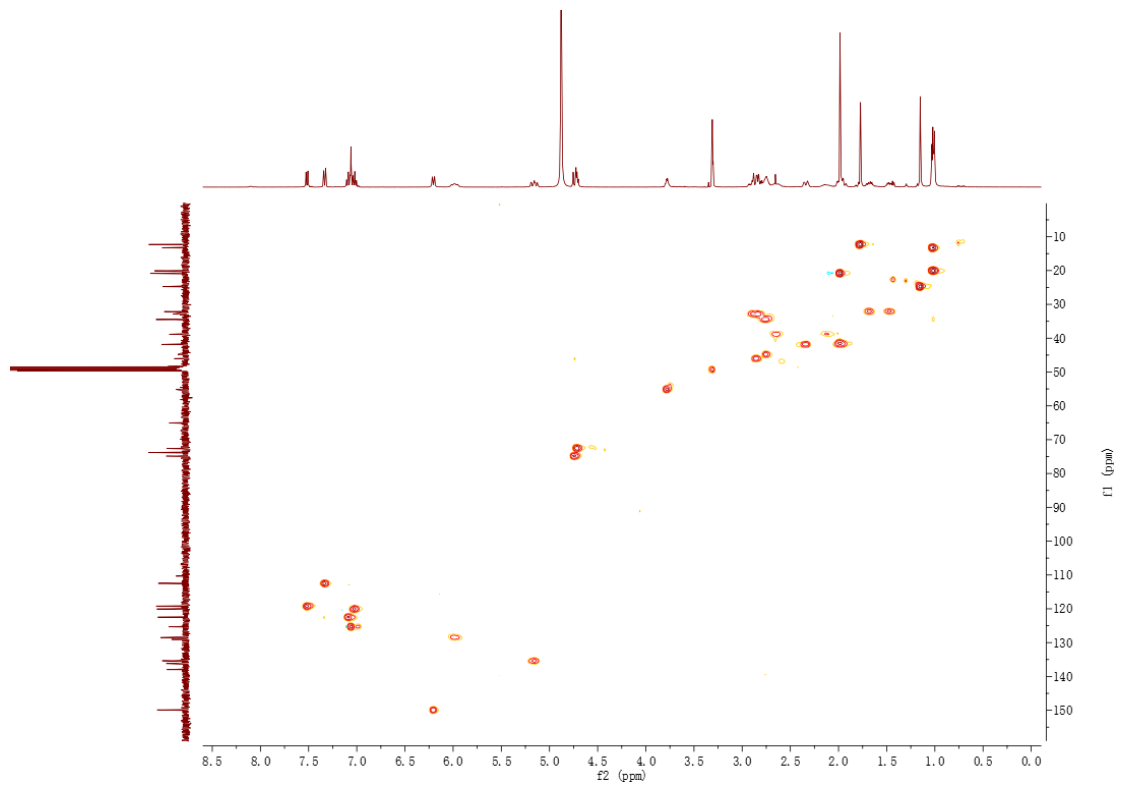

HMBC spectrum of compound 2

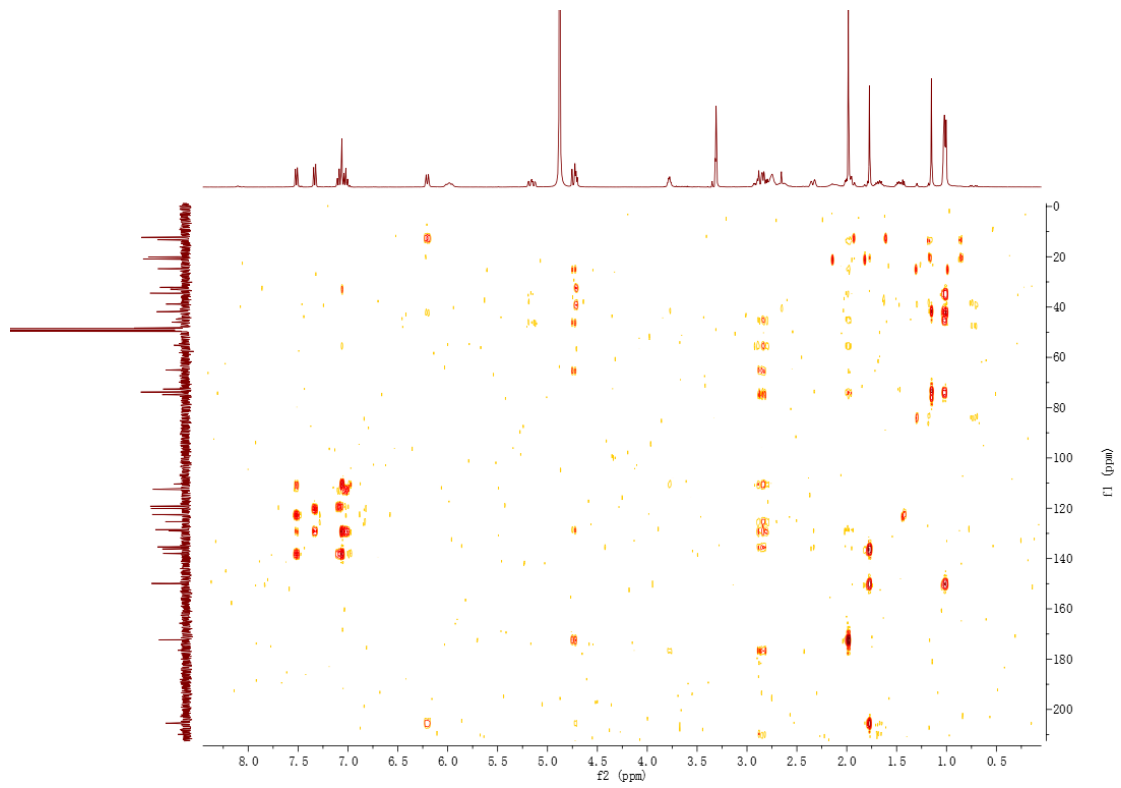

### $^1\text{H}$ - $^1\text{H}$ COSY spectrum of compound 2

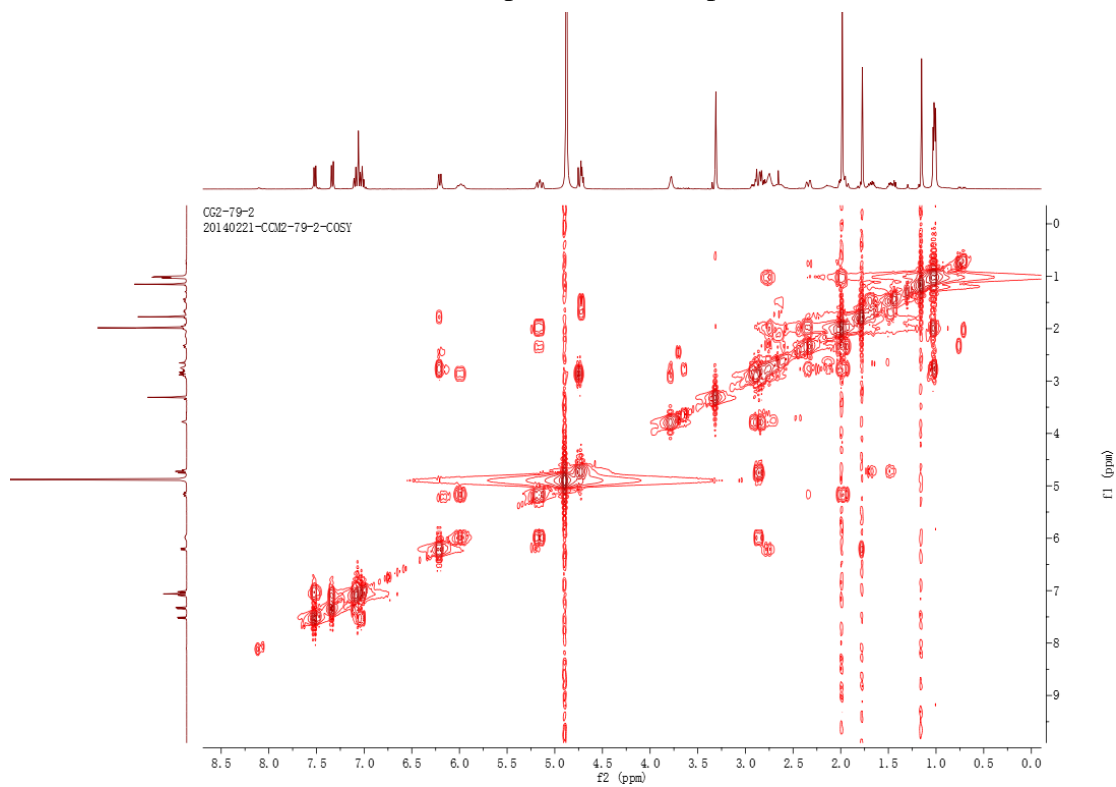

### NOESY spectrum of compound 2

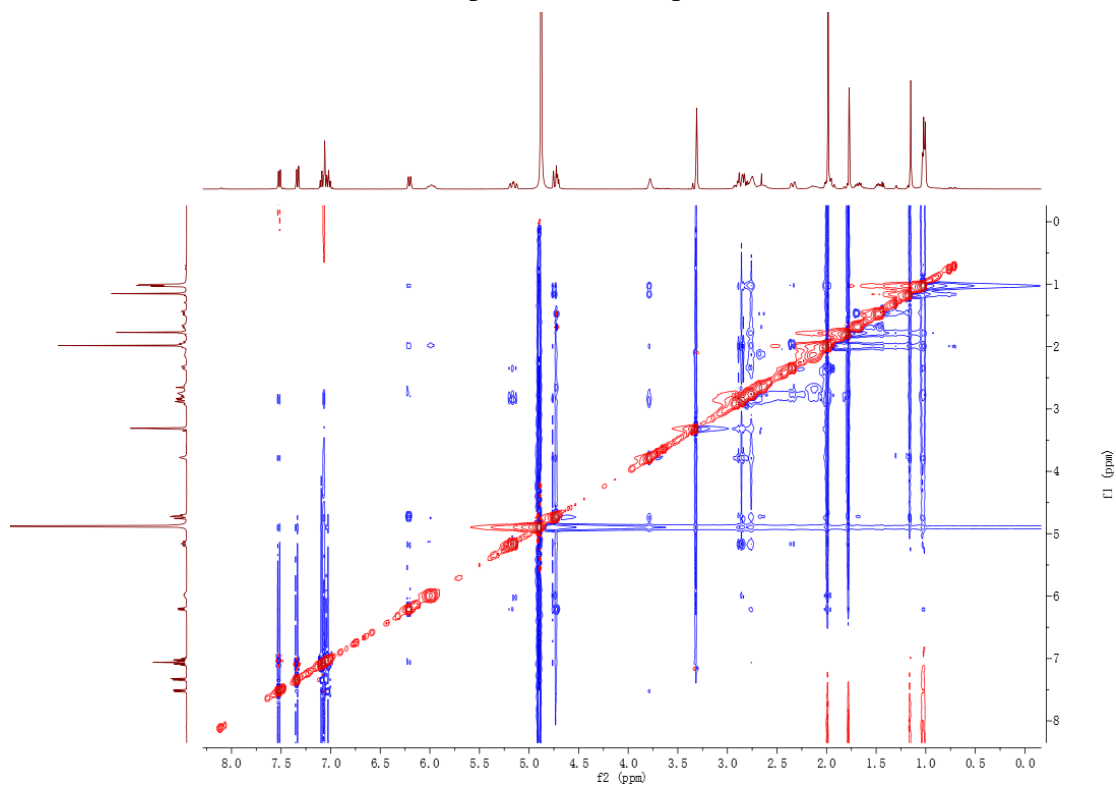

### UV spectrum of compound 3

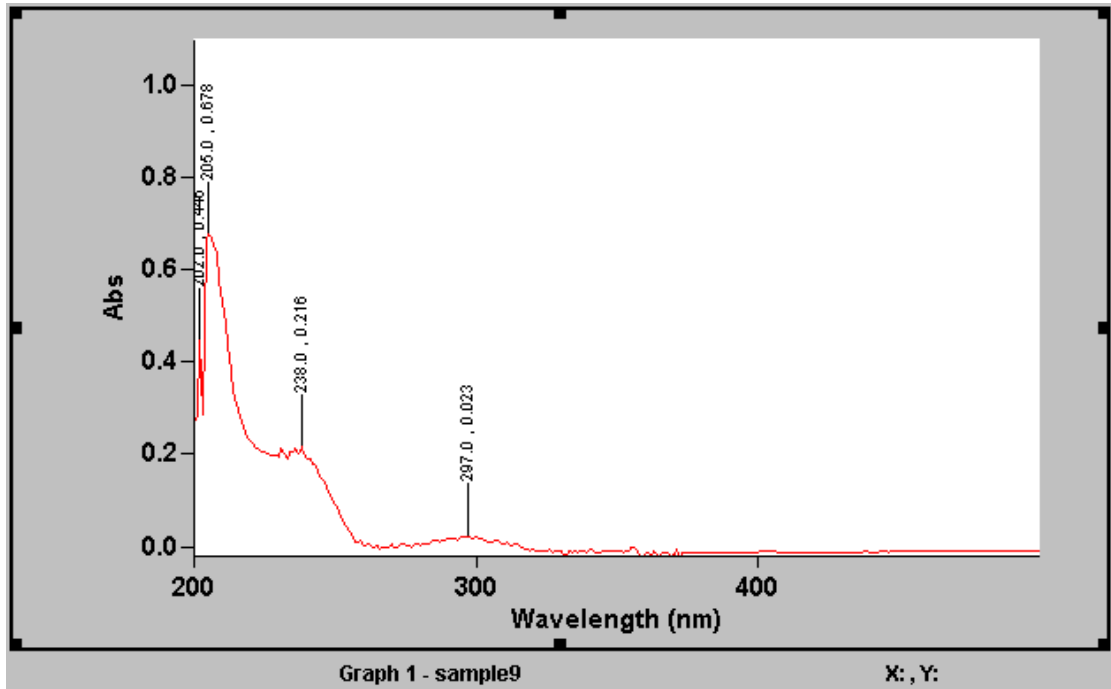

### IR spectrum of compound 3

E:\同济医学院\张勇慧\20140617\001.6

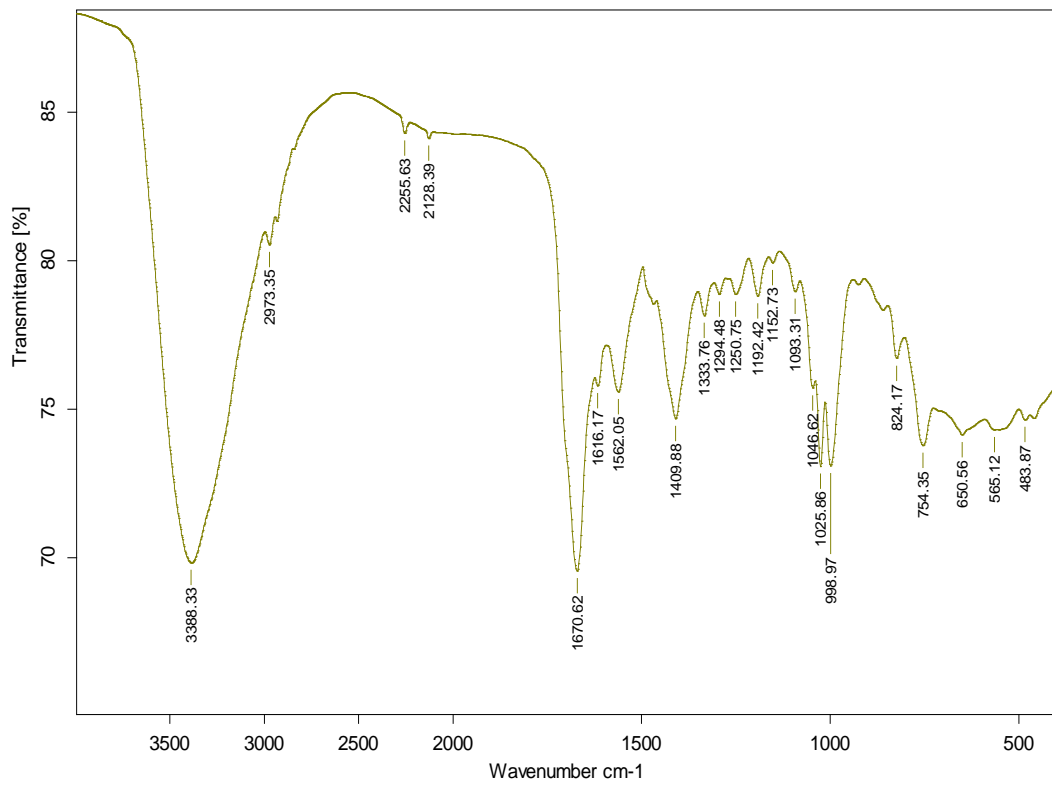

### HRESIMS spectrum of compound **3**

CCM2-87-22 #13 RT: 0.19 AV: 1 NL: 2.31E6  
T: FTMS + p ESI Full ms [50.00-1500.00]

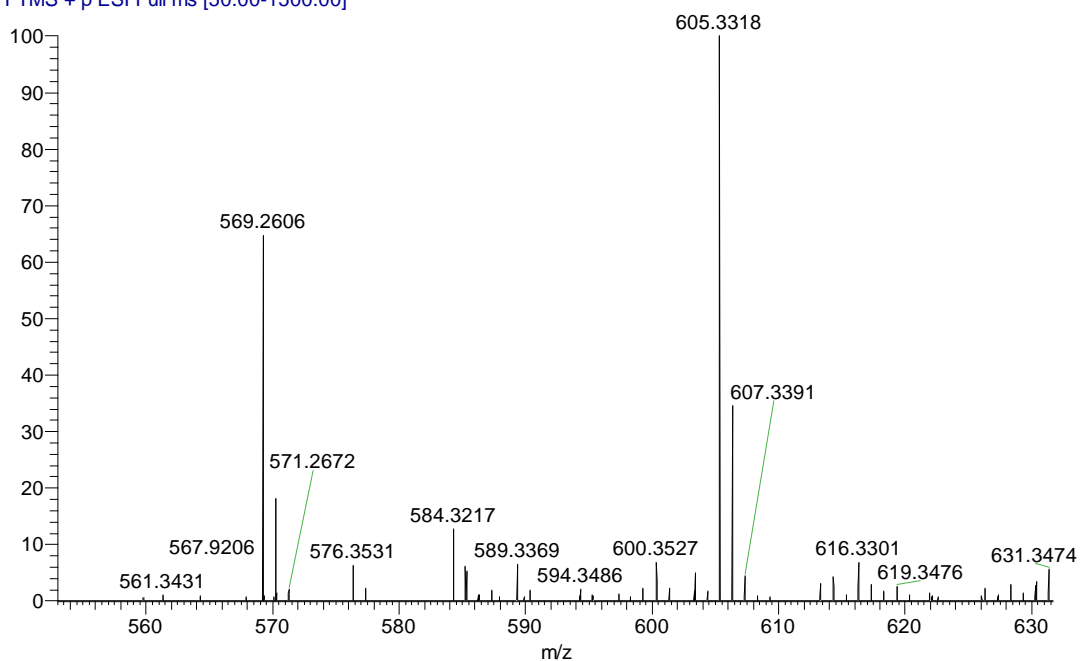

### <sup>1</sup>H NMR spectrum of compound **3**

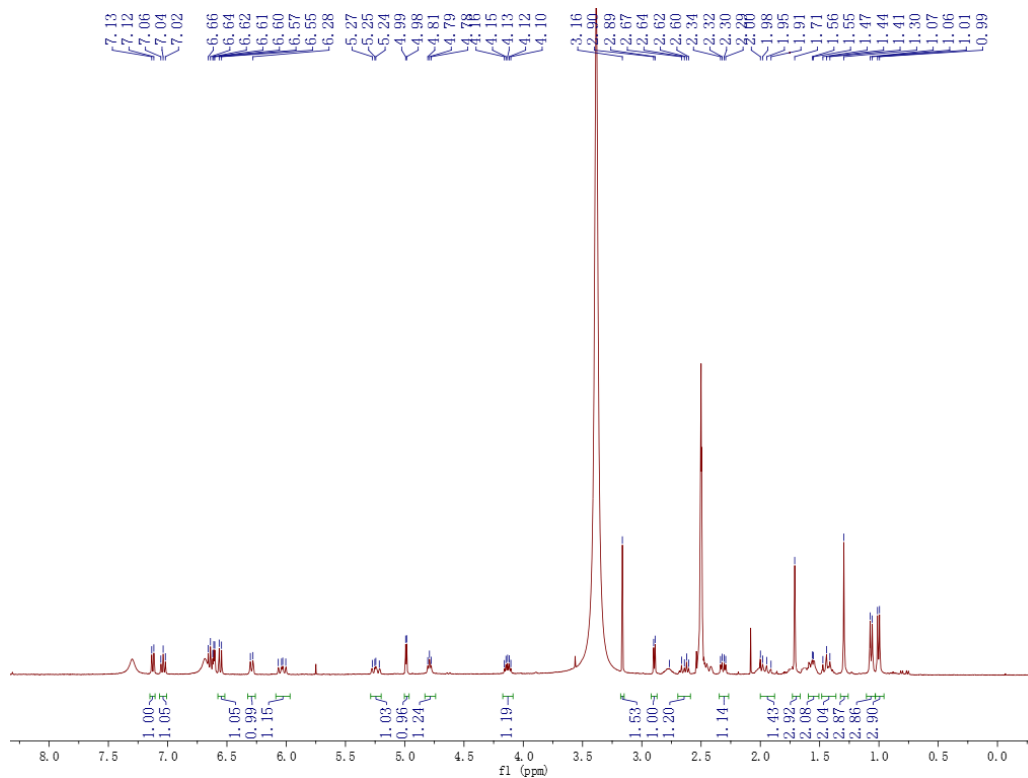

### $^{13}\text{C}$ NMR and DEPT spectra of compound 3

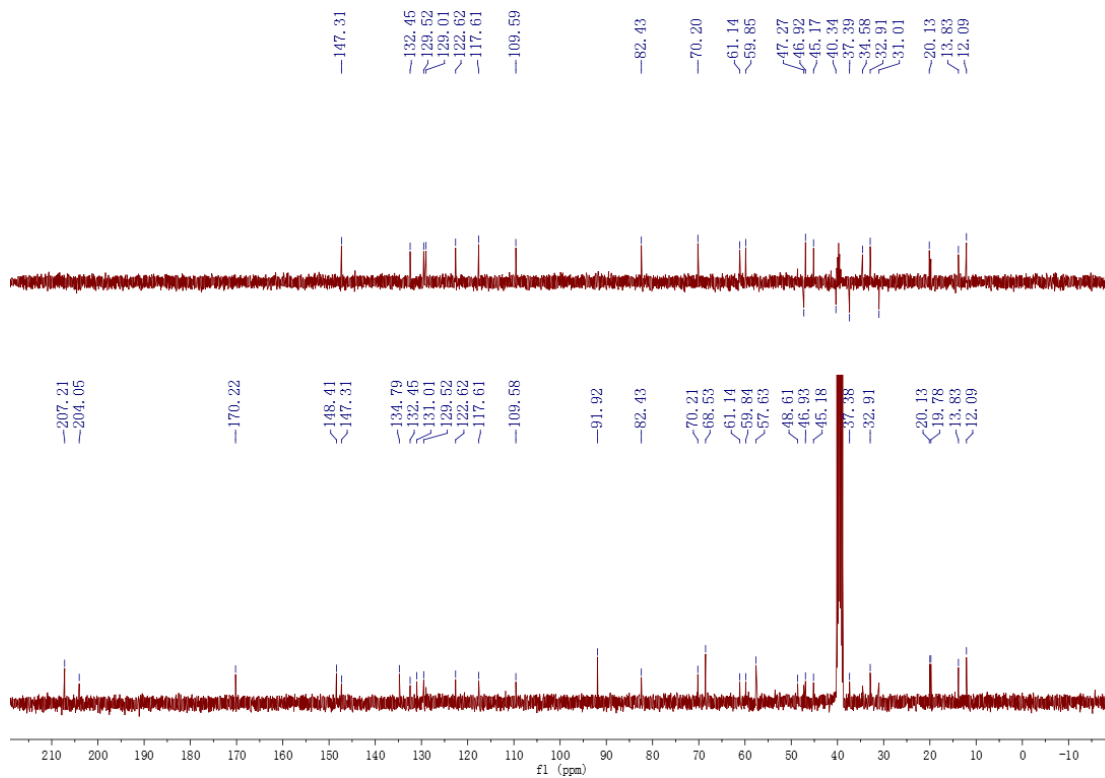

### HSQC spectrum of compound 3

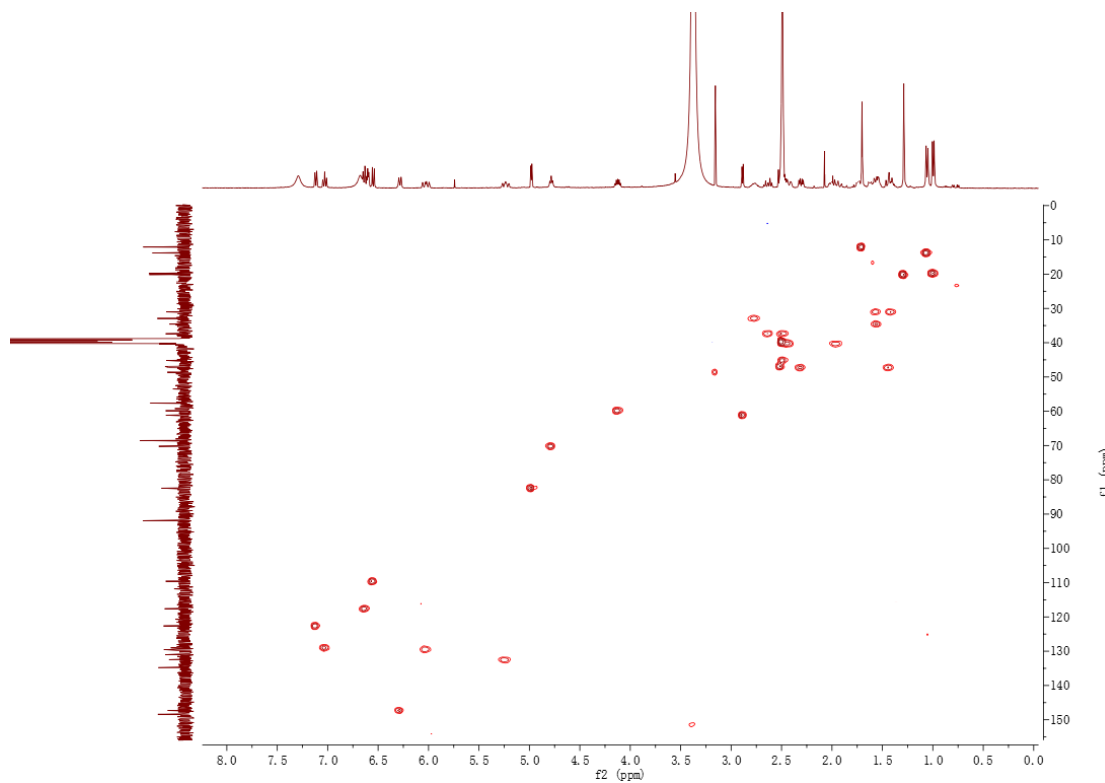

HMBC spectrum of compound **3**

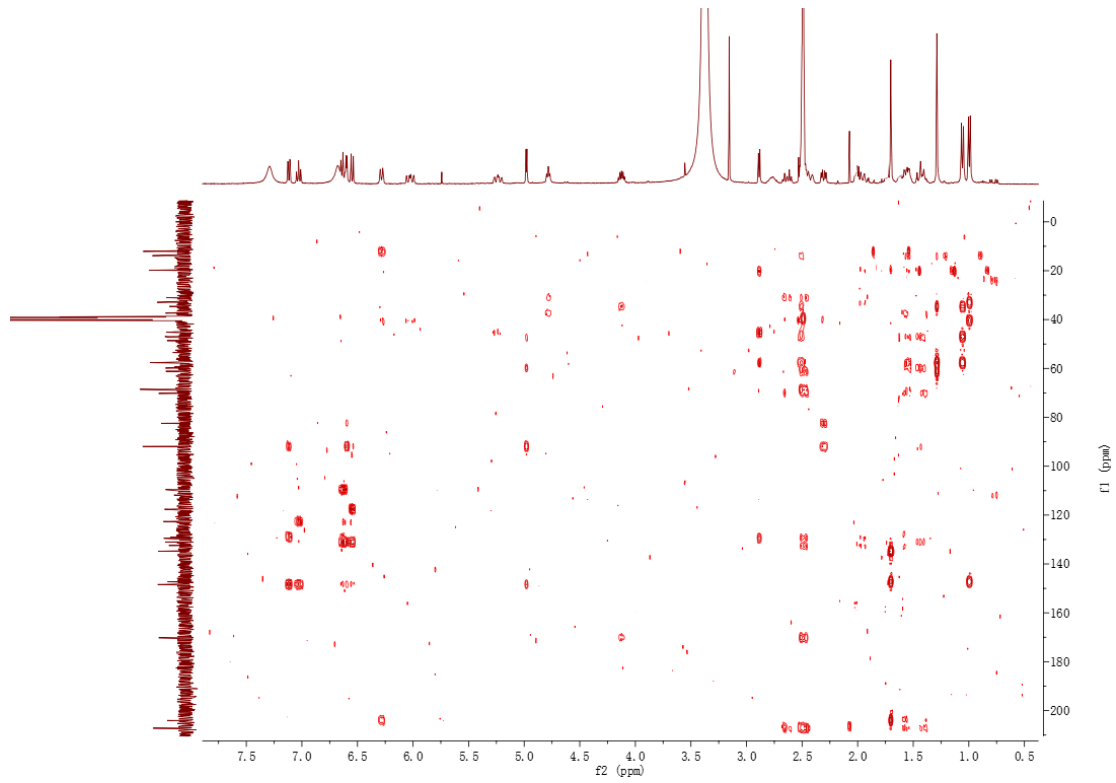

$^1\text{H}$ - $^1\text{H}$  COSY spectrum of compound **3**

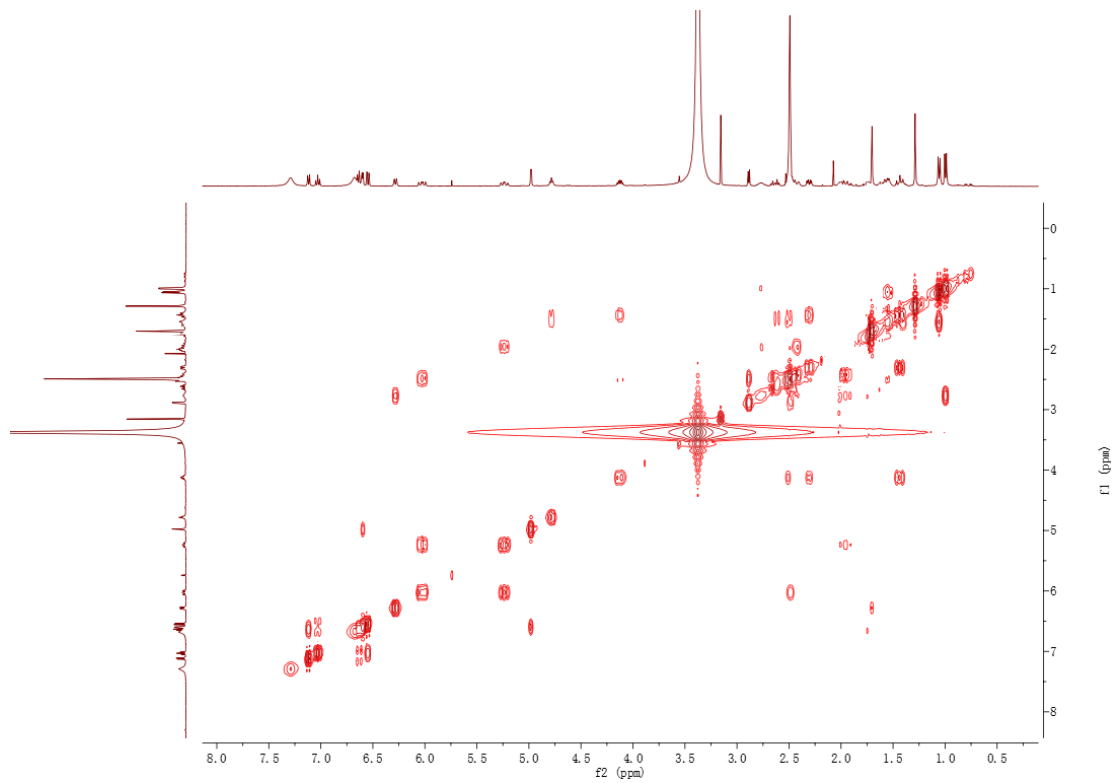



NOESY spectrum of compound 3

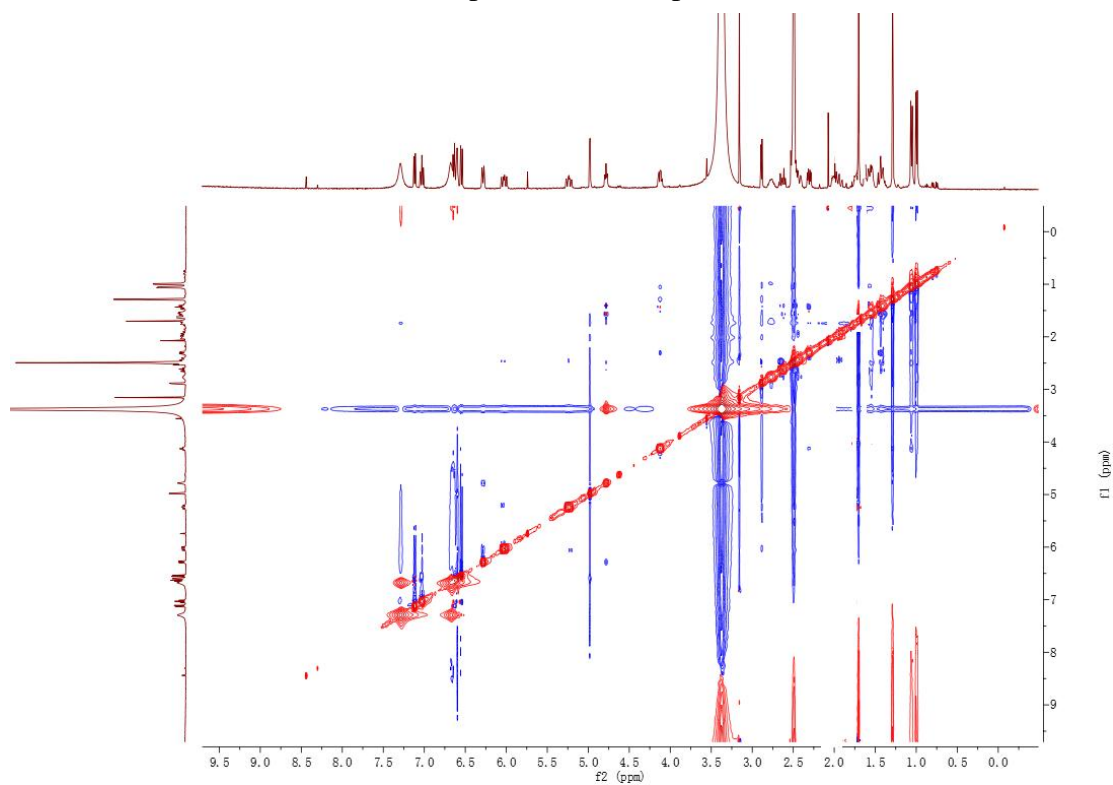

UV spectrum of compound 4

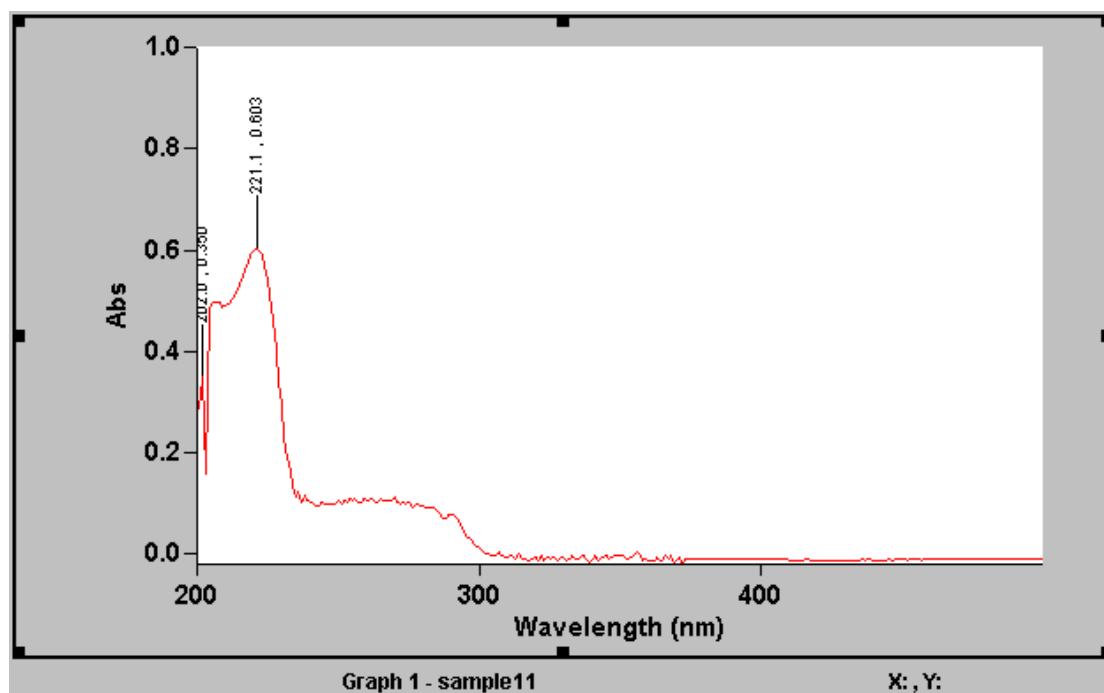

### IR spectrum of compound 4

E:\同济医学院\张勇慧\20140617\001.8

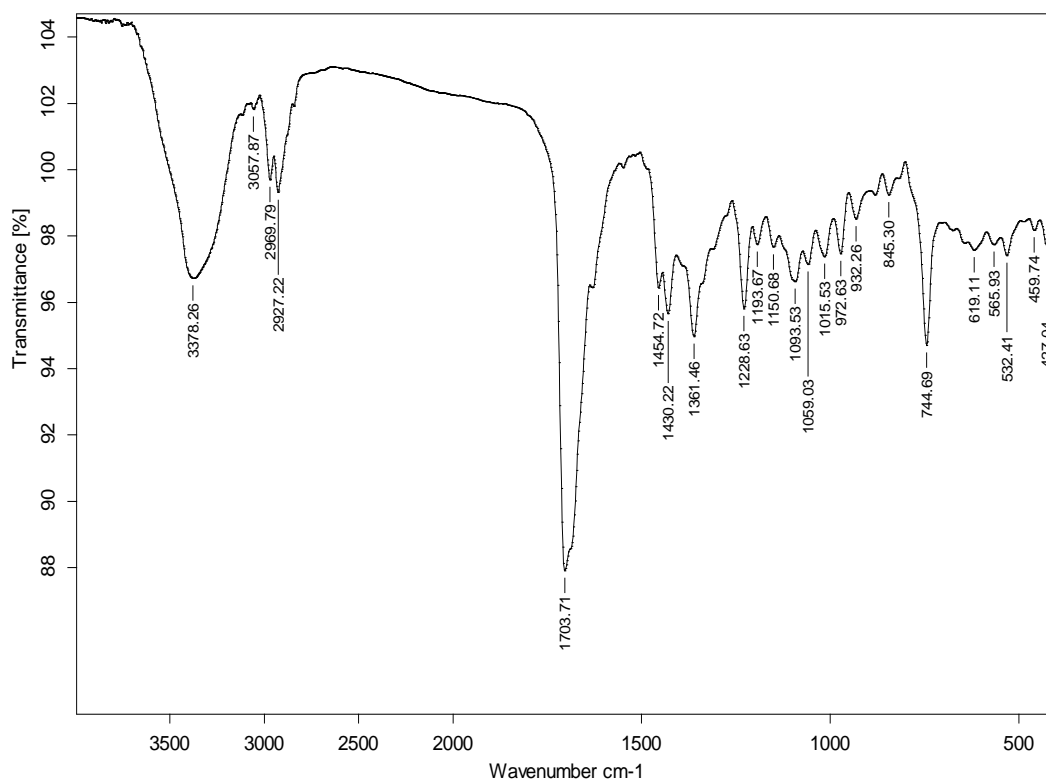

### HRESIMS spectrum of compound 4

CCM2-98-5 #20 RT: 0.29 AV: 1 NL: 4.35E5  
T: FTMS + p ESI Full ms [50.00-1500.00]

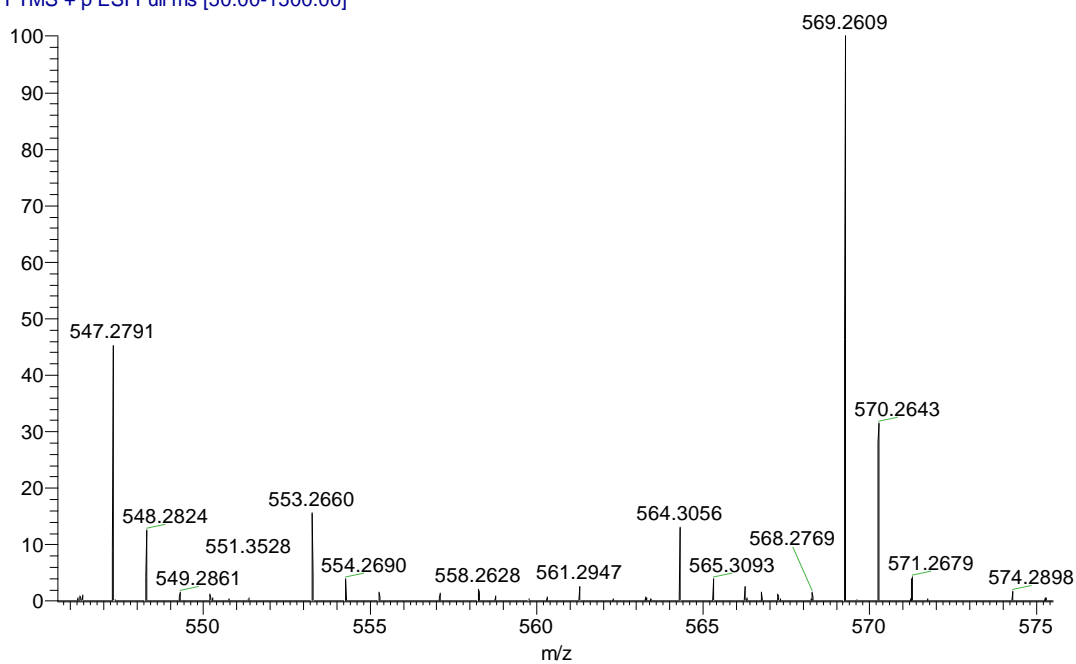

### <sup>1</sup>H NMR spectrum of compound 4

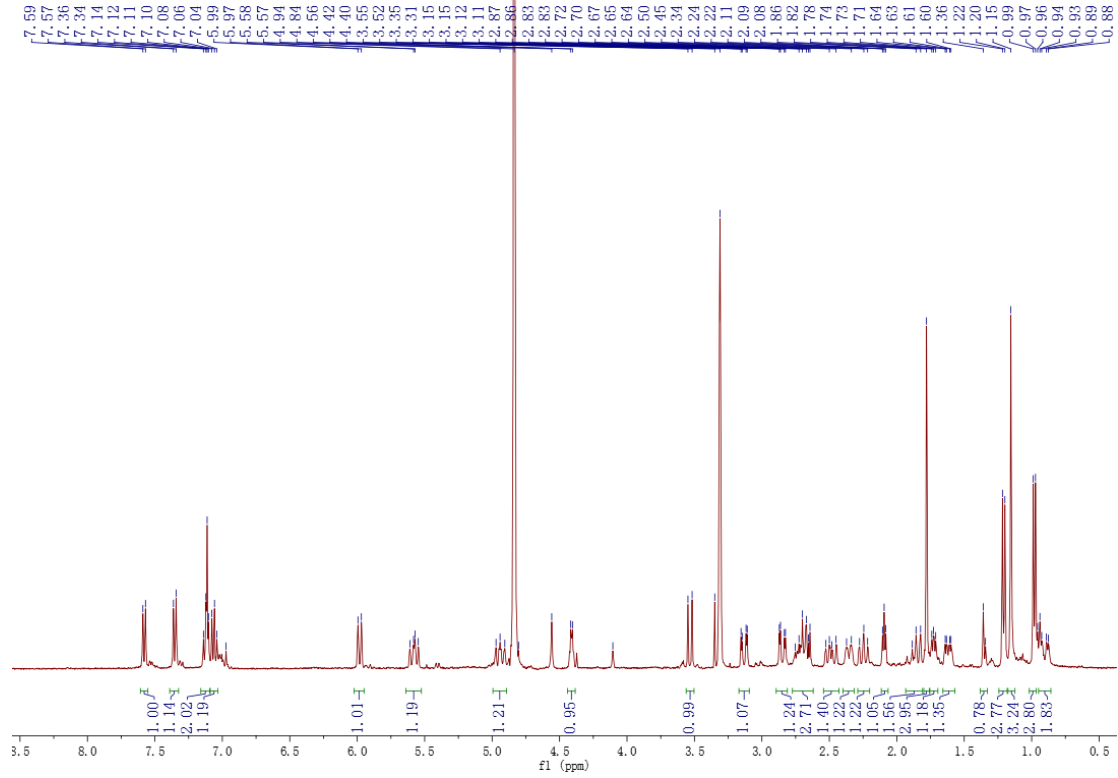

### <sup>13</sup>C NMR and DEPT spectra of compound 4

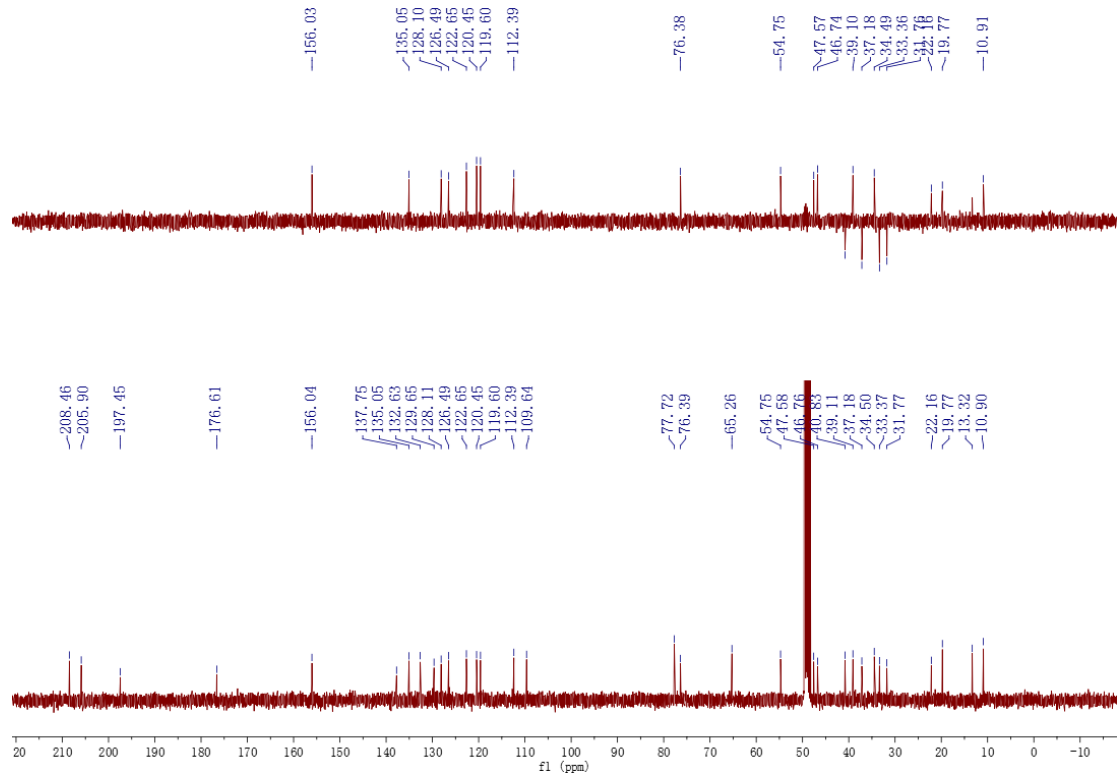

HSQC spectrum of compound **4**

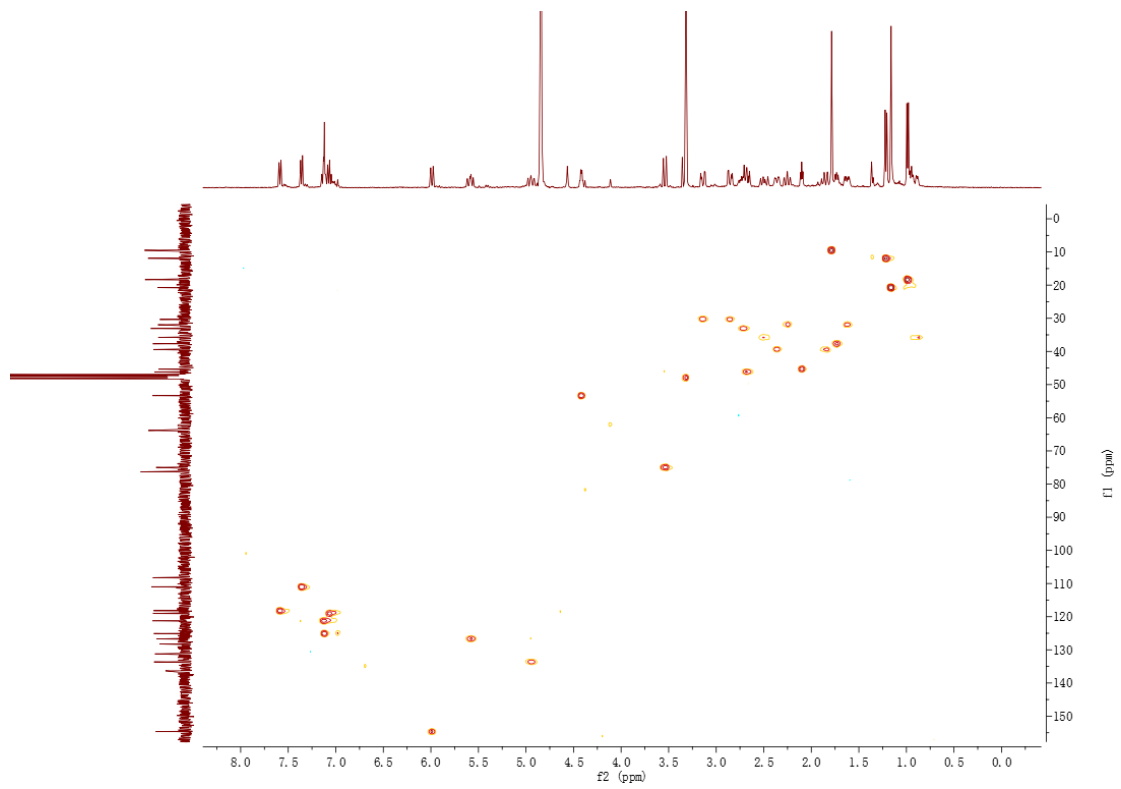

HMBC spectrum of compound **4**

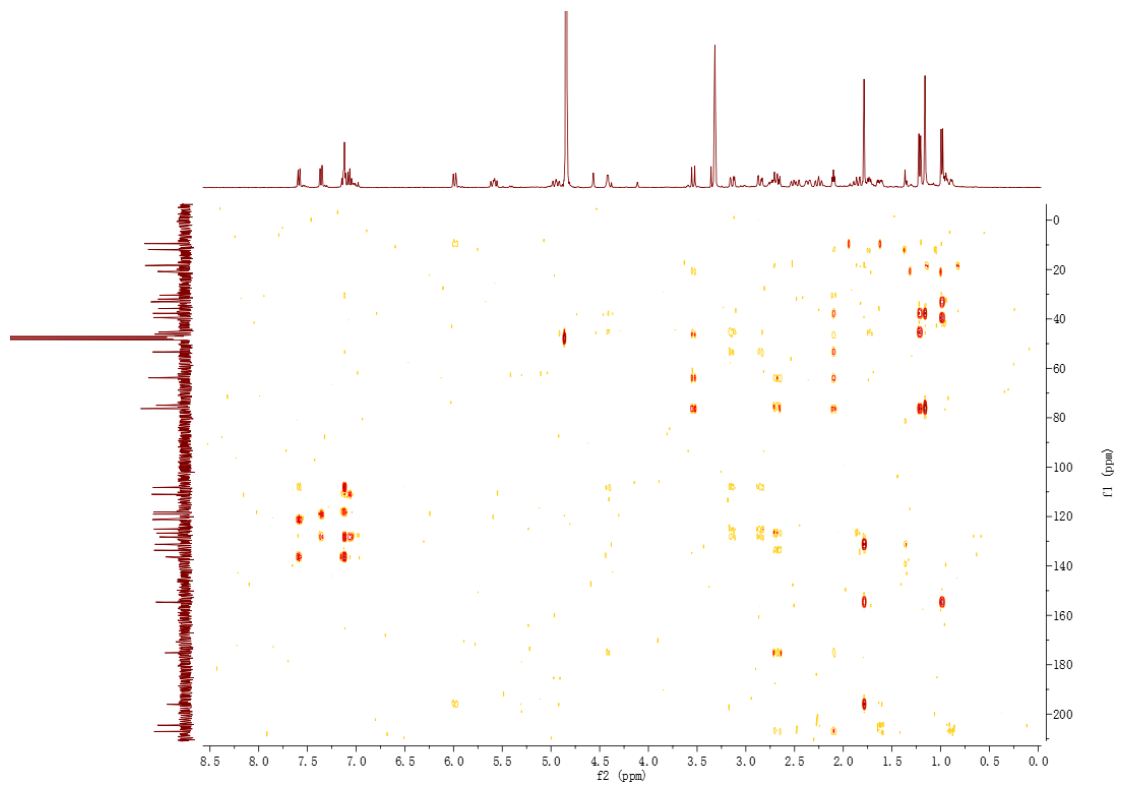

$^1\text{H}$ - $^1\text{H}$  COSY spectrum of compound **4**

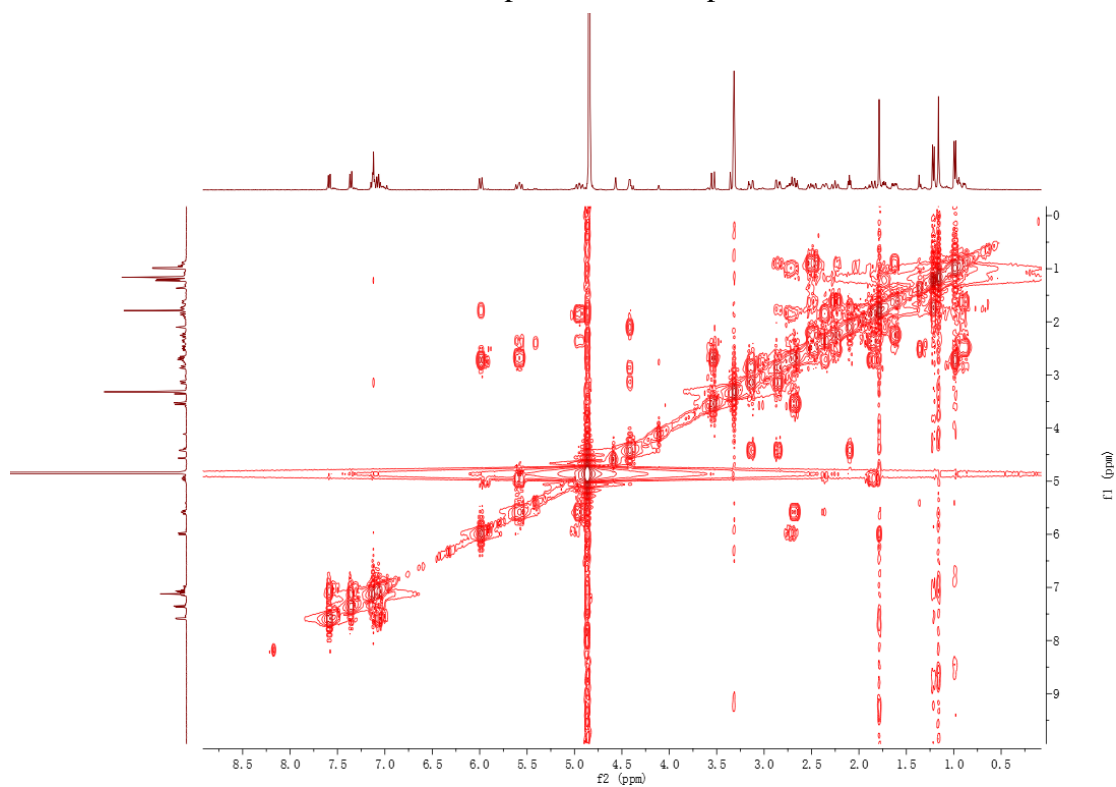

NOESY spectrum of compound **4**

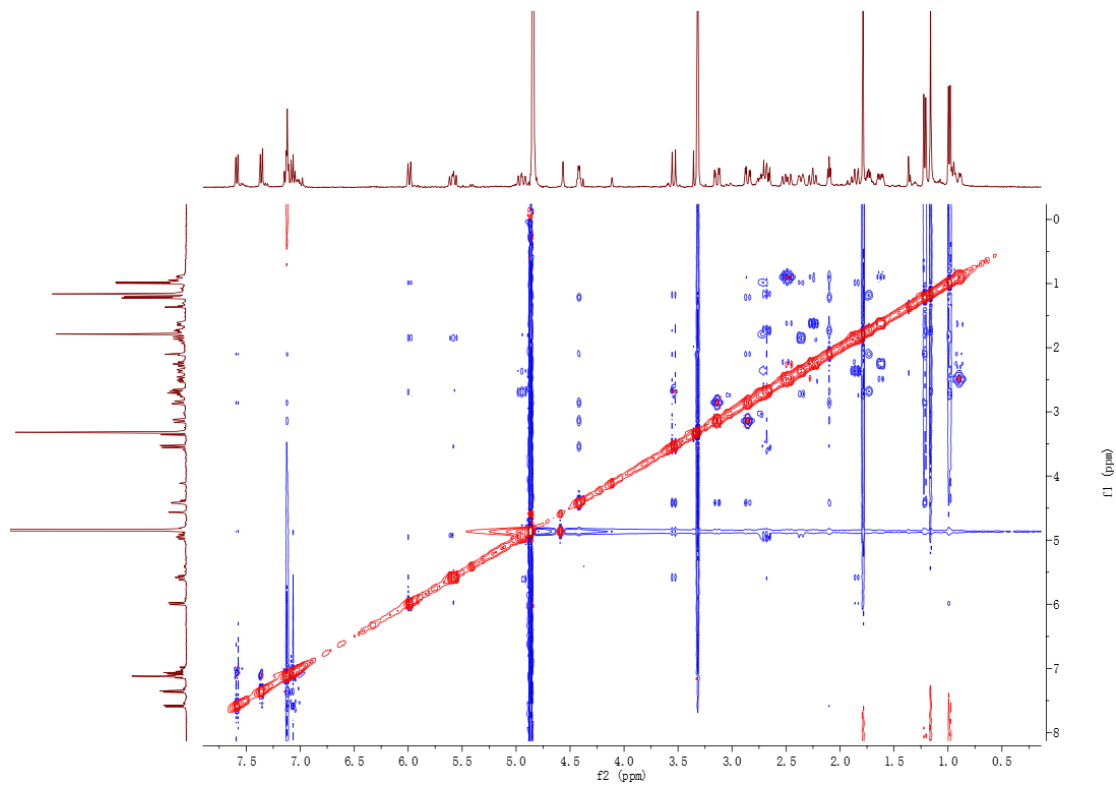

## UV spectrum of compound 5

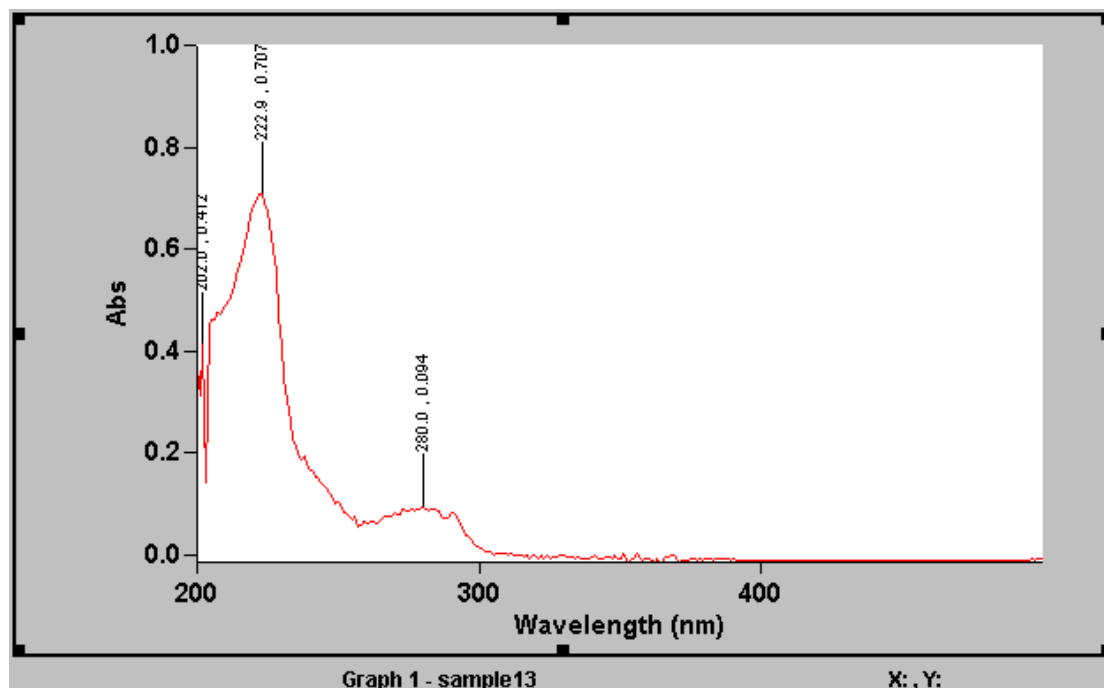

## IR spectrum of compound 5

E:\同济医学院\张勇慧\20131217\2-55-12.0

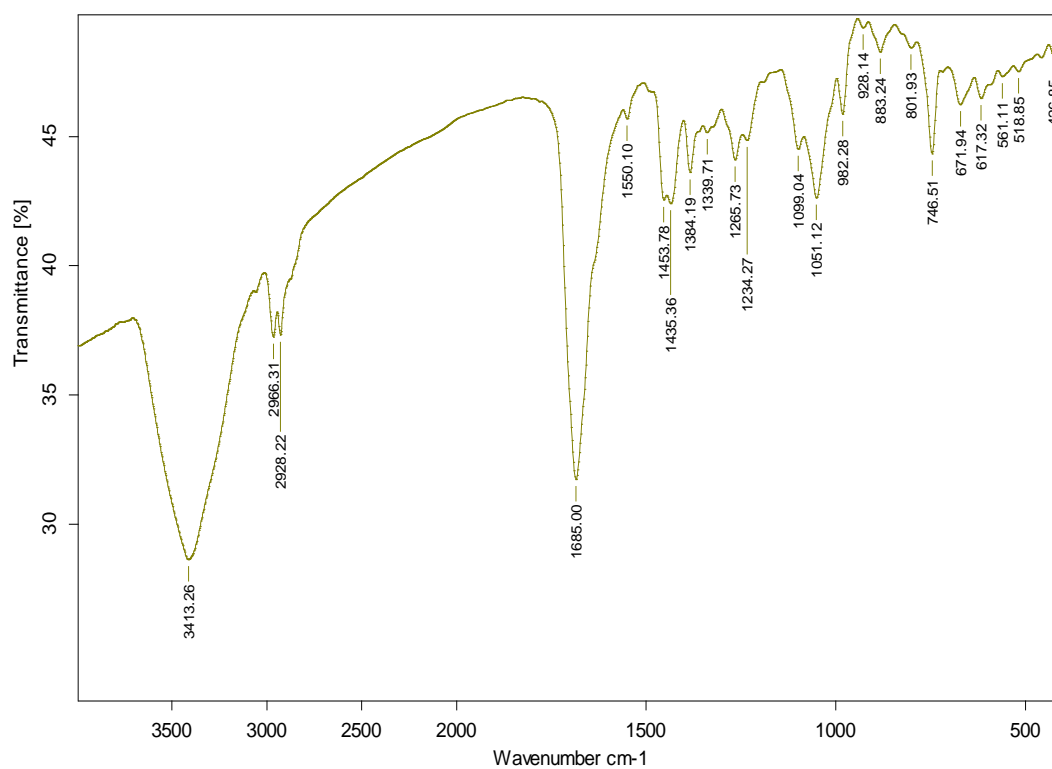

# HRESIMS spectrum of compound 5

CCM2-98-7 #17 RT: 0.25 AV: 1 NL: 1.03E6  
T: FTMS + p ESI Full ms [50.00-1500.00]

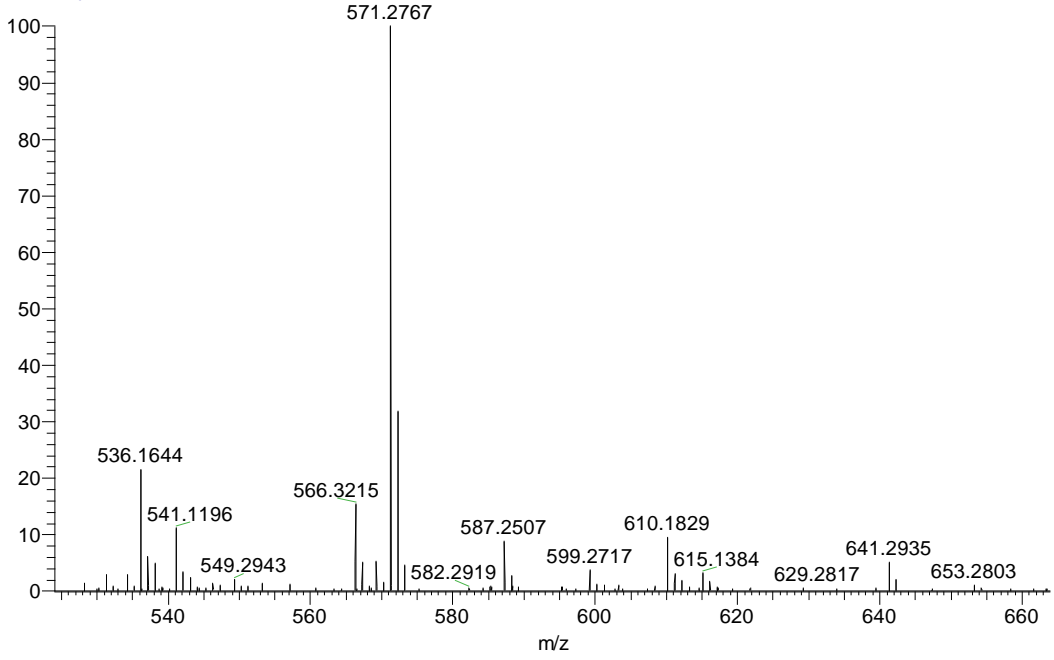

# <sup>1</sup>H NMR spectrum of compound 5

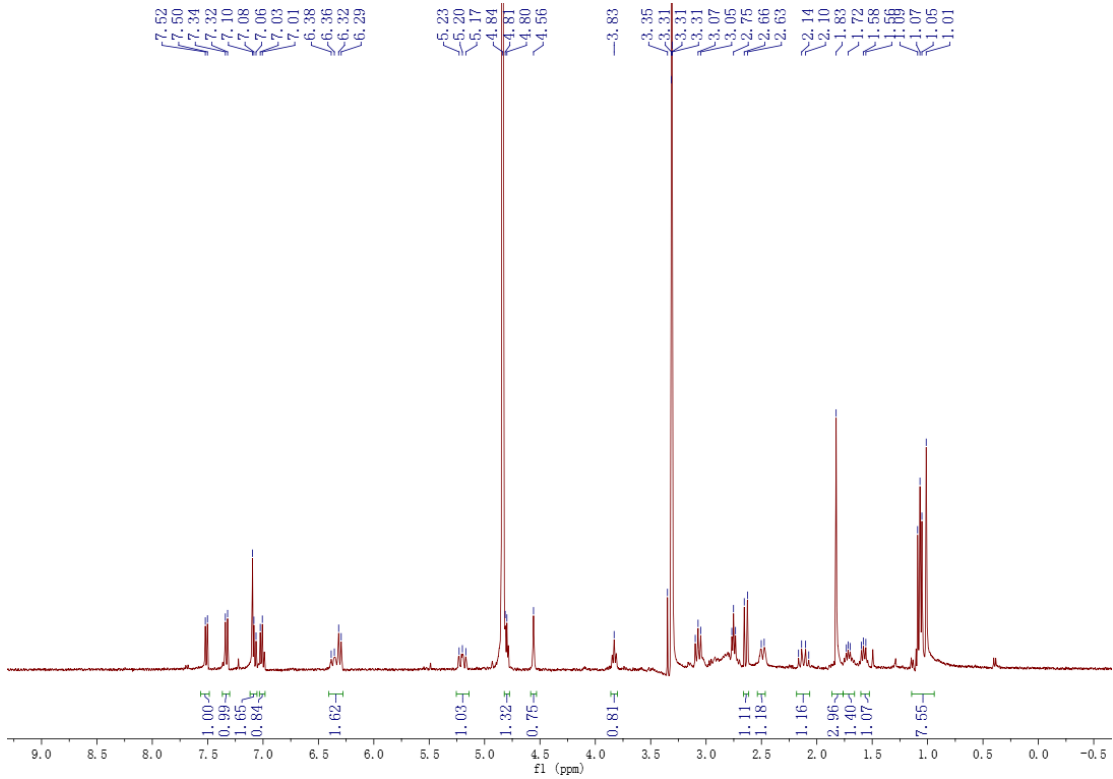

### <sup>13</sup>C NMR and DEPT spectra of compound 5

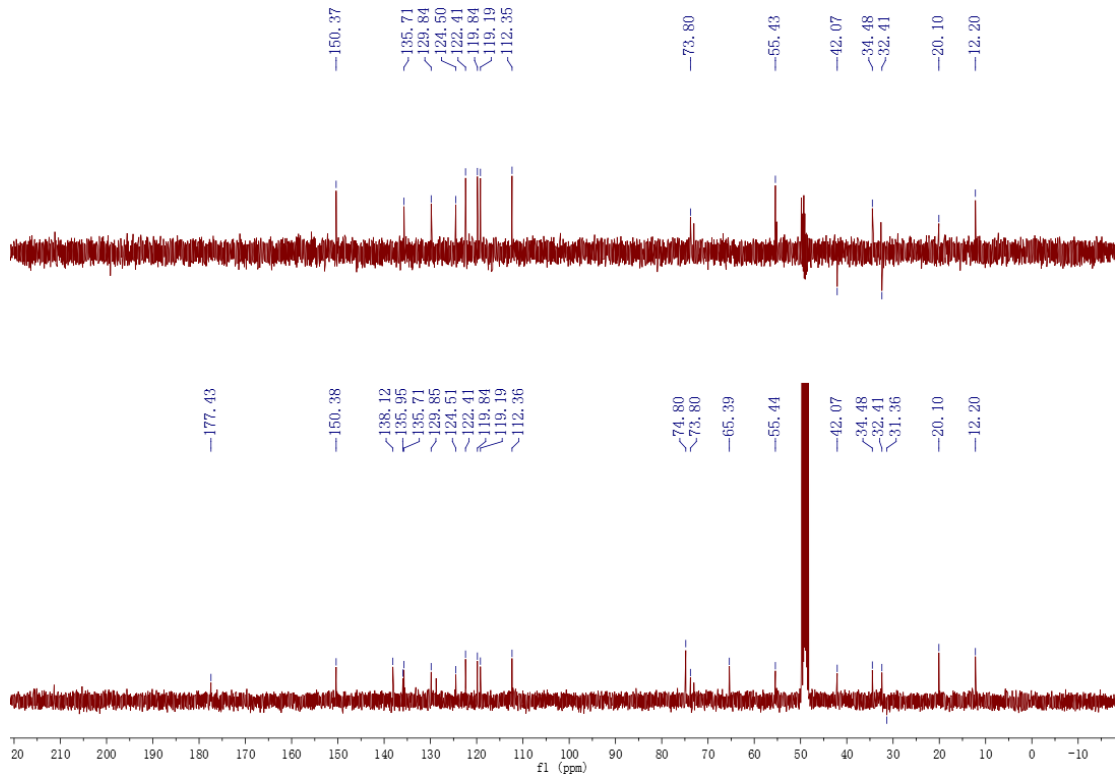

### HSQC spectrum of compound 5

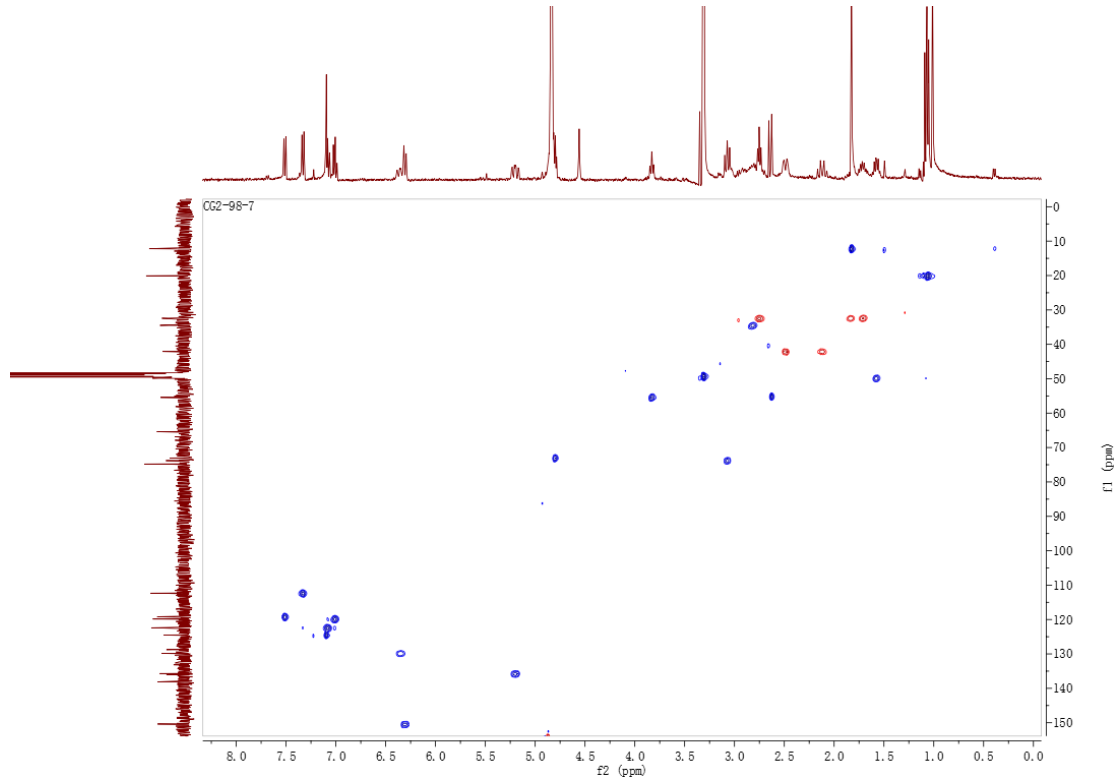



HMBC spectrum of compound 5

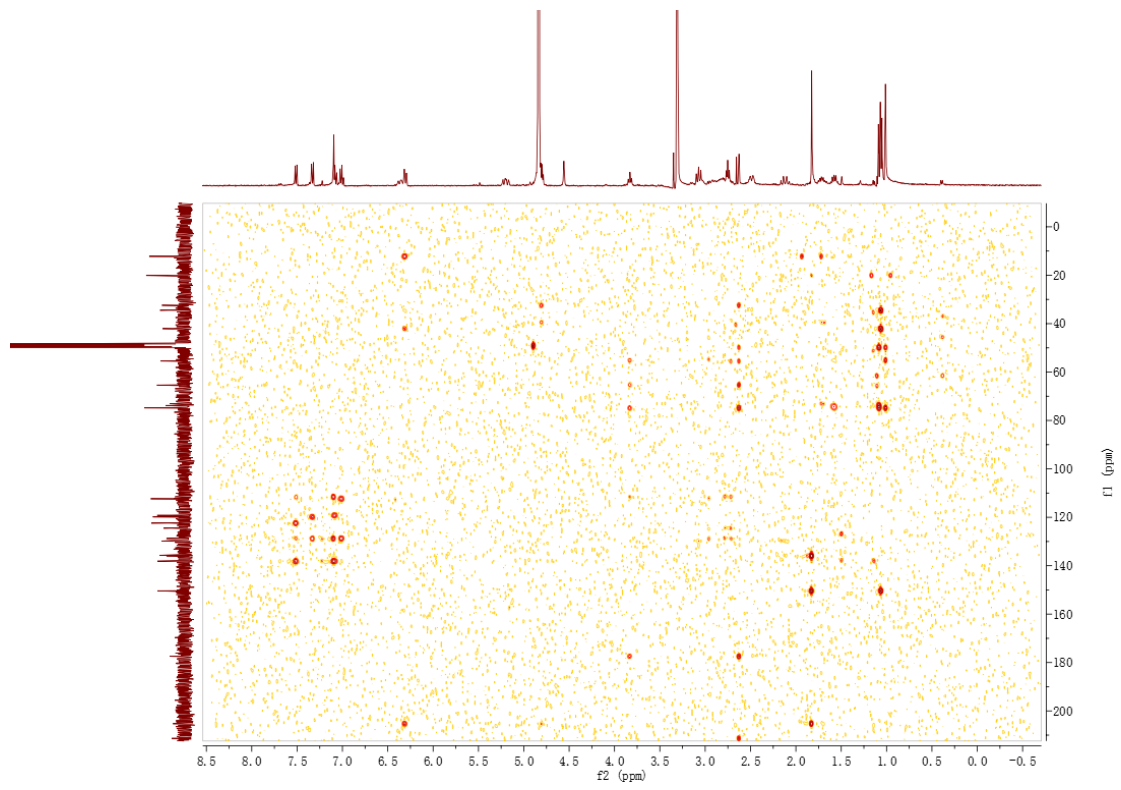

$^1\text{H}$ - $^1\text{H}$  COSY spectrum of compound 5

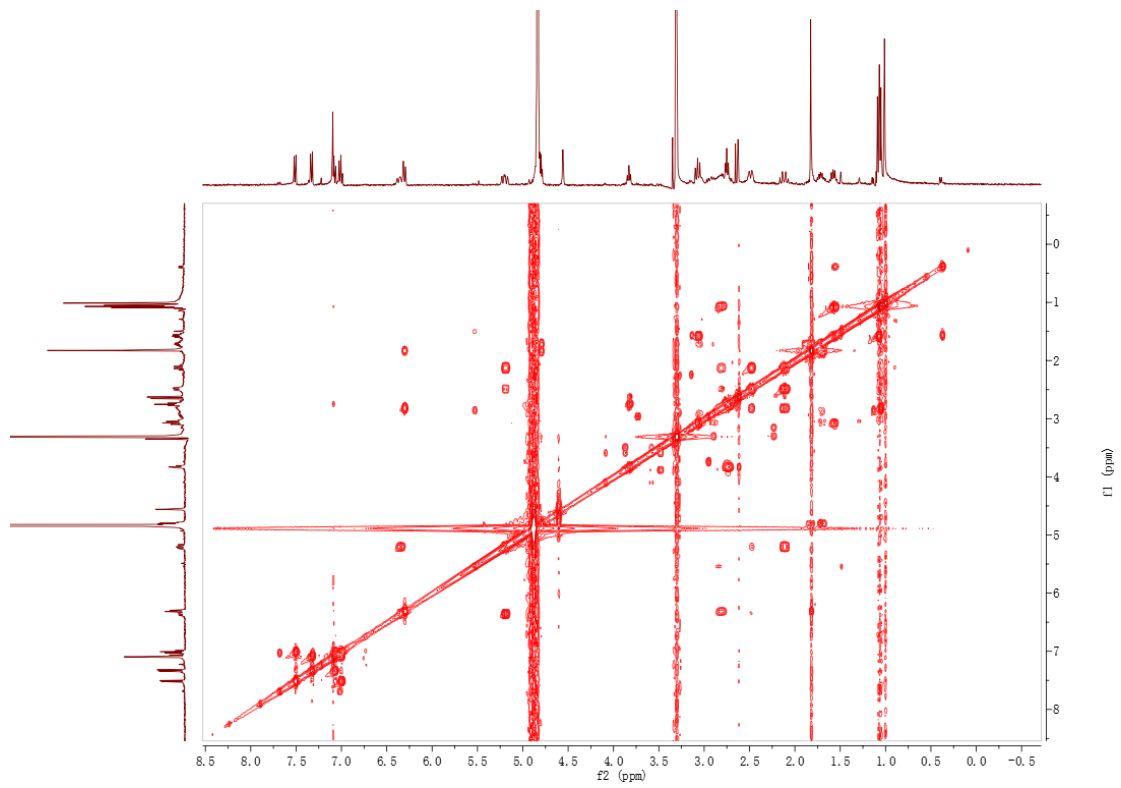

NOESY spectrum of compound 5

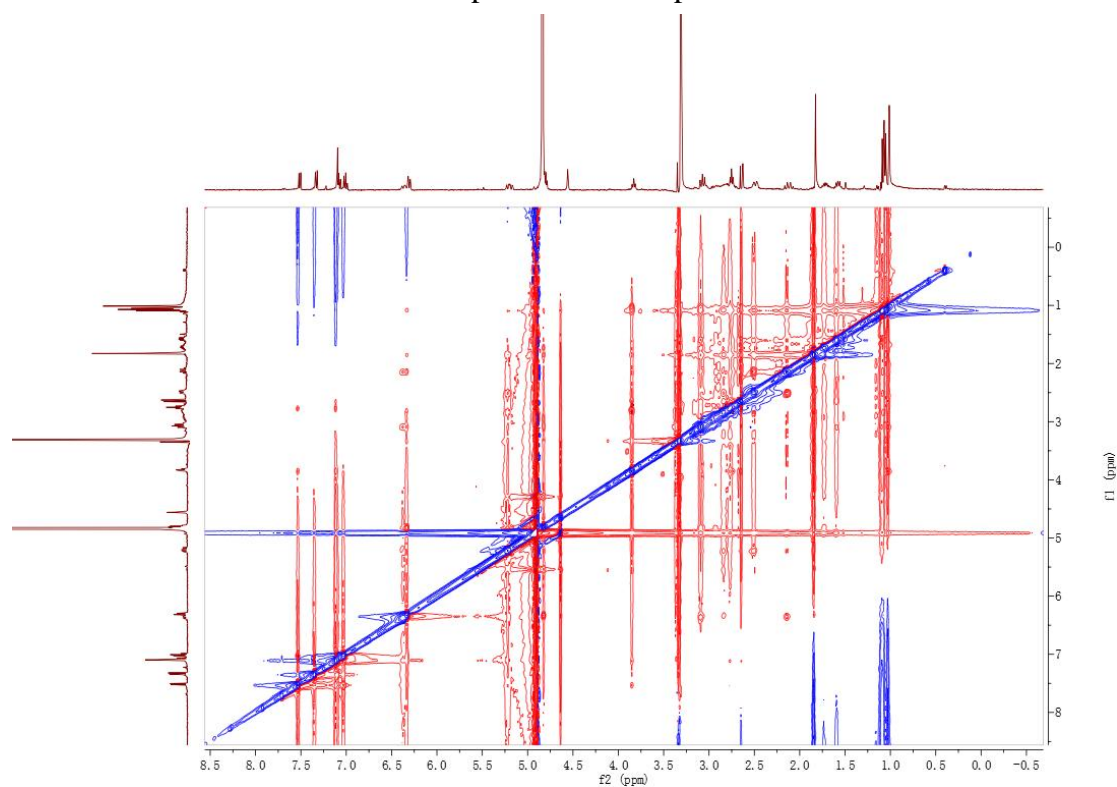

UV spectrum of compound 6

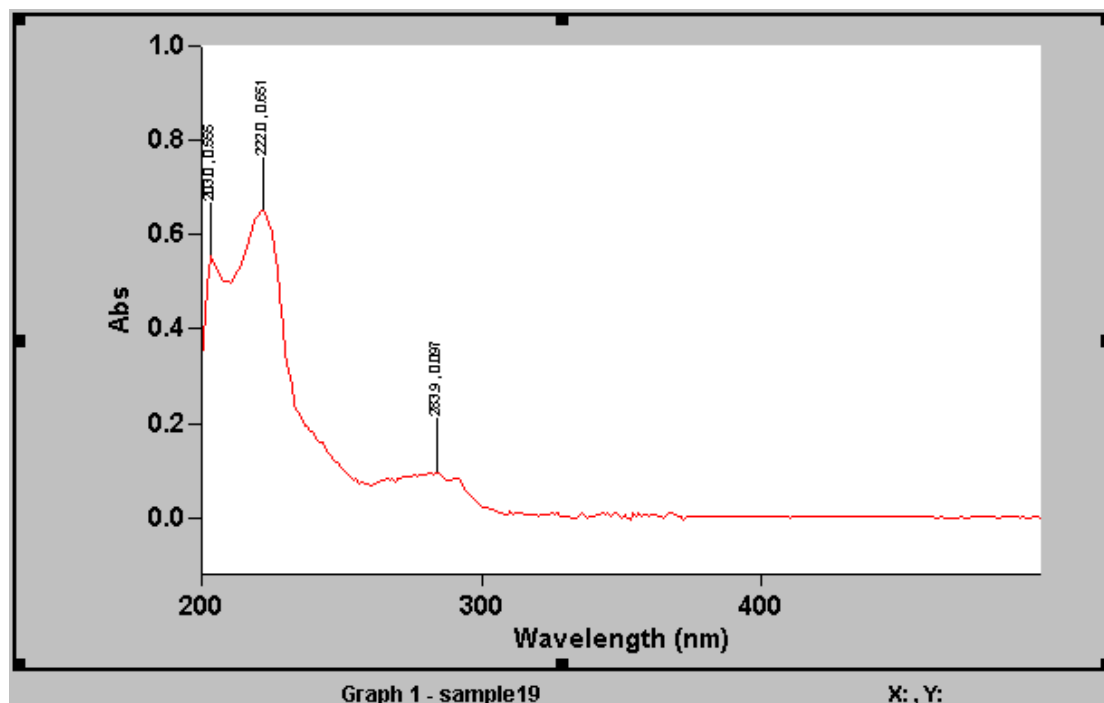

## IR spectrum of compound 6

E:\河济医学院\张勇慧\20131217\2-65-2.0

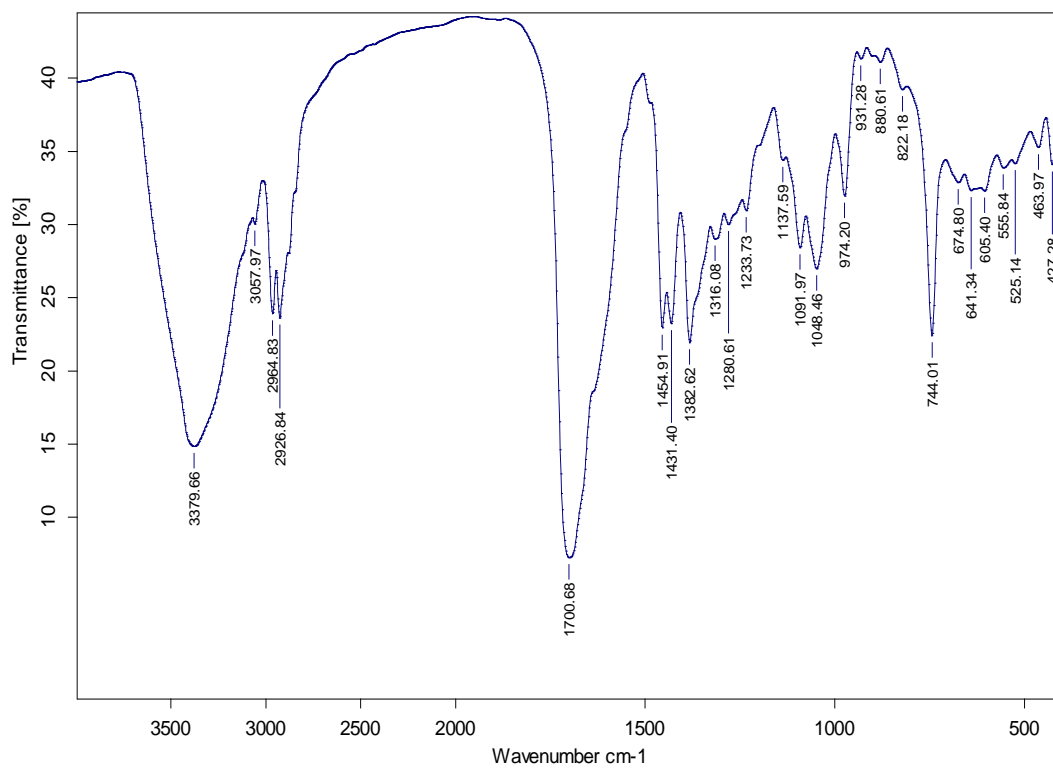

## HRESIMS spectrum of compound 6

CCM2-98-4 #16 RT: 0.24 AV: 1 NL: 1.76E5  
T: FTMS + p ESI Full ms [50.00-1500.00]

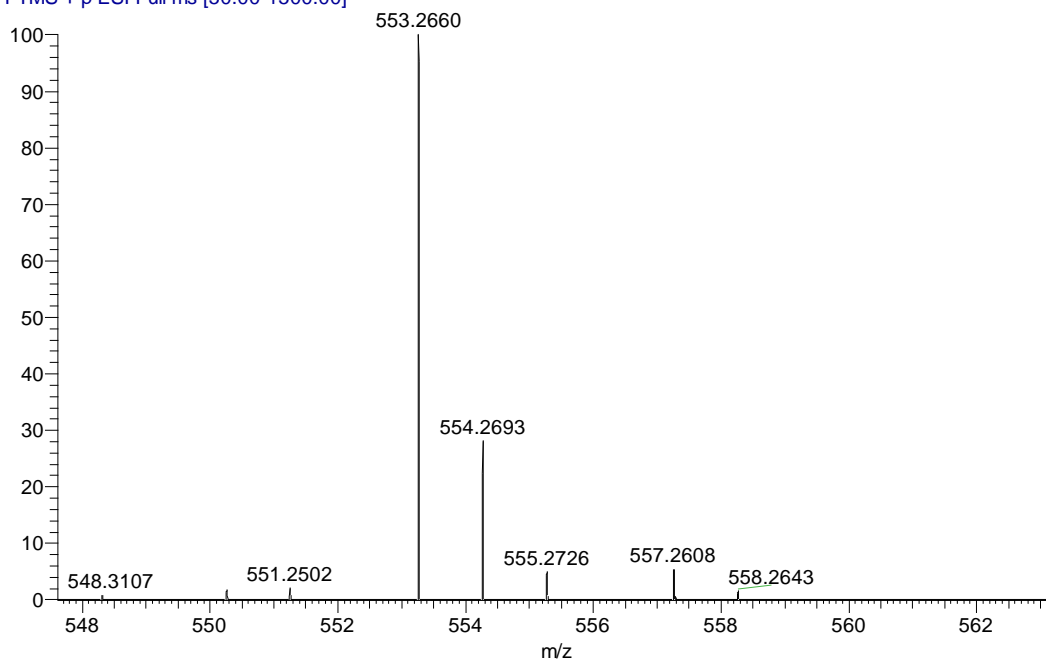

### <sup>1</sup>H NMR spectrum of compound 6

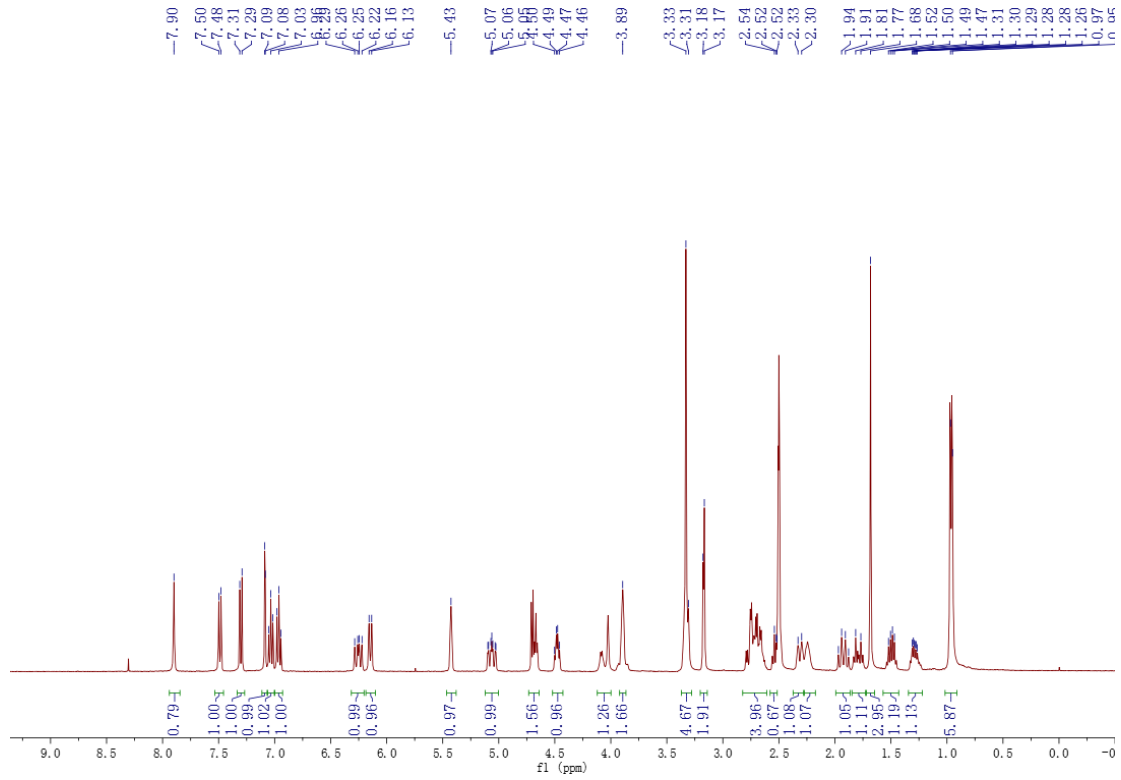

### <sup>13</sup>C NMR and DEPT spectra of compound 6

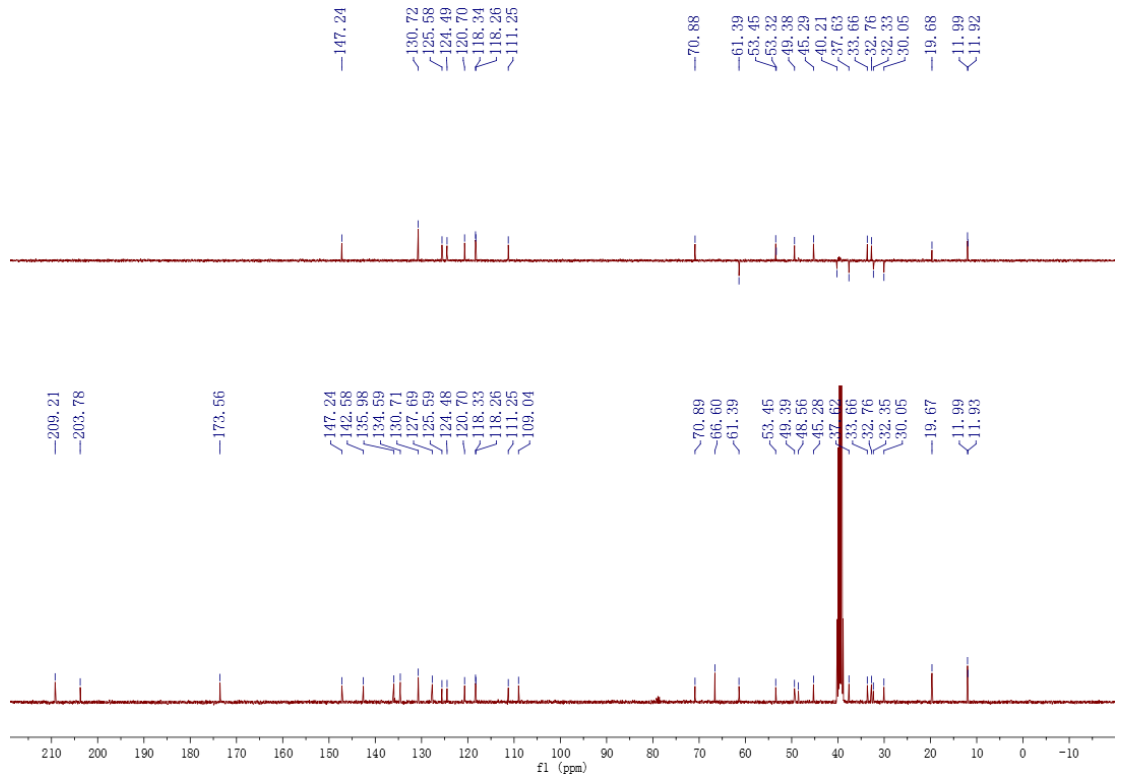

HSQC spectrum of compound **6**

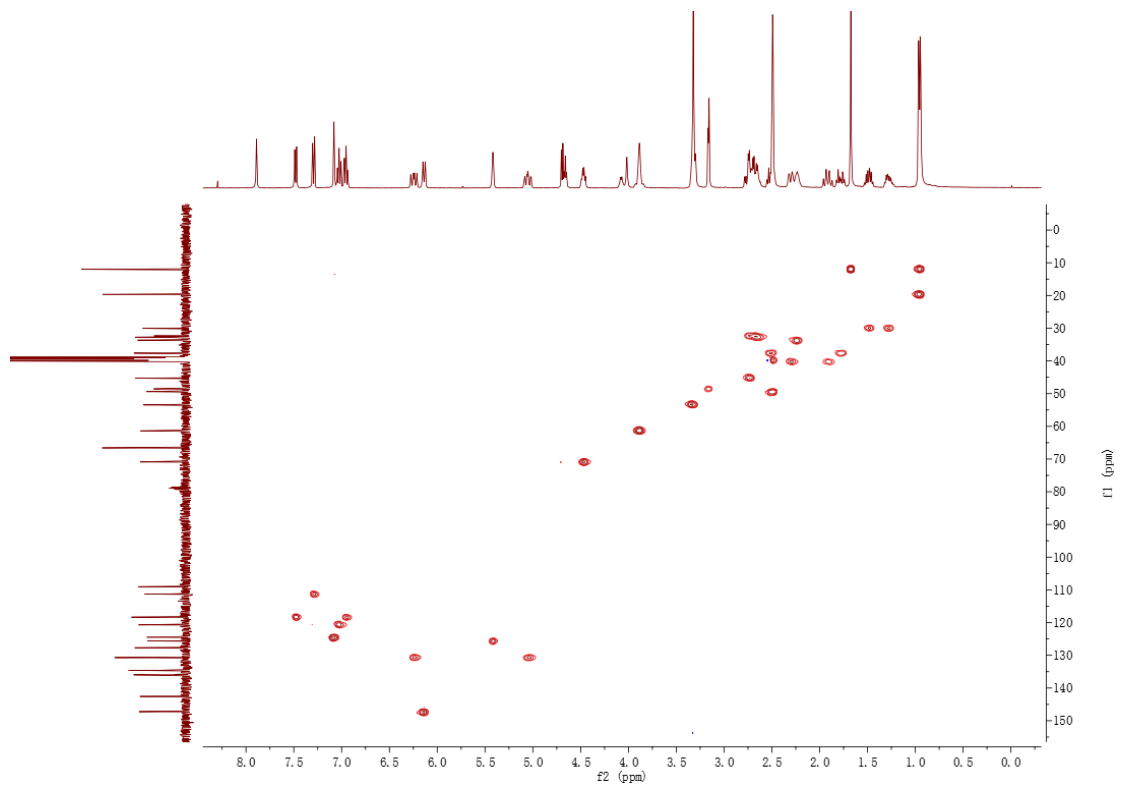

HMBC spectrum of compound **6**

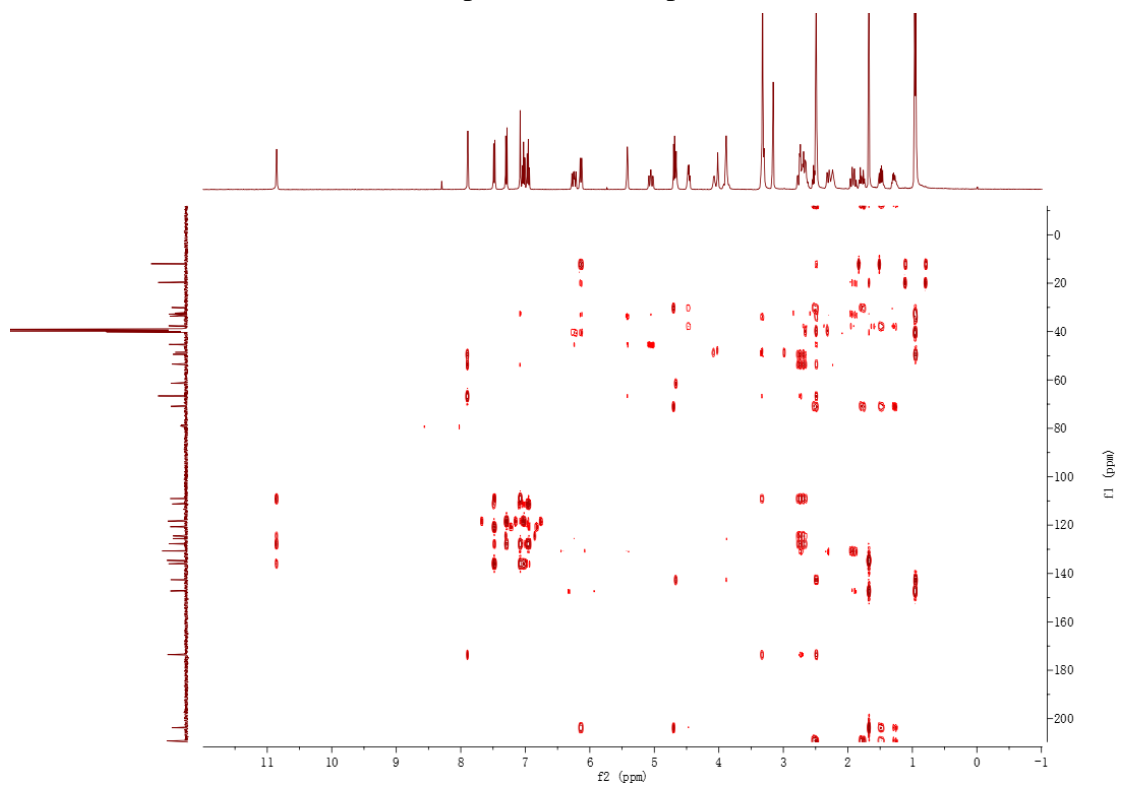

$^1\text{H}$ - $^1\text{H}$  COSY spectrum of compound **6**

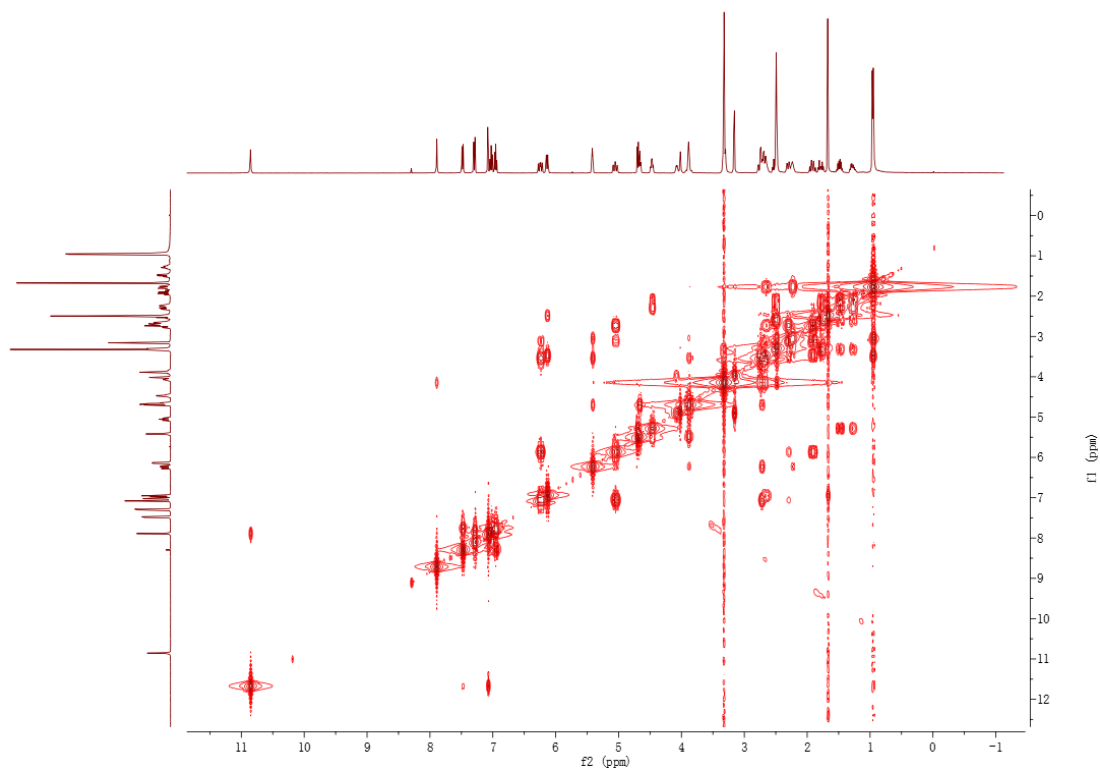

NOESY spectrum of compound **6**

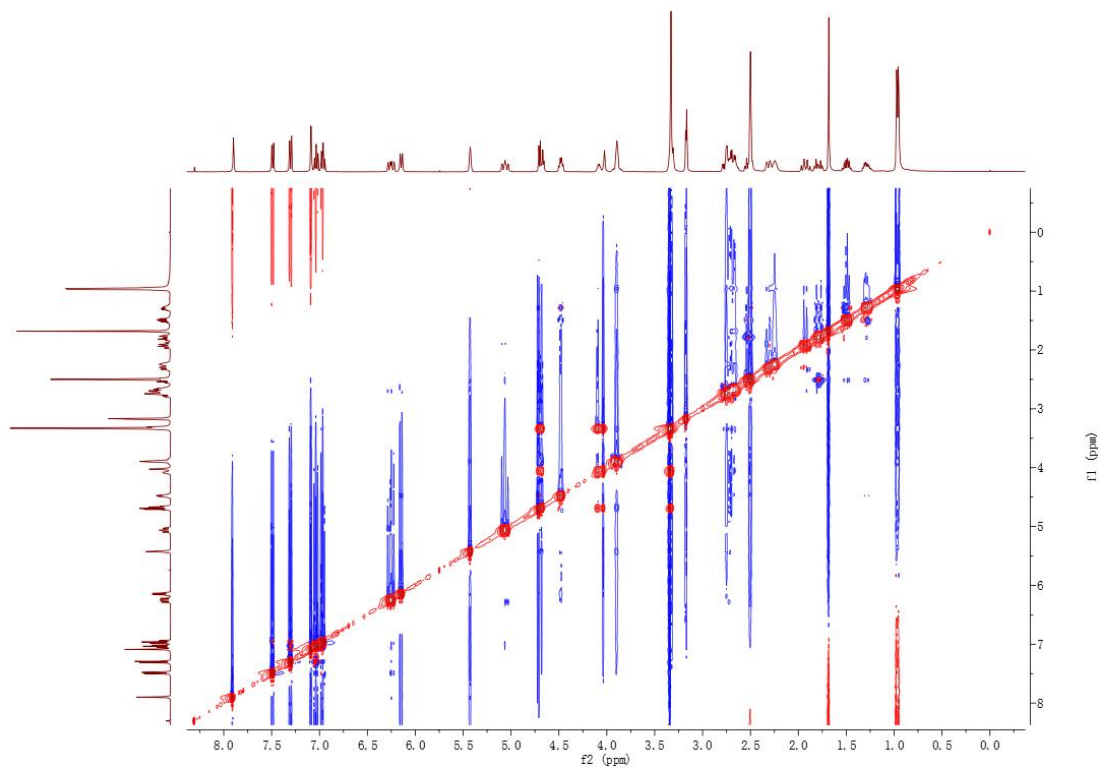

### UV spectrum of compound 7

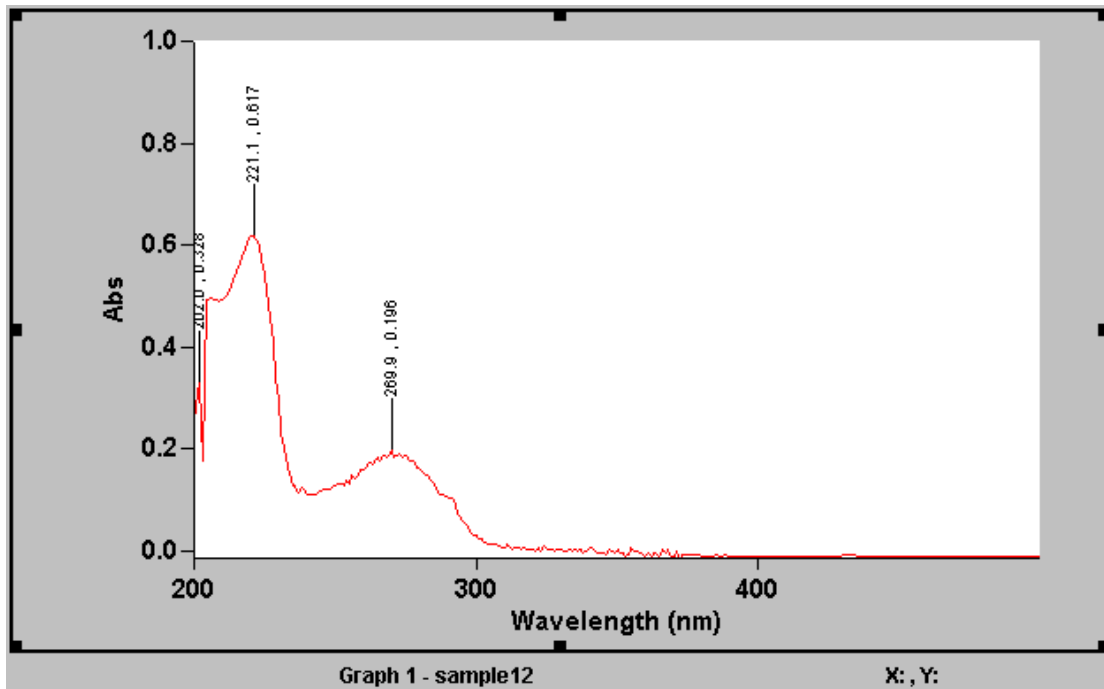

### IR spectrum of compound 7

E:\同济医学院\张勇慧\20140617\001.9

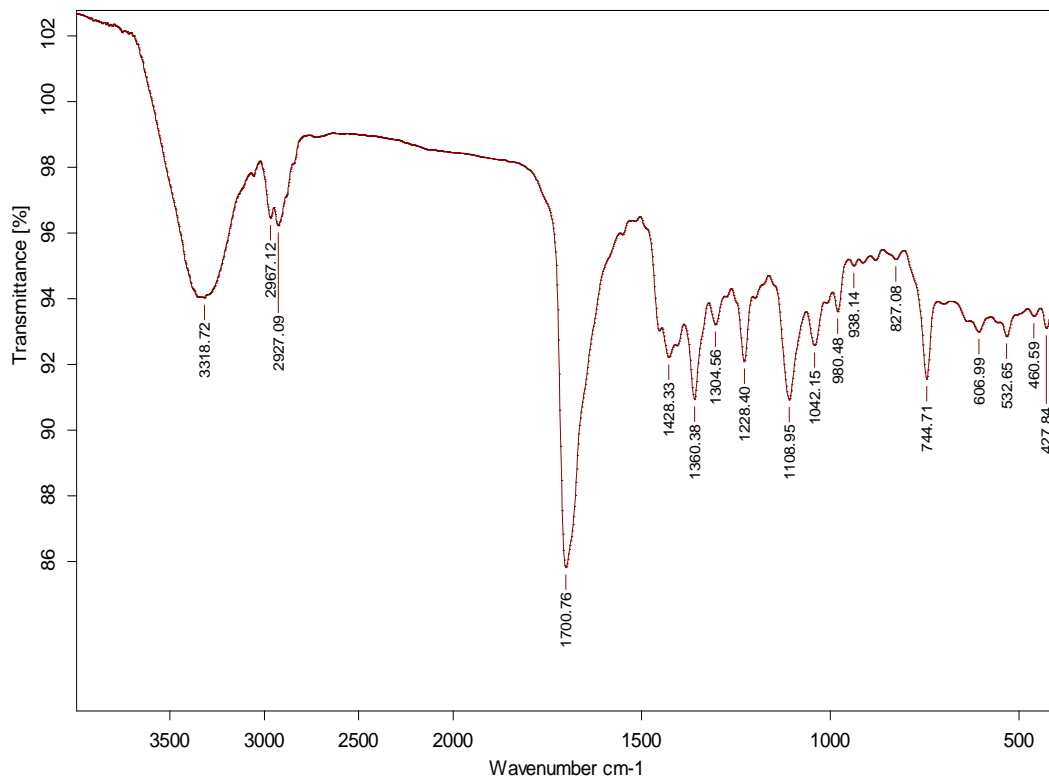

# HRESIMS spectrum of compound 7

CCM2-98-6 #21 RT: 0.31 AV: 1 NL: 1.39E5  
T: FTMS + p ESI Full ms [50.00-1500.00]

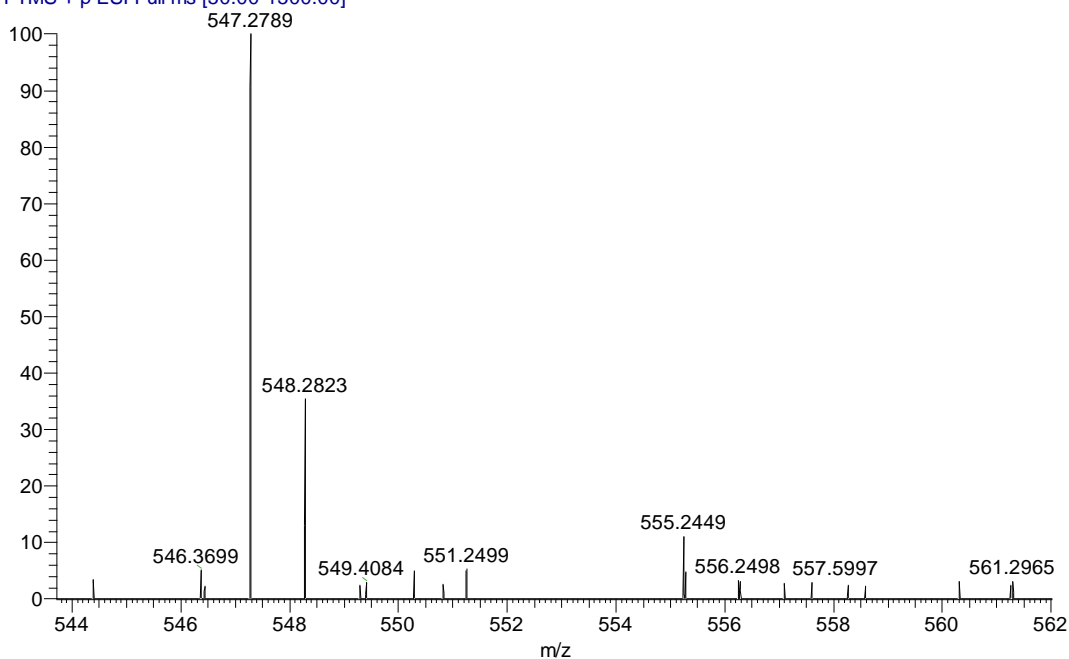

# <sup>1</sup>H NMR spectrum of compound 7

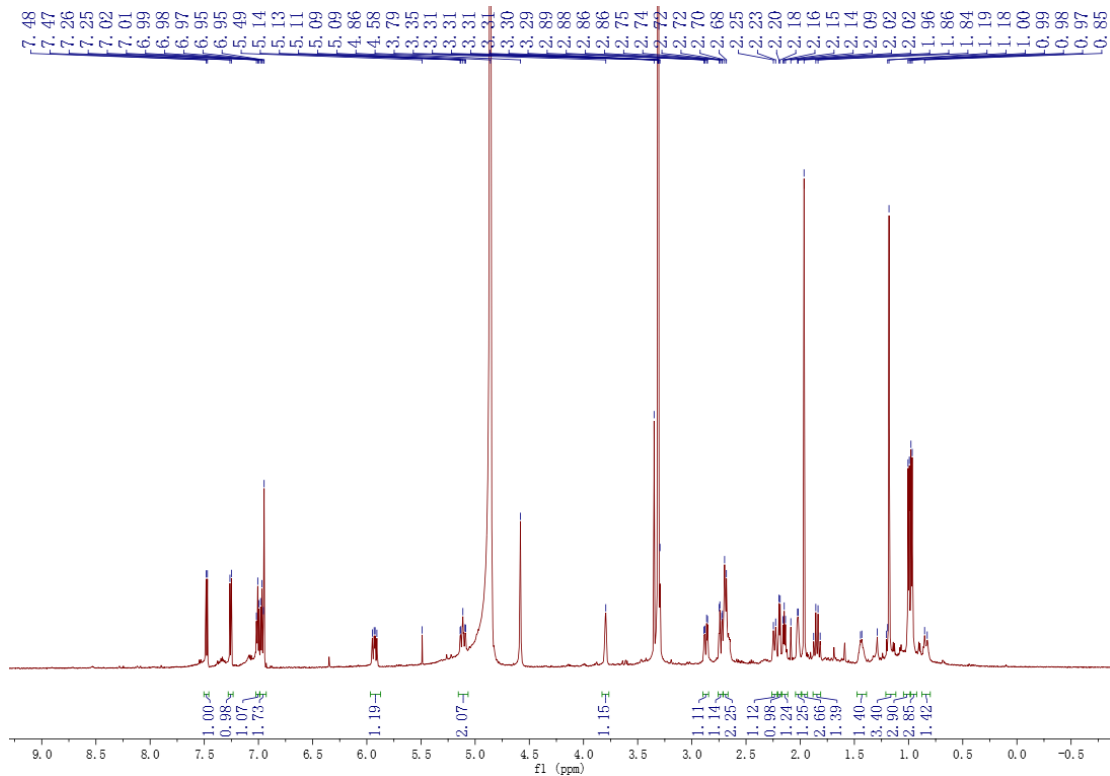



### <sup>13</sup>C NMR and DEPT spectra of compound 7

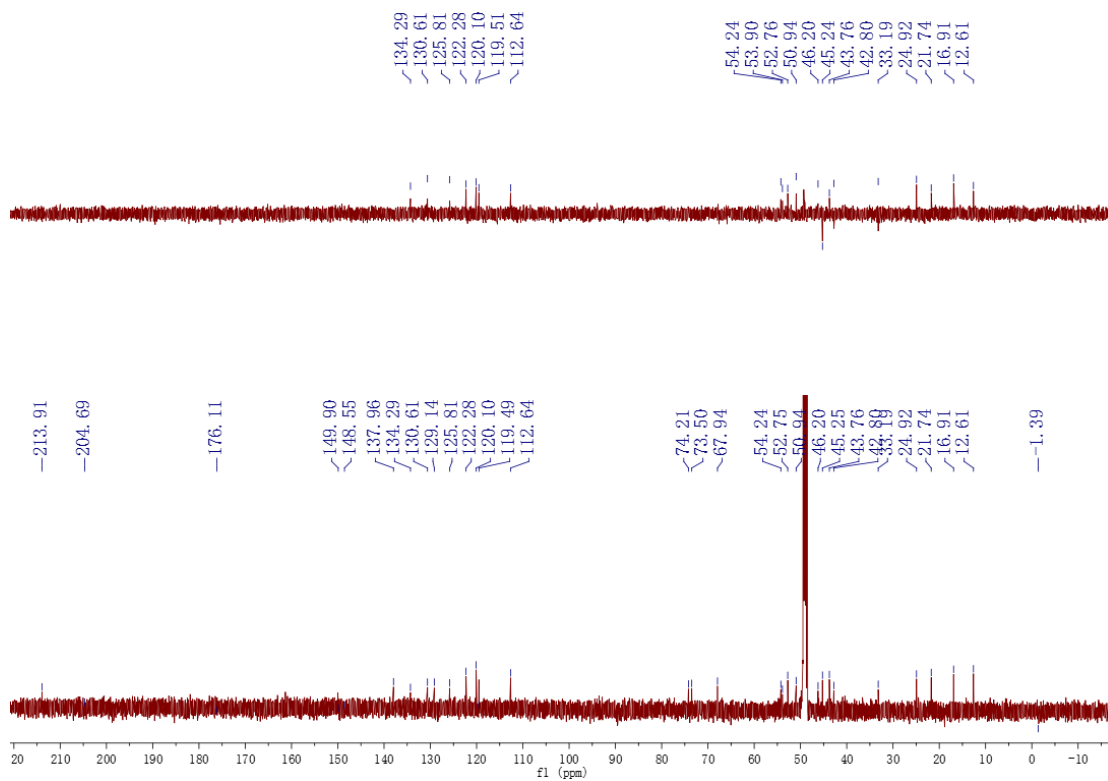

### HSQC spectrum of compound 7

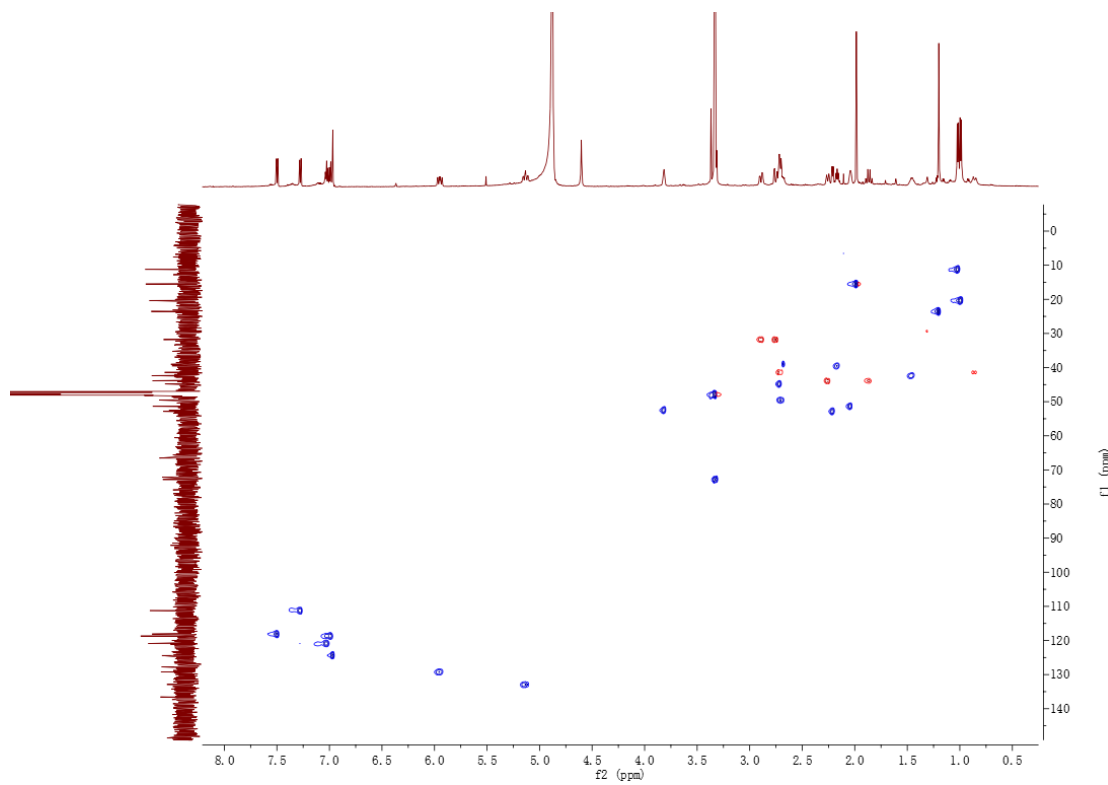

HMBC spectrum of compound 7

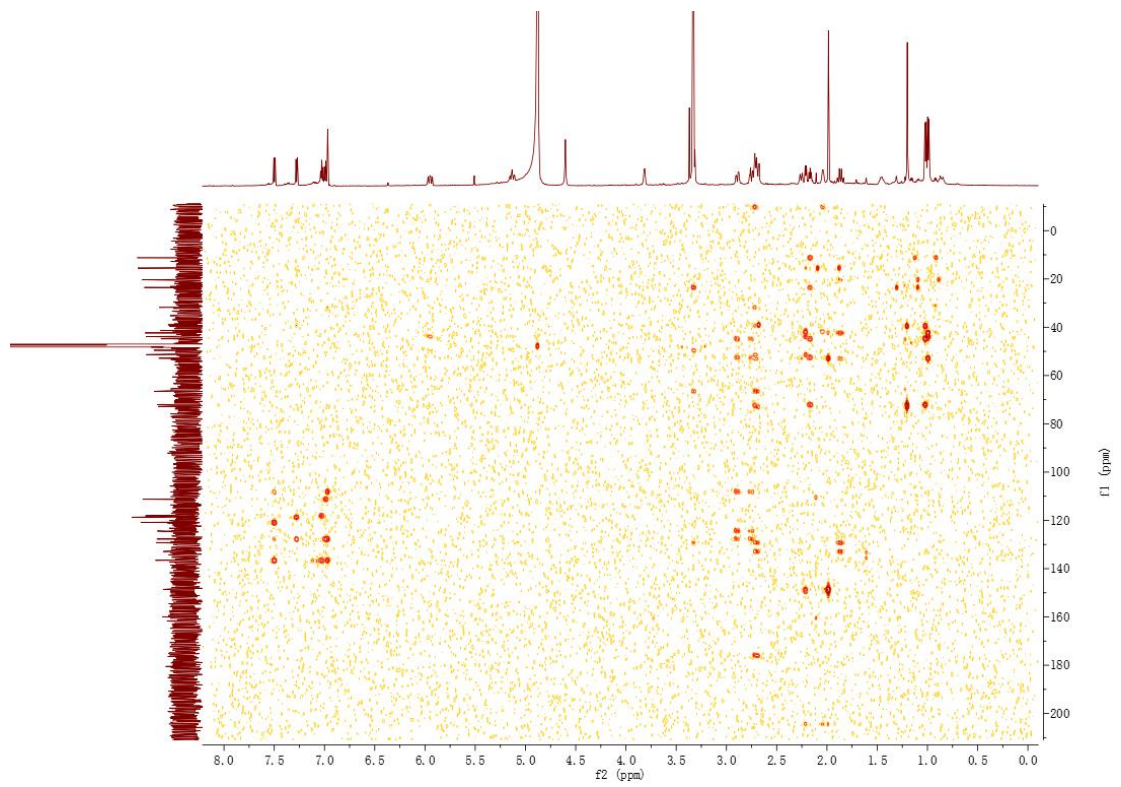

$^1\text{H}$ - $^1\text{H}$  COSY spectrum of compound 7

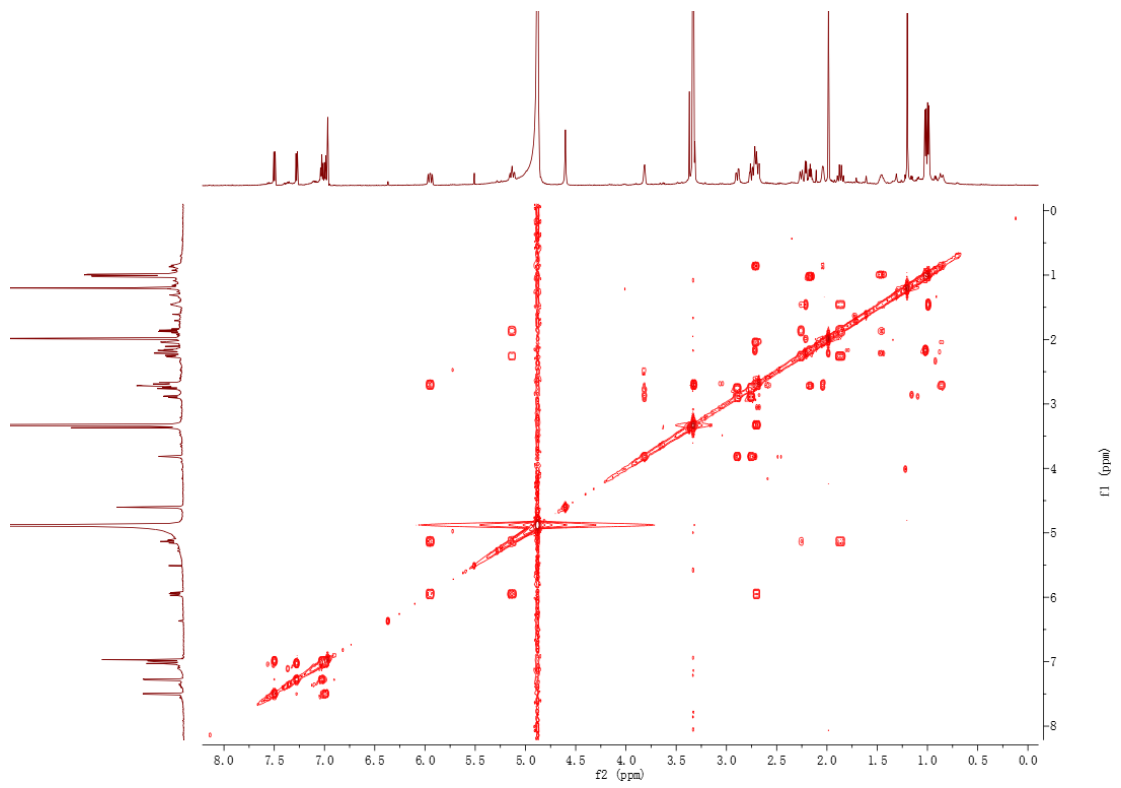

Y spectrum of compound 7

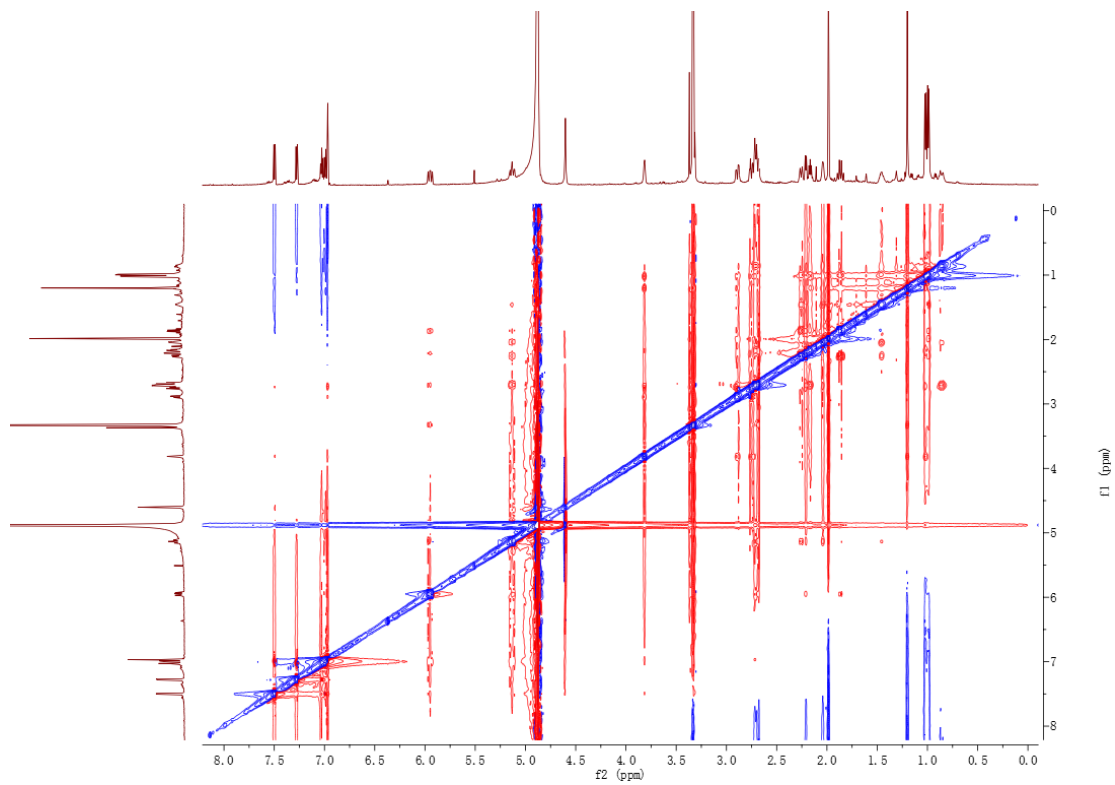

UV spectrum of compound 8

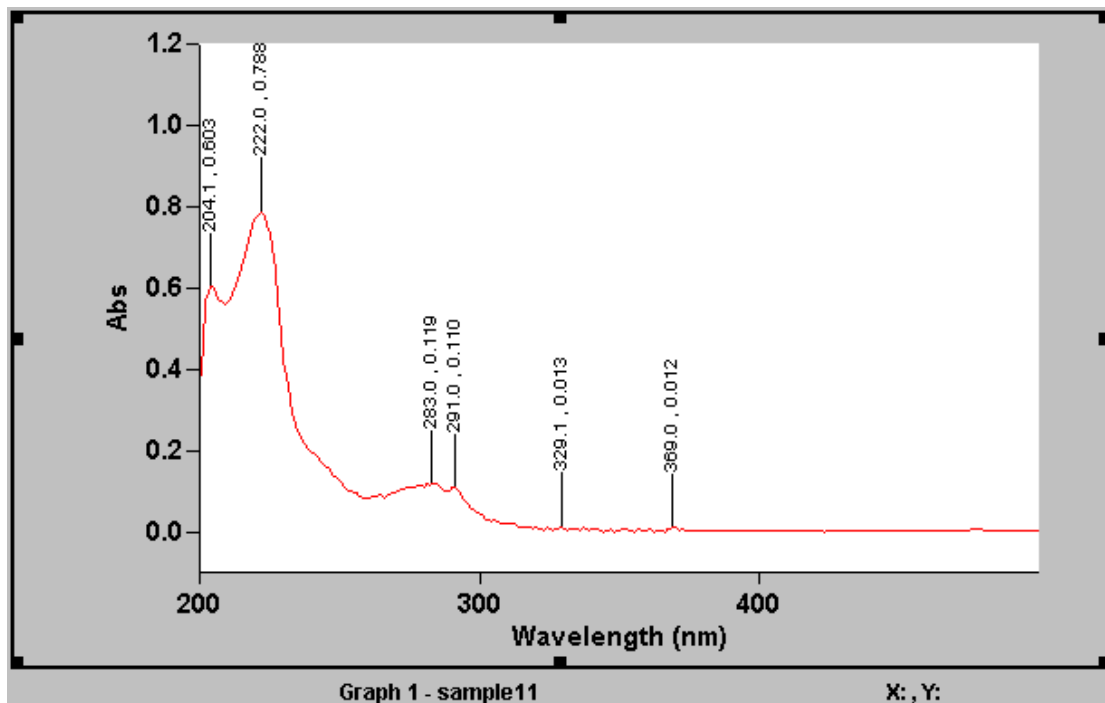

## IR spectrum of compound **8**

E:\同济医学院\张勇慧\20131217\2-64-1.0

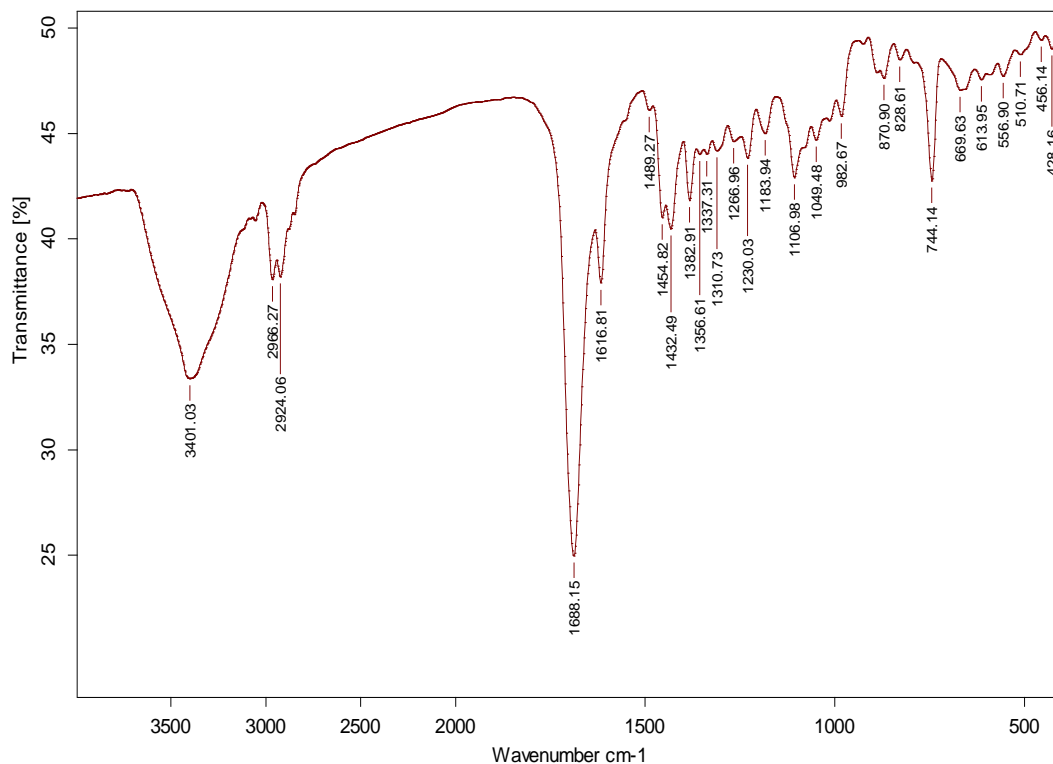

## HRESIMS spectrum of compound **8**

csm2-64-1 #27 RT: 0.38 AV: 1 NL: 1.15E7  
T: FTMS + p ESI Full ms [50.00-1500.00]

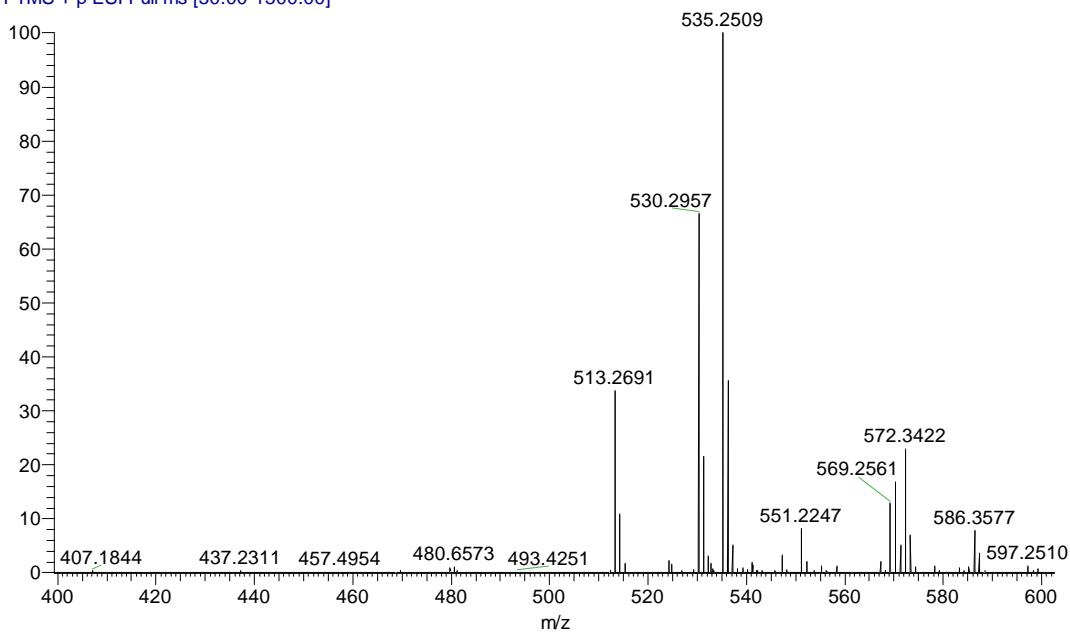

### <sup>1</sup>H NMR spectrum of compound **8**

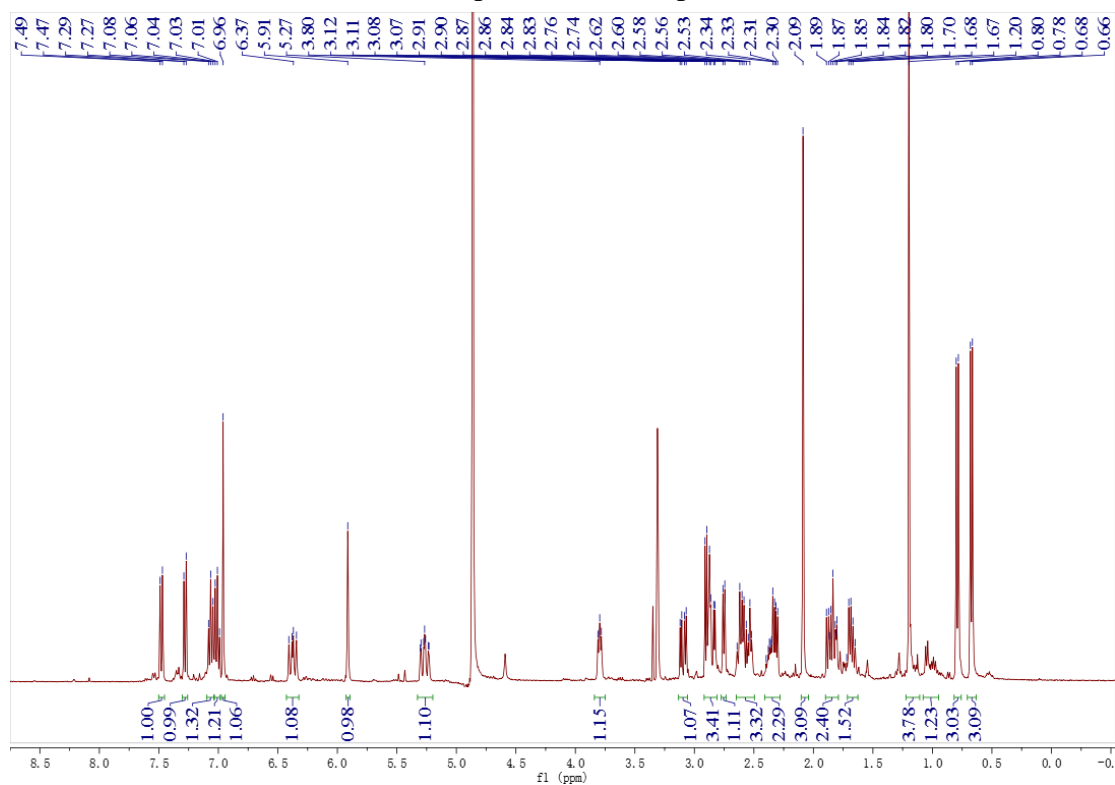

### <sup>13</sup>C NMR and DEPT spectra of compound **8**

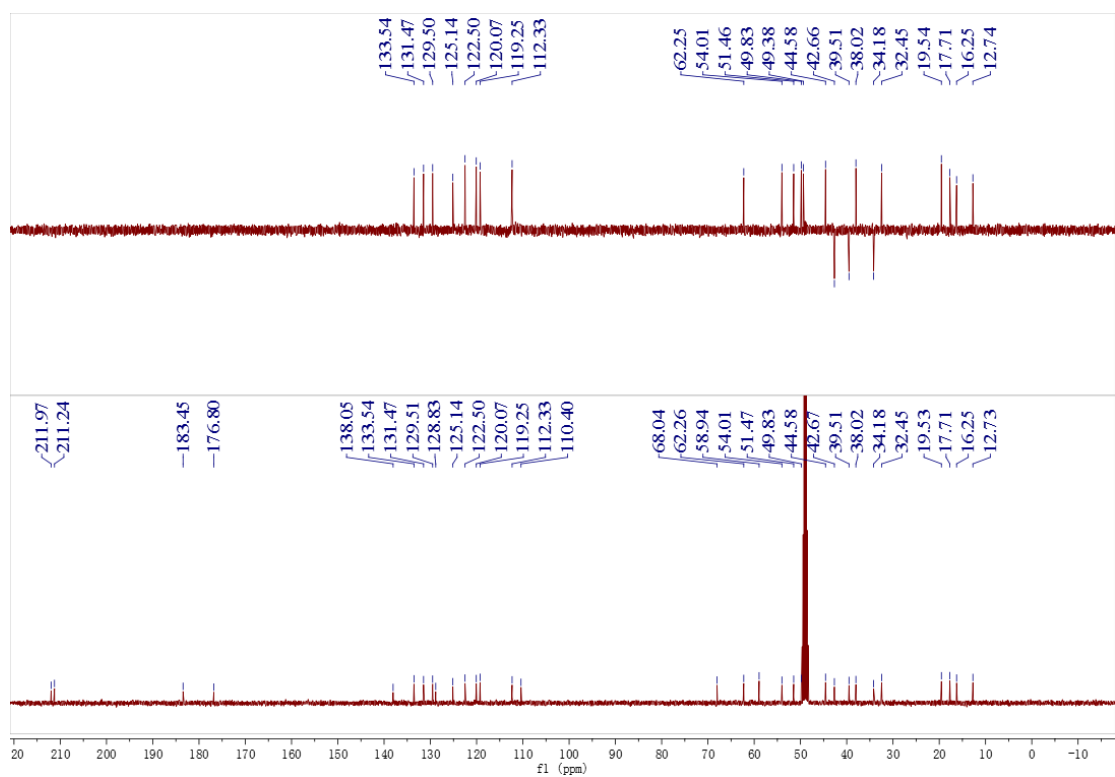

HSQC spectrum of compound **8**

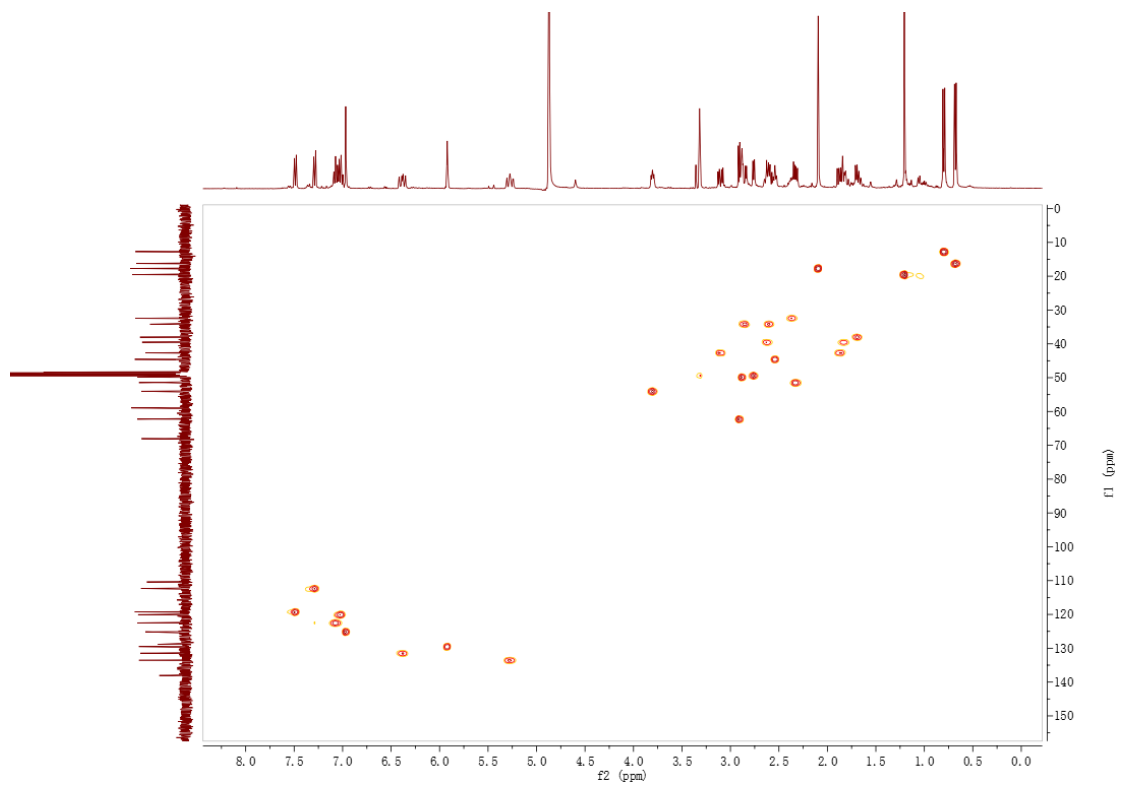

HMBC spectrum of compound **8**

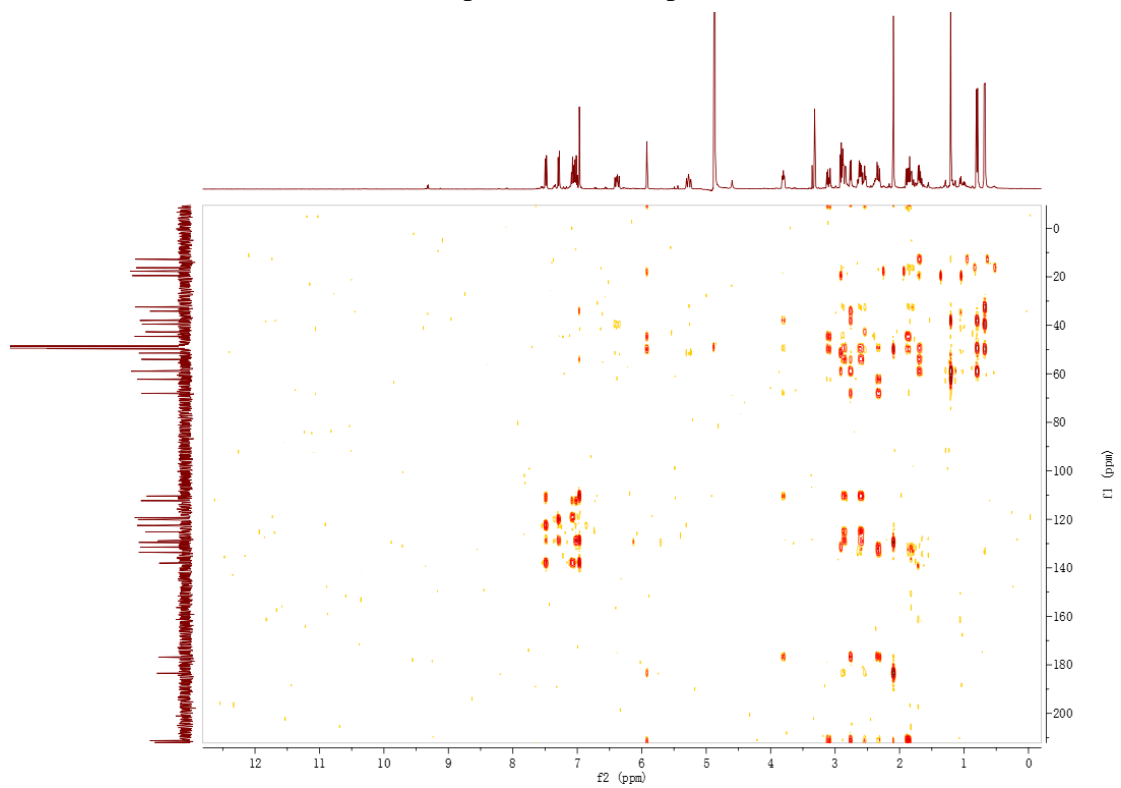

$^1\text{H}$ - $^1\text{H}$  COSY spectrum of compound **8**

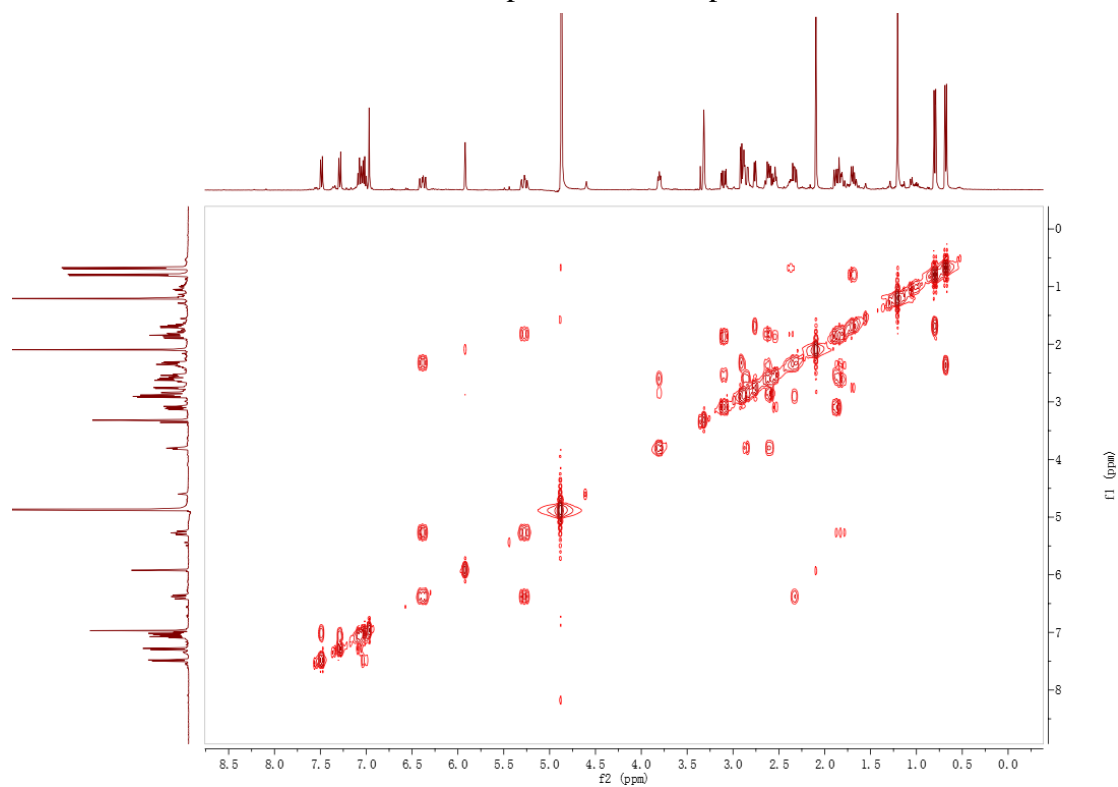

NOESY spectrum of compound **8**

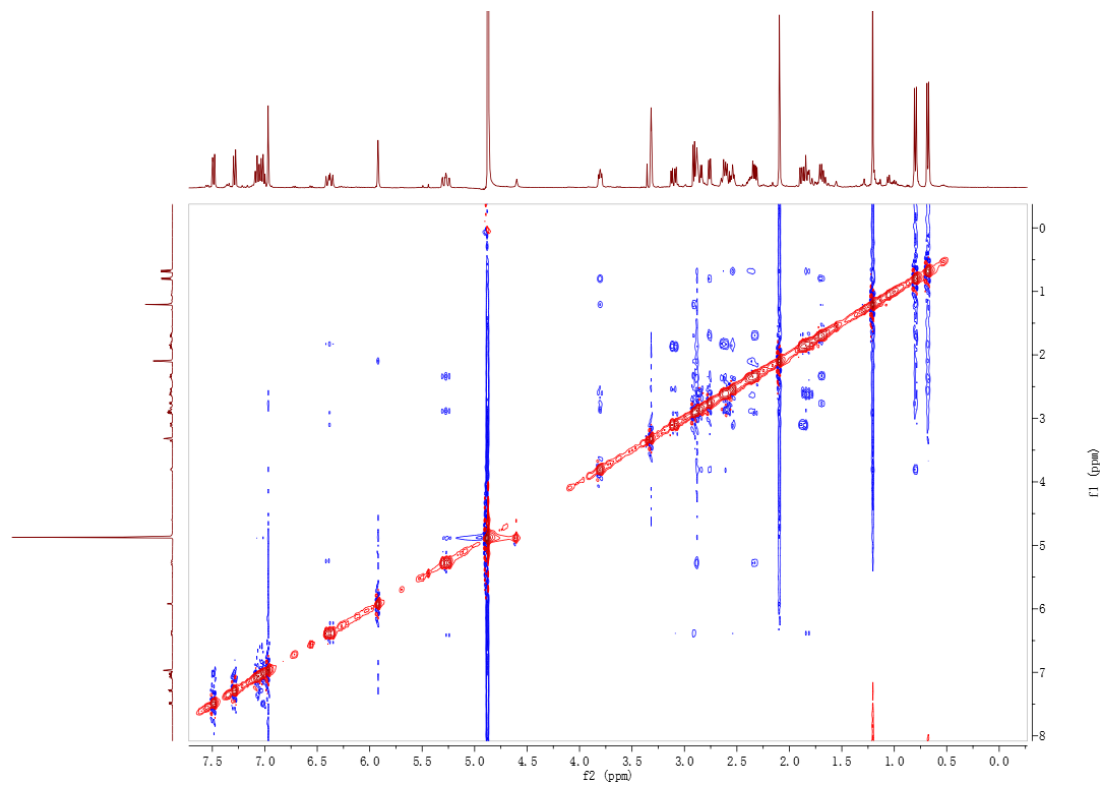

# UV spectrum of compound 9

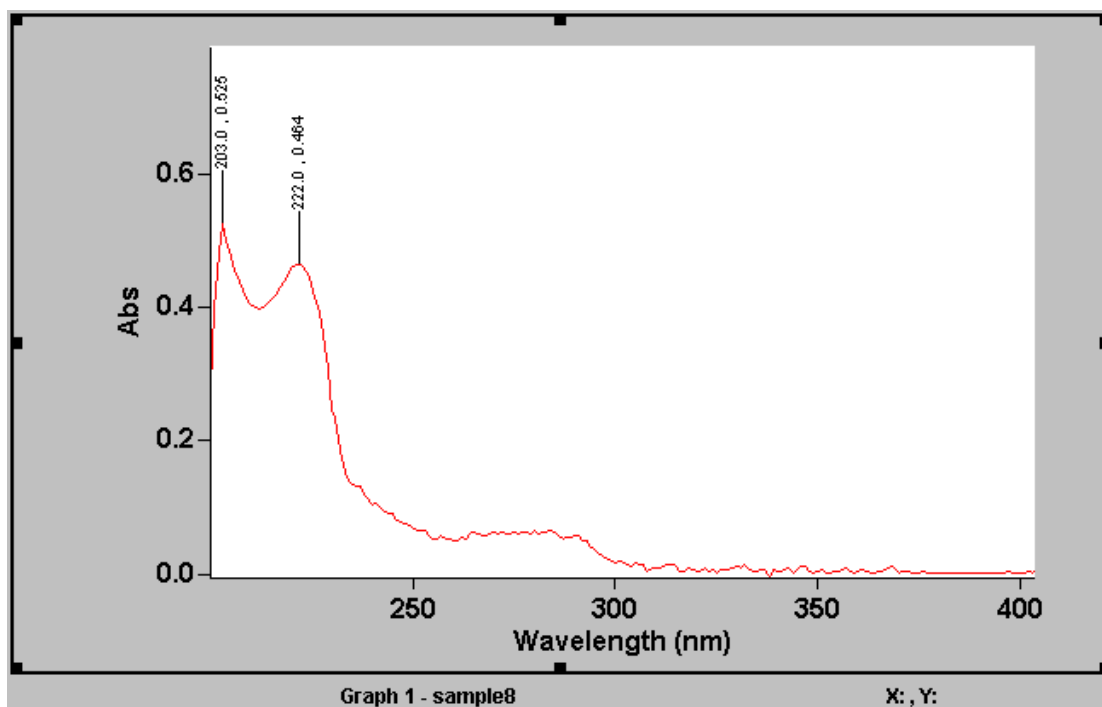

# IR spectrum of compound 9

E:\同济医学院\张勇慧\20140325\CG2-73-1.0

仪器型号: Bruker Vertex 70

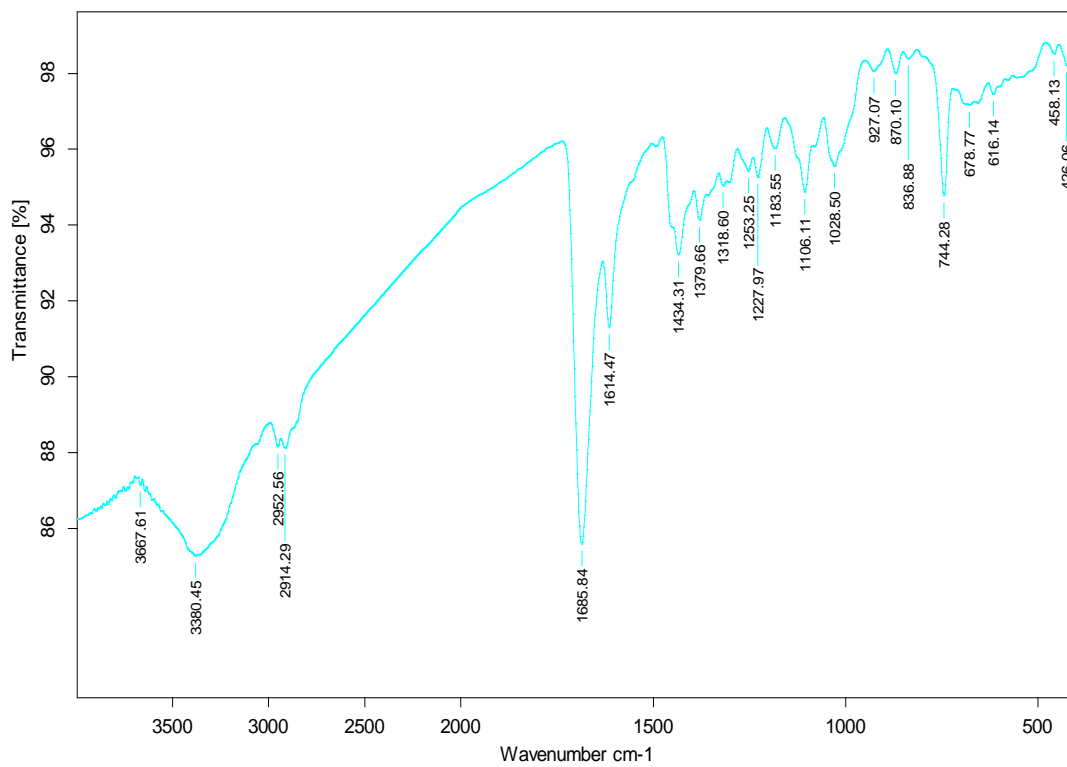



# HRESIMS spectrum of compound 9

CG2-73-1 #26 RT: 0.37 AV: 1 NL: 1.19E7  
T: FTMS + p ESI Full ms [50.00-1500.00]

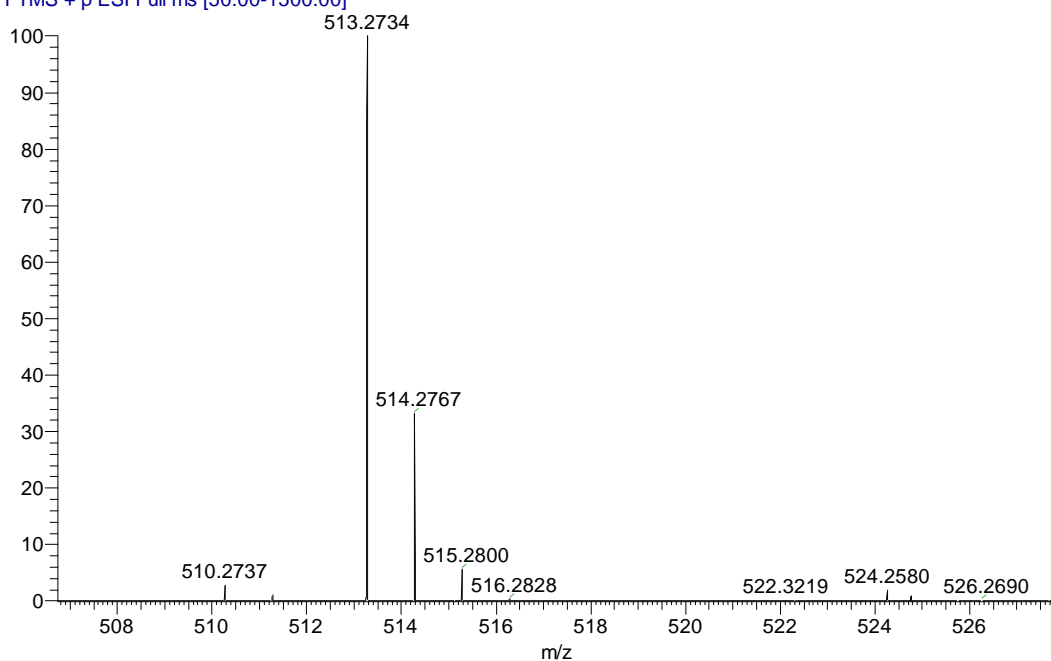

# <sup>1</sup>H NMR spectrum of compound 9

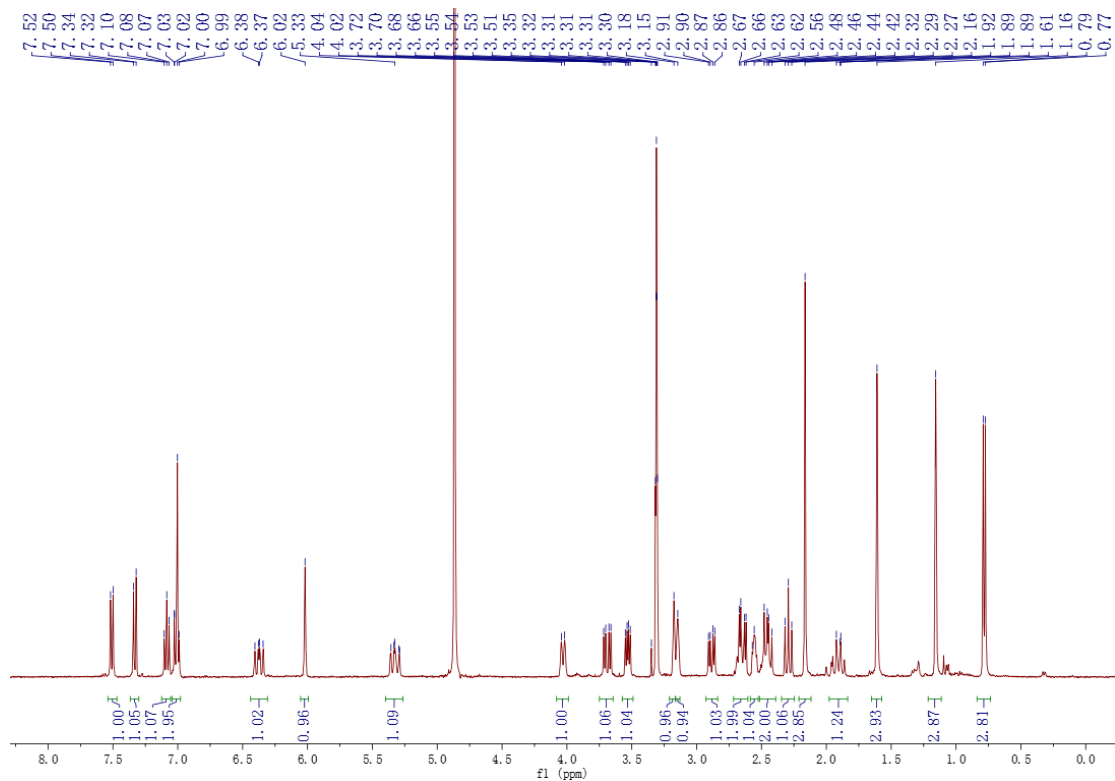

### <sup>13</sup>C NMR and DEPT spectra of compound 9

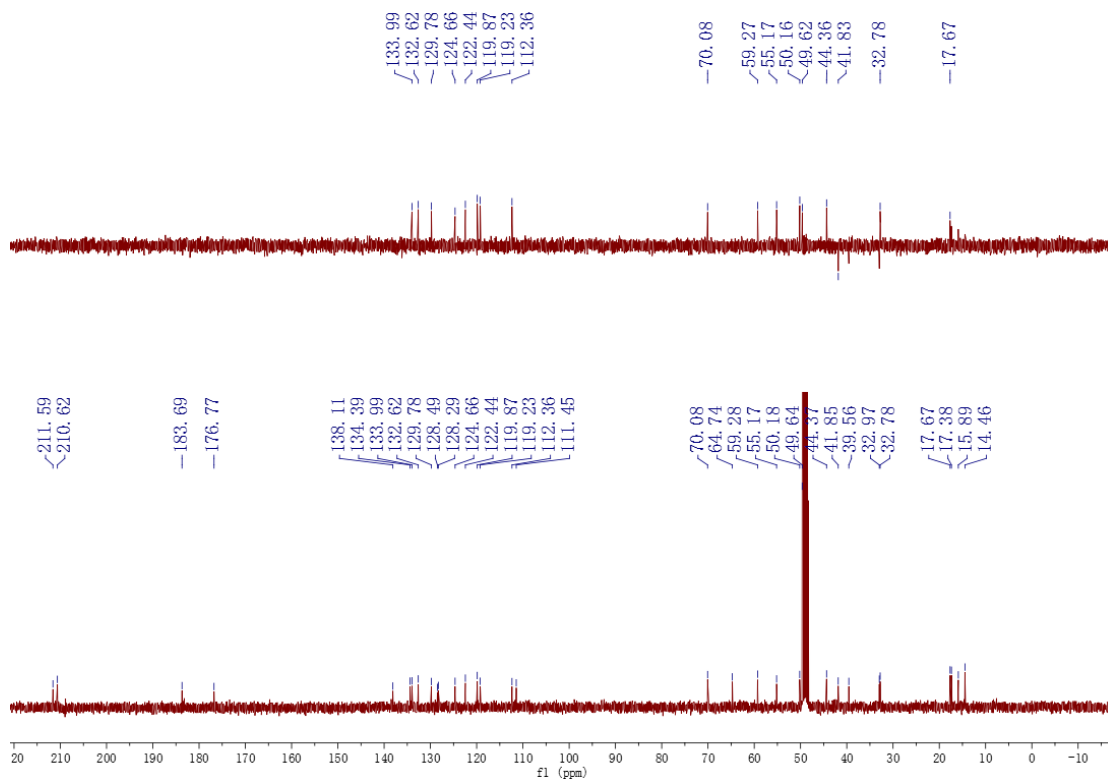

### HSQC spectrum of compound 9

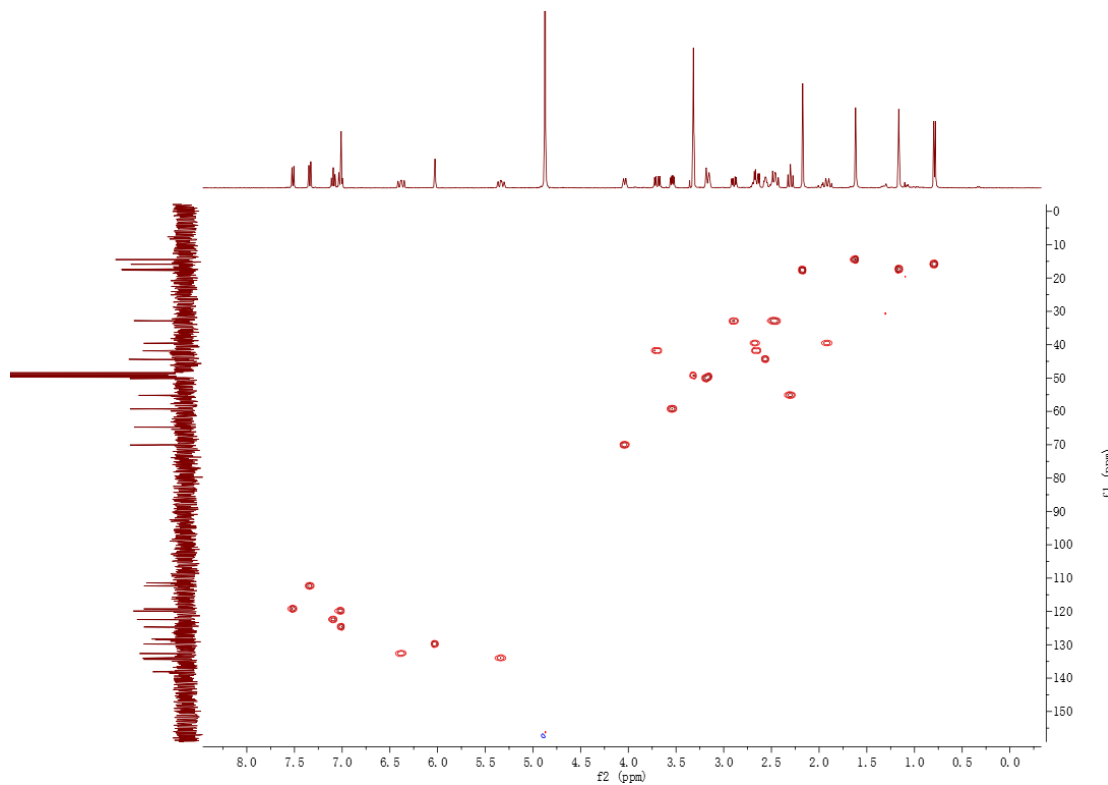

HMBC spectrum of compound **9**

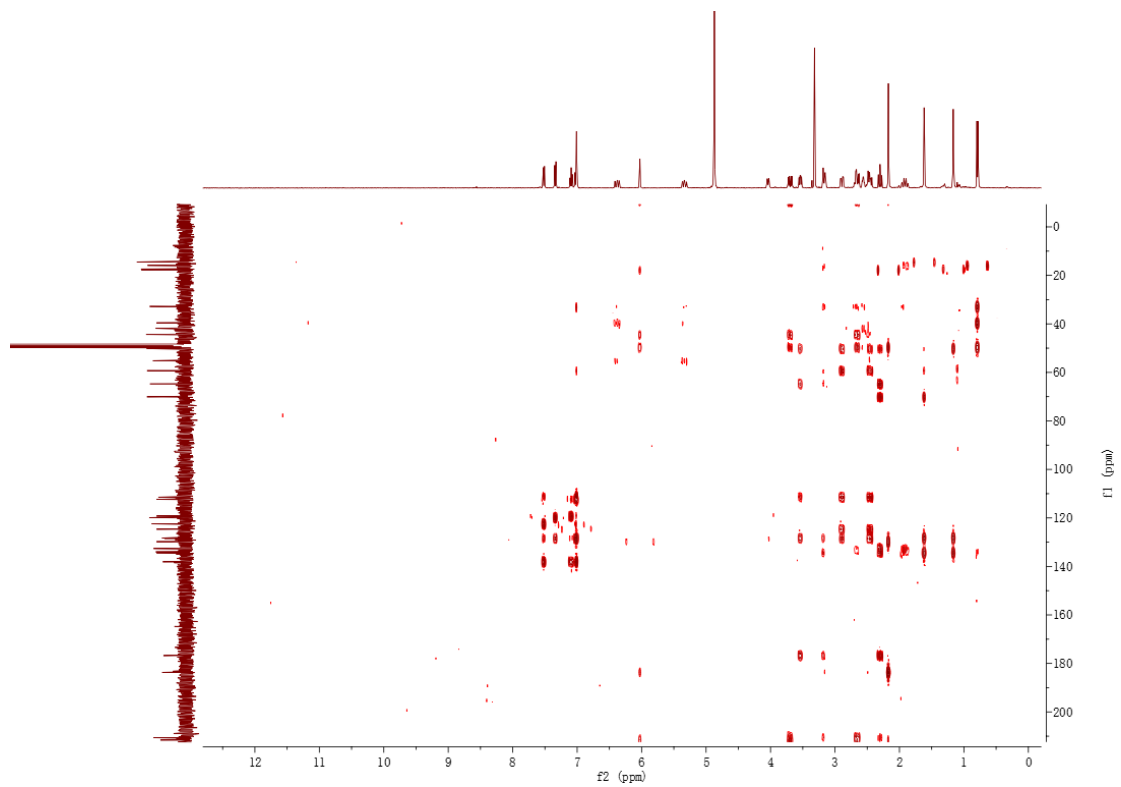

$^1\text{H}$ - $^1\text{H}$  COSY spectrum of compound **9**

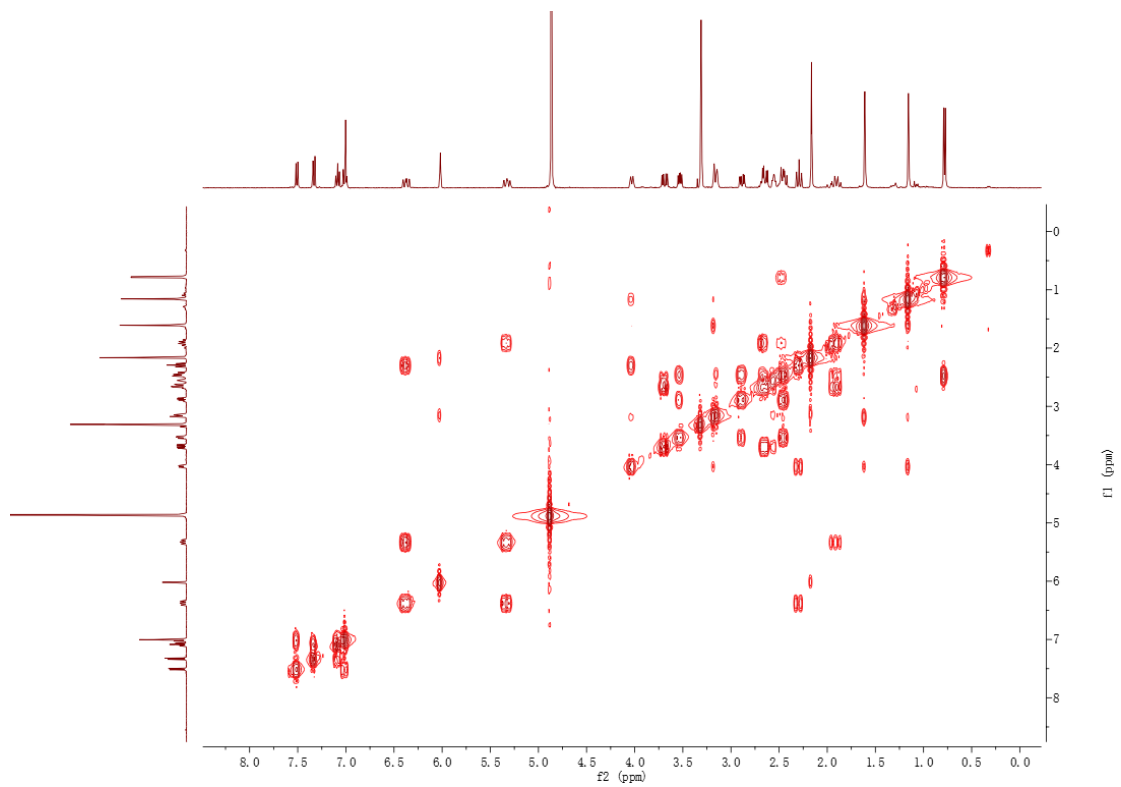

# NOESY spectrum of compound 9

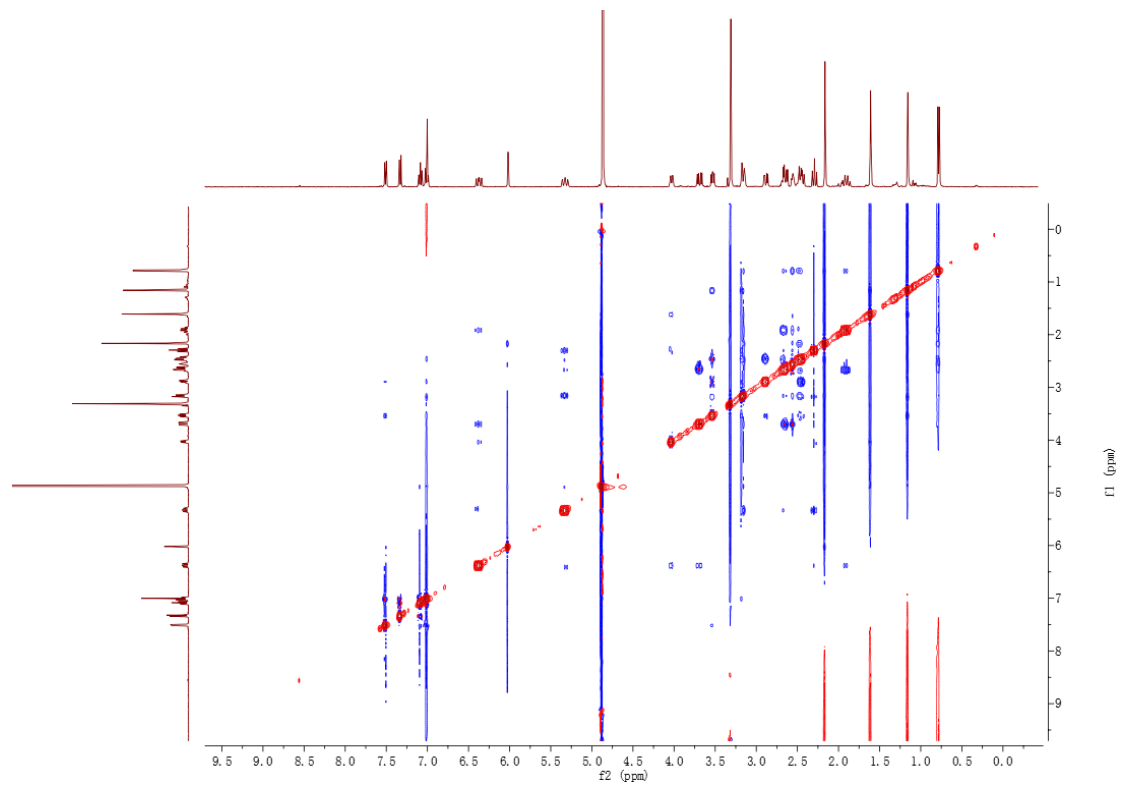

Supplement: srep18711-s1.pdf [file srep18711-s1.pdf]
